# Supplementary material for: Conserved non-AUG uORFs revealed by a novel regression analysis of ribosome profiling data
Source: Genome Res. 2018 Feb;28(2):214–22. doi: 10.1101/gr.221507.117 (PMC5793785; doi:10.1101/gr.221507.117)
Supplement: Supplemental Material [file supp_gr.221507.117_Supplemental_Table_S1.xlsx]

## Sheet: Short-TLS-GO-bioprocess-enrich
Category	BH-corrected p-value	Genes	Category Number
cytoplasmic translation	2.50264e-17	YAL035W,YAL036C,YBR079C,YDL075W,YDL081C,YDL184C,YEL054C,YER117W,YGL135W,YGR034W,YGR214W,YHL015W,YJL189W,YJR123W,YKL180W,YLR029C,YLR048W,YLR075W,YLR167W,YLR262C-A,YLR340W,YLR344W,YML063W,YNL178W,YOL040C,YOL120C,YOR063W,YOR293W,YPL090C,YPL143W	GO:0002181
translational elongation	2.00909e-14	YAL003W,YAL036C,YDL075W,YDL081C,YDL184C,YEL054C,YER117W,YGL135W,YGR034W,YGR214W,YHL015W,YIL051C,YJL189W,YJR123W,YKL180W,YLR029C,YLR048W,YLR075W,YLR150W,YLR167W,YLR249W,YLR262C-A,YLR340W,YLR344W,YML063W,YMR116C,YNL081C,YNL177C,YNL178W,YOL040C,YOL120C,YOR063W,YOR150W,YOR293W,YPL090C,YPL143W	GO:0006414
translation	4.93172e-11	YAL003W,YAL035W,YAL036C,YBR079C,YDL075W,YDL081C,YDL184C,YDR432W,YEL054C,YER117W,YGL135W,YGR034W,YGR214W,YHL015W,YIL051C,YJL138C,YJL189W,YJR123W,YKL180W,YLR029C,YLR048W,YLR075W,YLR150W,YLR167W,YLR203C,YLR249W,YLR262C-A,YLR340W,YLR344W,YML063W,YMR116C,YMR309C,YNL081C,YNL177C,YNL178W,YOL040C,YOL120C,YOR063W,YOR150W,YOR293W,YPL090C,YPL143W	GO:0006412
peptide biosynthetic process	7.03126e-11	YAL003W,YAL035W,YAL036C,YBR079C,YDL075W,YDL081C,YDL184C,YDR432W,YEL054C,YER117W,YGL135W,YGR034W,YGR214W,YHL015W,YIL051C,YJL138C,YJL189W,YJR123W,YKL180W,YLR029C,YLR048W,YLR075W,YLR150W,YLR167W,YLR203C,YLR249W,YLR262C-A,YLR340W,YLR344W,YML063W,YMR116C,YMR309C,YNL081C,YNL177C,YNL178W,YOL040C,YOL120C,YOR063W,YOR150W,YOR293W,YPL090C,YPL143W	GO:0043043
peptide metabolic process	2.25946e-10	YAL003W,YAL035W,YAL036C,YBR079C,YDL075W,YDL081C,YDL184C,YDR432W,YEL054C,YER117W,YGL135W,YGR034W,YGR209C,YGR214W,YHL015W,YIL051C,YJL138C,YJL189W,YJR123W,YKL180W,YLR029C,YLR048W,YLR075W,YLR150W,YLR167W,YLR203C,YLR249W,YLR262C-A,YLR340W,YLR344W,YML063W,YMR116C,YMR309C,YNL081C,YNL177C,YNL178W,YOL040C,YOL120C,YOR063W,YOR150W,YOR293W,YPL090C,YPL143W	GO:0006518
amide biosynthetic process	4.32587e-10	YAL003W,YAL035W,YAL036C,YBR079C,YDL075W,YDL081C,YDL184C,YDR432W,YEL054C,YER117W,YGL135W,YGR034W,YGR214W,YHL015W,YIL051C,YJL138C,YJL189W,YJR123W,YKL180W,YLR029C,YLR048W,YLR075W,YLR150W,YLR167W,YLR203C,YLR249W,YLR262C-A,YLR340W,YLR344W,YML063W,YMR116C,YMR309C,YNL081C,YNL177C,YNL178W,YOL040C,YOL120C,YOR063W,YOR150W,YOR293W,YPL090C,YPL143W	GO:0043604
cellular amide metabolic process	3.05137e-09	YAL003W,YAL035W,YAL036C,YBR079C,YDL075W,YDL081C,YDL184C,YDR432W,YEL054C,YER117W,YGL135W,YGR034W,YGR209C,YGR214W,YHL015W,YIL051C,YJL138C,YJL189W,YJR123W,YKL180W,YLR029C,YLR048W,YLR075W,YLR150W,YLR167W,YLR203C,YLR249W,YLR262C-A,YLR340W,YLR344W,YML063W,YMR116C,YMR309C,YNL081C,YNL177C,YNL178W,YOL040C,YOL120C,YOR063W,YOR150W,YOR293W,YPL090C,YPL143W	GO:0043603
organonitrogen compound metabolic process	2.88903e-05	YAL003W,YAL035W,YAL036C,YAL038W,YBR079C,YCR012W,YCR034W,YDL022W,YDL075W,YDL081C,YDL184C,YDR294C,YDR432W,YEL054C,YER091C,YER117W,YGL135W,YGR034W,YGR204W,YGR209C,YGR214W,YHL015W,YHR174W,YIL051C,YJL055W,YJL138C,YJL189W,YJR123W,YKL180W,YLR029C,YLR044C,YLR048W,YLR075W,YLR150W,YLR167W,YLR203C,YLR249W,YLR262C-A,YLR340W,YLR344W,YML063W,YMR116C,YMR309C,YNL081C,YNL160W,YNL177C,YNL178W,YOL018C,YOL040C,YOL12…	GO:1901564
organonitrogen compound biosynthetic process	0.000549918	YAL003W,YAL035W,YAL036C,YBR079C,YCR034W,YDL075W,YDL081C,YDL184C,YDR432W,YEL054C,YER091C,YER117W,YGL135W,YGR034W,YGR204W,YGR214W,YHL015W,YIL051C,YJL138C,YJL189W,YJR123W,YKL180W,YLR029C,YLR048W,YLR075W,YLR150W,YLR167W,YLR203C,YLR249W,YLR262C-A,YLR340W,YLR344W,YML063W,YMR116C,YMR309C,YNL081C,YNL177C,YNL178W,YOL040C,YOL120C,YOR063W,YOR150W,YOR293W,YOR375C,YPL090C,YPL143W	GO:1901566
ribosome biogenesis	0.00109849	YAL035W,YDR083W,YDR087C,YDR432W,YEL054C,YGR034W,YGR103W,YGR159C,YGR214W,YHL015W,YHR052W,YHR062C,YJR123W,YKL180W,YLR048W,YLR051C,YLR075W,YLR167W,YLR222C,YLR293C,YLR340W,YLR344W,YML063W,YMR131C,YNL178W,YOL040C,YOR063W,YOR293W,YPL090C,YPL143W	GO:0042254
ribonucleoprotein complex biogenesis	0.00156979	YAL035W,YBR079C,YDR083W,YDR087C,YDR432W,YEL054C,YGR034W,YGR103W,YGR159C,YGR214W,YHL015W,YHR052W,YHR062C,YJR123W,YKL180W,YLL036C,YLR048W,YLR051C,YLR075W,YLR167W,YLR222C,YLR293C,YLR323C,YLR340W,YLR344W,YML063W,YMR131C,YMR309C,YNL178W,YOL040C,YOR063W,YOR293W,YPL090C,YPL143W	GO:0022613
ribosome assembly	0.00188946	YAL035W,YEL054C,YGR159C,YGR214W,YJR123W,YLR048W,YLR075W,YLR167W,YLR340W,YOL040C,YOR063W,YOR293W	GO:0042255
rRNA export from nucleus	0.00448168	YGR214W,YJR123W,YLR048W,YNL178W,YOL040C,YOR293W	GO:0006407
rRNA transport	0.00448168	YGR214W,YJR123W,YLR048W,YNL178W,YOL040C,YOR293W	GO:0051029
ribosomal small subunit assembly	0.00911625	YGR159C,YGR214W,YJR123W,YLR048W,YLR167W,YOL040C,YOR293W	GO:0000028
gene expression	0.018353	YAL003W,YAL035W,YAL036C,YBR079C,YDL075W,YDL081C,YDL184C,YDR083W,YDR087C,YDR225W,YDR432W,YEL054C,YER117W,YER120W,YGL135W,YGR034W,YGR093W,YGR103W,YGR159C,YGR214W,YHL015W,YHR062C,YHR156C,YHR178W,YIL021W,YIL041W,YIL051C,YIL126W,YIR009W,YJL138C,YJL189W,YJR123W,YKL180W,YKL214C,YKR022C,YLL002W,YLL036C,YLR029C,YLR033W,YLR048W,YLR051C,YLR075W,YLR103C,YLR115W,YLR150W,YLR167W,YLR203C,YLR222C,YLR249W,YLR262C…	GO:0010467

## Sheet: Short-TLS-GO-cellcomp-enrich
Category	BH-corrected p-value	Genes	Category Number
cytosolic ribosome	9.0485e-20	YAL035W,YDL075W,YDL081C,YDL184C,YEL054C,YER117W,YGL135W,YGR034W,YGR214W,YHL015W,YJL189W,YJR123W,YKL180W,YLR029C,YLR048W,YLR075W,YLR167W,YLR249W,YLR340W,YLR344W,YML063W,YMR116C,YNL178W,YOL040C,YOL120C,YOR063W,YOR293W,YPL090C,YPL143W	GO:0022626
cytosolic part	1.32192e-17	YAL035W,YDL075W,YDL081C,YDL184C,YDR212W,YEL054C,YER117W,YFR050C,YGL135W,YGR034W,YGR135W,YGR214W,YHL015W,YHR174W,YJL026W,YJL189W,YJR123W,YKL180W,YLR029C,YLR048W,YLR075W,YLR167W,YLR249W,YLR340W,YLR344W,YML063W,YMR116C,YNL178W,YOL040C,YOL120C,YOR063W,YOR293W,YPL090C,YPL143W	GO:0044445
ribosome	7.61919e-15	YAL035W,YAL036C,YDL075W,YDL081C,YDL184C,YEL054C,YER117W,YGL135W,YGR034W,YGR214W,YHL015W,YJL138C,YJL189W,YJR123W,YKL180W,YLR029C,YLR048W,YLR075W,YLR167W,YLR249W,YLR340W,YLR344W,YML063W,YMR116C,YNL081C,YNL177C,YNL178W,YOL040C,YOL120C,YOR063W,YOR150W,YOR293W,YPL090C,YPL143W	GO:0005840
ribosomal subunit	9.94785e-15	YAL035W,YDL075W,YDL081C,YDL184C,YEL054C,YER117W,YGL135W,YGR034W,YGR214W,YHL015W,YJL189W,YJR123W,YKL180W,YLR029C,YLR048W,YLR075W,YLR167W,YLR340W,YLR344W,YML063W,YMR116C,YNL081C,YNL177C,YNL178W,YOL040C,YOL120C,YOR063W,YOR150W,YOR293W,YPL090C,YPL143W	GO:0044391
intracellular ribonucleoprotein complex	1.41284e-11	YAL035W,YAL036C,YBR079C,YDL075W,YDL081C,YDL184C,YDR083W,YDR087C,YDR432W,YEL054C,YER117W,YGL135W,YGR034W,YGR103W,YGR214W,YHL015W,YHR052W,YHR062C,YHR156C,YIR009W,YJL138C,YJL189W,YJR123W,YKL180W,YKR022C,YLL036C,YLR029C,YLR048W,YLR075W,YLR150W,YLR167W,YLR222C,YLR249W,YLR323C,YLR340W,YLR344W,YML063W,YMR116C,YMR309C,YNL081C,YNL177C,YNL178W,YOL040C,YOL120C,YOR063W,YOR150W,YOR293W,YPL090C,YPL143W,YPL243W	GO:0030529
ribonucleoprotein complex	1.41284e-11	YAL035W,YAL036C,YBR079C,YDL075W,YDL081C,YDL184C,YDR083W,YDR087C,YDR432W,YEL054C,YER117W,YGL135W,YGR034W,YGR103W,YGR214W,YHL015W,YHR052W,YHR062C,YHR156C,YIR009W,YJL138C,YJL189W,YJR123W,YKL180W,YKR022C,YLL036C,YLR029C,YLR048W,YLR075W,YLR150W,YLR167W,YLR222C,YLR249W,YLR323C,YLR340W,YLR344W,YML063W,YMR116C,YMR309C,YNL081C,YNL177C,YNL178W,YOL040C,YOL120C,YOR063W,YOR150W,YOR293W,YPL090C,YPL143W,YPL243W	GO:1990904
cytosolic large ribosomal subunit	1.1649e-09	YDL075W,YDL081C,YDL184C,YEL054C,YER117W,YGL135W,YGR034W,YJL189W,YKL180W,YLR029C,YLR075W,YLR340W,YLR344W,YOL120C,YOR063W,YPL143W	GO:0022625
cytosolic small ribosomal subunit	1.10076e-07	YAL035W,YGR214W,YHL015W,YJR123W,YLR048W,YLR167W,YML063W,YMR116C,YNL178W,YOL040C,YOR293W,YPL090C	GO:0022627
large ribosomal subunit	1.23209e-07	YDL075W,YDL081C,YDL184C,YEL054C,YER117W,YGL135W,YGR034W,YJL189W,YKL180W,YLR029C,YLR075W,YLR340W,YLR344W,YNL177C,YOL120C,YOR063W,YOR150W,YPL143W	GO:0015934
cytosol	7.1182e-06	YAL035W,YBL058W,YDL022W,YDL075W,YDL081C,YDL184C,YDR212W,YEL054C,YER091C,YER117W,YFR050C,YGL135W,YGR034W,YGR093W,YGR135W,YGR204W,YGR209C,YGR214W,YHL015W,YHR062C,YHR174W,YIL041W,YJL026W,YJL055W,YJL159W,YJL189W,YJR123W,YKL180W,YLL036C,YLR029C,YLR044C,YLR048W,YLR075W,YLR167W,YLR249W,YLR293C,YLR340W,YLR344W,YML063W,YMR116C,YNL178W,YOL040C,YOL120C,YOR063W,YOR293W,YPL090C,YPL113C,YPL143W	GO:0005829
small ribosomal subunit	5.92338e-05	YAL035W,YGR214W,YHL015W,YJR123W,YLR048W,YLR167W,YML063W,YMR116C,YNL081C,YNL178W,YOL040C,YOR293W,YPL090C	GO:0015935

## Sheet: Short-TLS-GO-MolFunc-enrich
Category	BH-corrected p-value	Genes	Category Number
structural constituent of ribosome	8.49866e-13	YDL075W,YDL081C,YDL184C,YEL054C,YER117W,YGL135W,YGR034W,YGR214W,YHL015W,YJL189W,YJR123W,YKL180W,YLR029C,YLR048W,YLR075W,YLR167W,YLR340W,YLR344W,YML063W,YNL081C,YNL177C,YNL178W,YOL040C,YOL120C,YOR063W,YOR150W,YOR293W,YPL090C,YPL143W	GO:0003735
structural molecule activity	5.61581e-08	YDL075W,YDL081C,YDL184C,YEL054C,YER011W,YER117W,YGL135W,YGR034W,YGR214W,YHL015W,YJL159W,YJL189W,YJR123W,YKL180W,YLR029C,YLR048W,YLR075W,YLR110C,YLR167W,YLR340W,YLR344W,YML063W,YNL081C,YNL177C,YNL178W,YOL040C,YOL120C,YOR063W,YOR150W,YOR293W,YPL090C,YPL143W	GO:0005198
RNA binding	0.0010765	YAL003W,YAL035W,YBR079C,YDL075W,YDR432W,YEL054C,YER117W,YGL135W,YGR034W,YGR103W,YGR159C,YHL015W,YHR062C,YIR001C,YIR009W,YJL138C,YJL189W,YJR123W,YKL180W,YKL214C,YLR029C,YLR075W,YLR115W,YLR222C,YLR249W,YLR340W,YLR344W,YMR309C,YNL081C,YNL177C,YNL178W,YOL040C,YOL120C,YOR063W,YOR150W,YOR293W,YPL143W,YPL243W	GO:0003723
poly(A) RNA binding	0.0314812	YBR079C,YDL075W,YDR432W,YEL054C,YER117W,YGR034W,YGR103W,YGR159C,YHL015W,YJR123W,YKL180W,YLR029C,YLR075W,YLR344W,YMR309C,YNL177C,YOL040C,YOR063W,YOR150W,YOR293W,YPL143W	GO:0044822

## Sheet: Short-TLS-KEGG-Pathway
Category	BH-corrected p-value	Genes	KEGG / Reactome code
glucose fermentation	0.00135016	YAL038W,YBR145W,YBR196C,YCR012W,YGL253W,YHR174W,YKL152C,YLR044C,YOL086C	GLUCFERMEN-PWY

## Sheet: Long-TLS-GO-BioProcess-enrich
Category	BH-corrected p-value	Genes	Category Number
biological regulation	0.000151793	YAL016W,YAL023C,YBL020W,YBL022C,YBL067C,YBR059C,YBR212W,YBR214W,YBR276C,YCL051W,YCR027C,YDL020C,YDL073W,YDL077C,YDL122W,YDL132W,YDL155W,YDL160C,YDL185W,YDL188C,YDR028C,YDR043C,YDR093W,YDR144C,YDR169C,YDR180W,YDR284C,YDR363W,YDR382W,YDR389W,YDR407C,YDR466W,YDR477W,YDR492W,YEL037C,YER040W,YER059W,YER064C,YER075C,YER107C,YER114C,YER123W,YER125W,YER165W,YER167W,YFL024C,YGL014W,YGL019W,YGL116W,YGL173C…	GO:0065007
regulation of biological process	0.000422907	YAL016W,YAL023C,YBL022C,YBL067C,YBR059C,YBR212W,YBR214W,YBR276C,YCL051W,YCR027C,YDL020C,YDL073W,YDL077C,YDL122W,YDL132W,YDL155W,YDL160C,YDL188C,YDR028C,YDR043C,YDR144C,YDR169C,YDR180W,YDR284C,YDR363W,YDR382W,YDR389W,YDR466W,YDR477W,YEL037C,YER040W,YER059W,YER064C,YER075C,YER107C,YER114C,YER123W,YER125W,YER165W,YER167W,YFL024C,YGL014W,YGL019W,YGL116W,YGL173C,YGL215W,YGL216W,YGR014W,YGR054W,YGR098C…	GO:0050789
regulation of cellular process	0.000509183	YAL016W,YAL023C,YBL022C,YBL067C,YBR059C,YBR212W,YBR214W,YBR276C,YCL051W,YCR027C,YDL020C,YDL073W,YDL077C,YDL122W,YDL132W,YDL155W,YDL160C,YDL188C,YDR028C,YDR043C,YDR144C,YDR169C,YDR284C,YDR363W,YDR382W,YDR389W,YDR466W,YDR477W,YEL037C,YER040W,YER059W,YER064C,YER075C,YER107C,YER114C,YER123W,YER125W,YER165W,YER167W,YFL024C,YGL014W,YGL019W,YGL116W,YGL173C,YGL215W,YGL216W,YGR014W,YGR054W,YGR098C,YGR178C…	GO:0050794
cell communication	0.000633834	YAL023C,YBR214W,YBR276C,YCR027C,YDL073W,YDL077C,YDR028C,YDR043C,YDR144C,YDR169C,YDR284C,YDR389W,YDR466W,YDR477W,YER040W,YER075C,YER114C,YER123W,YFR021W,YGR014W,YHL020C,YHR079C,YHR102W,YIL036W,YKL176C,YKR014C,YKR028W,YLR006C,YLR096W,YLR208W,YLR229C,YLR422W,YNL127W,YNL190W,YNL201C,YNR031C,YOL013C,YOR008C,YOR014W,YOR208W,YOR290C,YOR360C,YPL016W,YPL115C,YPL204W,YPL256C,YPR165W,YPR185W	GO:0007154
positive regulation of cellular process	0.00162511	YDL020C,YDL077C,YDL132W,YDL155W,YDR169C,YDR363W,YDR382W,YDR477W,YER040W,YER125W,YFL024C,YGL014W,YGL116W,YGL173C,YGL215W,YGR098C,YGR178C,YHL020C,YHR084W,YHR102W,YIL036W,YIL131C,YJL092W,YKL112W,YKL176C,YKR042W,YKR099W,YLR006C,YLR208W,YLR223C,YLR228C,YLR229C,YLR342W,YLR451W,YML007W,YMR273C,YNL127W,YNL201C,YNL271C,YNR031C,YOL116W,YOR008C,YOR290C,YOR322C,YOR344C,YPL016W,YPL145C,YPL204W,YPR005C,YPR072W…	GO:0048522
single-organism process	0.00177971	YAL016W,YAL023C,YBL020W,YBL030C,YBL067C,YBL084C,YBL099W,YBR054W,YBR059C,YBR069C,YBR102C,YBR201W,YBR214W,YBR221C,YBR276C,YCR027C,YDL055C,YDL073W,YDL077C,YDL117W,YDL132W,YDL155W,YDL185W,YDL188C,YDL205C,YDR028C,YDR043C,YDR093W,YDR113C,YDR144C,YDR160W,YDR169C,YDR177W,YDR178W,YDR180W,YDR251W,YDR284C,YDR335W,YDR363W,YDR380W,YDR389W,YDR466W,YDR477W,YDR492W,YEL013W,YEL037C,YER040W,YER052C,YER059W,YER075C…	GO:0044699
cellular response to stimulus	0.00185696	YAL023C,YBL022C,YBR201W,YBR214W,YBR276C,YCR027C,YDL020C,YDL073W,YDL077C,YDL102W,YDR028C,YDR043C,YDR093W,YDR113C,YDR144C,YDR169C,YDR177W,YDR180W,YDR284C,YDR363W,YDR389W,YDR466W,YDR477W,YEL037C,YER040W,YER075C,YER107C,YER114C,YER123W,YER125W,YFL024C,YFR021W,YGL019W,YGL044C,YGL094C,YGR014W,YGR184C,YHL020C,YHR079C,YHR084W,YHR102W,YIL036W,YIL131C,YJL073W,YJL092W,YJL127C,YJR090C,YKL112W,YKL176C,YKR014C…	GO:0051716
single-organism cellular process	0.00185838	YAL016W,YAL023C,YBL020W,YBL030C,YBL067C,YBL084C,YBL099W,YBR059C,YBR069C,YBR102C,YBR201W,YBR214W,YBR221C,YBR276C,YCR027C,YDL055C,YDL073W,YDL077C,YDL117W,YDL132W,YDL155W,YDL185W,YDL188C,YDL205C,YDR028C,YDR043C,YDR093W,YDR113C,YDR144C,YDR160W,YDR169C,YDR177W,YDR178W,YDR180W,YDR251W,YDR284C,YDR363W,YDR380W,YDR389W,YDR466W,YDR477W,YDR492W,YEL013W,YEL037C,YER040W,YER052C,YER059W,YER075C,YER114C,YER123W…	GO:0044763
regulation of protein kinase activity	0.00186447	YBR276C,YCL051W,YDL073W,YDL155W,YDR382W,YER059W,YER075C,YGL116W,YHR102W,YLR006C,YMR199W,YNR031C,YOR208W,YPL256C,YPR185W	GO:0045859
positive regulation of biological process	0.00194918	YDL020C,YDL077C,YDL132W,YDL155W,YDR169C,YDR363W,YDR382W,YDR477W,YER040W,YER125W,YER167W,YFL024C,YGL014W,YGL116W,YGL173C,YGL215W,YGR098C,YGR178C,YHL020C,YHR084W,YHR102W,YIL036W,YIL131C,YJL092W,YKL112W,YKL176C,YKR042W,YKR099W,YLR006C,YLR208W,YLR223C,YLR228C,YLR229C,YLR342W,YLR451W,YML007W,YMR273C,YNL127W,YNL201C,YNL271C,YNR031C,YOL116W,YOR008C,YOR290C,YOR322C,YOR344C,YPL016W,YPL145C,YPL204W,YPR005C…	GO:0048518
regulation of transferase activity	0.002004	YBR276C,YCL051W,YDL073W,YDL132W,YDL155W,YDR382W,YER059W,YER075C,YGL116W,YHR102W,YLR006C,YML061C,YMR199W,YNR031C,YOR208W,YPL256C,YPR185W	GO:0051338
regulation of kinase activity	0.00220212	YBR276C,YCL051W,YDL073W,YDL155W,YDR382W,YER059W,YER075C,YGL116W,YHR102W,YLR006C,YMR199W,YNR031C,YOR208W,YPL256C,YPR185W	GO:0043549
regulation of cellular protein metabolic process	0.00234773	YAL016W,YBL067C,YBR212W,YBR276C,YCL051W,YDL020C,YDL073W,YDL122W,YDL132W,YDL155W,YDL160C,YDL188C,YDR363W,YDR382W,YDR477W,YER059W,YER075C,YER125W,YER165W,YGL014W,YGL116W,YGR054W,YGR098C,YGR178C,YHR102W,YLR006C,YMR199W,YMR304W,YNL186W,YNR031C,YOR208W,YPL256C,YPR072W,YPR185W	GO:0032268
regulation of mitotic cell cycle	0.00284232	YAL016W,YBR214W,YDL132W,YDL155W,YDL188C,YDR363W,YGL116W,YGL173C,YGL216W,YGR098C,YGR229C,YHR102W,YIL131C,YLR229C,YMR198W,YMR273C,YNL127W,YNL164C,YNR031C,YOR014W,YPR165W	GO:0007346
signaling	0.00287464	YAL023C,YBR276C,YCR027C,YDL073W,YDL077C,YDR144C,YDR284C,YDR389W,YDR466W,YDR477W,YER075C,YER114C,YER123W,YGR014W,YHL020C,YHR079C,YHR102W,YKL176C,YKR014C,YKR028W,YLR006C,YLR096W,YLR208W,YLR229C,YLR422W,YNL127W,YNL201C,YNR031C,YOL013C,YOR008C,YOR014W,YOR208W,YOR360C,YPL115C,YPL204W,YPL256C,YPR165W	GO:0023052
regulation of protein metabolic process	0.00288019	YAL016W,YBL067C,YBR212W,YBR276C,YCL051W,YDL020C,YDL073W,YDL122W,YDL132W,YDL155W,YDL160C,YDL188C,YDR363W,YDR382W,YDR477W,YER059W,YER075C,YER125W,YER165W,YGL014W,YGL116W,YGR054W,YGR098C,YGR178C,YHR102W,YLR006C,YMR199W,YMR304W,YNL186W,YNR031C,YOR208W,YPL256C,YPR072W,YPR185W	GO:0051246
signal transduction	0.00301812	YAL023C,YBR276C,YCR027C,YDL073W,YDL077C,YDR144C,YDR284C,YDR389W,YDR466W,YDR477W,YER075C,YER114C,YER123W,YGR014W,YHL020C,YHR079C,YHR102W,YKL176C,YKR014C,YKR028W,YLR006C,YLR096W,YLR208W,YLR229C,YLR422W,YNL127W,YNL201C,YNR031C,YOL013C,YOR008C,YOR014W,YOR208W,YOR360C,YPL115C,YPL204W,YPL256C,YPR165W	GO:0007165
single organism signaling	0.00301812	YAL023C,YBR276C,YCR027C,YDL073W,YDL077C,YDR144C,YDR284C,YDR389W,YDR466W,YDR477W,YER075C,YER114C,YER123W,YGR014W,YHL020C,YHR079C,YHR102W,YKL176C,YKR014C,YKR028W,YLR006C,YLR096W,YLR208W,YLR229C,YLR422W,YNL127W,YNL201C,YNR031C,YOL013C,YOR008C,YOR014W,YOR208W,YOR360C,YPL115C,YPL204W,YPL256C,YPR165W	GO:0044700
regulation of catalytic activity	0.00338124	YBR276C,YCL051W,YDL073W,YDL132W,YDL155W,YDR382W,YDR389W,YDR407C,YER059W,YER075C,YGL116W,YGR098C,YHR102W,YJL092W,YKL176C,YLR006C,YLR208W,YML061C,YMR199W,YNR031C,YOR208W,YPL145C,YPL256C,YPR185W	GO:0050790
regulation of catabolic process	0.00427757	YBL067C,YDL020C,YDL122W,YDL132W,YER059W,YER125W,YER165W,YGL116W,YMR304W,YNL186W,YOL116W,YOL136C,YOR344C	GO:0009894
growth	0.00441828	YAL023C,YDL188C,YDR043C,YDR144C,YDR251W,YDR477W,YER114C,YER129W,YGR014W,YHR084W,YHR102W,YIL129C,YIL131C,YKL046C,YLR228C,YLR229C,YLR353W,YNL271C,YNL294C,YOL116W,YOR290C,YOR326W,YPR165W	GO:0040007
regulation of macromolecule metabolic process	0.00445241	YAL016W,YBL022C,YBL067C,YBR212W,YBR276C,YCL051W,YDL020C,YDL073W,YDL122W,YDL132W,YDL155W,YDL160C,YDL188C,YDR028C,YDR043C,YDR169C,YDR180W,YDR363W,YDR382W,YDR477W,YEL037C,YER040W,YER059W,YER064C,YER075C,YER107C,YER125W,YER165W,YER167W,YFL024C,YGL014W,YGL019W,YGL116W,YGL173C,YGR054W,YGR098C,YGR178C,YGR229C,YHL020C,YHR079C,YHR084W,YHR102W,YIL036W,YIL131C,YJL019W,YJL092W,YJL127C,YKL112W,YKR042W,YKR099W…	GO:0060255
regulation of phosphorylation	0.00447739	YBR276C,YCL051W,YDL073W,YDL155W,YDR382W,YER059W,YER075C,YGL116W,YHR102W,YLR006C,YMR199W,YNR031C,YOL136C,YOR208W,YOR344C,YPL256C,YPR185W	GO:0042325
response to stimulus	0.00450062	YAL023C,YBL022C,YBR201W,YBR214W,YBR276C,YCR027C,YDL020C,YDL073W,YDL077C,YDL102W,YDR028C,YDR043C,YDR093W,YDR113C,YDR144C,YDR160W,YDR169C,YDR177W,YDR180W,YDR284C,YDR363W,YDR389W,YDR466W,YDR477W,YEL037C,YER040W,YER075C,YER107C,YER114C,YER123W,YER125W,YFL024C,YFR021W,YGL019W,YGL044C,YGL094C,YGR014W,YGR184C,YHL020C,YHR079C,YHR084W,YHR102W,YIL036W,YIL131C,YJL073W,YJL092W,YJL127C,YJR090C,YKL112W,YKL176C…	GO:0050896
regulation of response to stimulus	0.00467044	YAL023C,YBR276C,YDL020C,YDL073W,YDL077C,YDR043C,YDR389W,YDR477W,YER075C,YER107C,YER125W,YJL092W,YKL176C,YLR006C,YLR208W,YLR228C,YLR229C,YNL127W,YNL201C,YOR208W,YPL115C,YPL256C,YPR165W	GO:0048583
regulation of phosphate metabolic process	0.00476617	YBR276C,YCL051W,YDL073W,YDL155W,YDR382W,YER059W,YER075C,YER125W,YGL116W,YGR098C,YHR102W,YLR006C,YMR199W,YNR031C,YOL136C,YOR086C,YOR208W,YOR344C,YPL145C,YPL256C,YPR185W	GO:0019220
regulation of phosphorus metabolic process	0.00476617	YBR276C,YCL051W,YDL073W,YDL155W,YDR382W,YER059W,YER075C,YER125W,YGL116W,YGR098C,YHR102W,YLR006C,YMR199W,YNR031C,YOL136C,YOR086C,YOR208W,YOR344C,YPL145C,YPL256C,YPR185W	GO:0051174
regulation of metabolic process	0.00548143	YAL016W,YBL022C,YBL067C,YBR212W,YBR276C,YCL051W,YDL020C,YDL073W,YDL122W,YDL132W,YDL155W,YDL160C,YDL188C,YDR028C,YDR043C,YDR169C,YDR180W,YDR363W,YDR382W,YDR477W,YEL037C,YER040W,YER059W,YER064C,YER075C,YER107C,YER125W,YER165W,YER167W,YFL024C,YGL014W,YGL019W,YGL116W,YGL173C,YGR054W,YGR098C,YGR178C,YGR229C,YHL020C,YHR079C,YHR084W,YHR102W,YIL036W,YIL131C,YJL019W,YJL092W,YJL127C,YKL112W,YKR042W,YKR099W…	GO:0019222
cellular response to abiotic stimulus	0.00638279	YDL073W,YDR043C,YER075C,YER125W,YGR014W,YLL010C,YLR006C,YNL190W,YNL294C,YNR031C,YOL116W,YOR208W	GO:0071214
phosphate-containing compound metabolic process	0.00647337	YBL099W,YBR059C,YBR125C,YBR221C,YBR276C,YCL051W,YDL073W,YDL155W,YDL185W,YDL188C,YDR178W,YDR284C,YDR382W,YDR466W,YDR477W,YER052C,YER059W,YER075C,YER123W,YER125W,YER129W,YGL019W,YGR098C,YGR205W,YHL011C,YHL020C,YHR079C,YHR102W,YJL155C,YKL004W,YKR028W,YLL019C,YLR006C,YLR096W,YLR450W,YML016C,YMR054W,YMR199W,YNL032W,YNL201C,YNL220W,YNR031C,YOL136C,YOR014W,YOR039W,YOR086C,YOR095C,YOR142W,YOR208W,YOR270C…	GO:0006796
positive regulation of endocytosis	0.00650071	YER125W,YLR342W,YOR008C,YOR322C,YPL204W,YPR165W	GO:0045807
regulation of endocytosis	0.00659229	YBR059C,YER125W,YLR342W,YOR008C,YOR322C,YPL204W,YPR165W	GO:0030100
regulation of molecular function	0.00759144	YBR276C,YCL051W,YDL073W,YDL132W,YDL155W,YDR382W,YDR389W,YDR407C,YER059W,YER075C,YGL116W,YGR098C,YHR102W,YJL092W,YKL176C,YLR006C,YLR208W,YML061C,YMR199W,YNR031C,YOR208W,YPL145C,YPL256C,YPR185W	GO:0065009
regulation of cell cycle	0.00774654	YAL016W,YBR214W,YDL132W,YDL155W,YDL188C,YDR363W,YER059W,YER167W,YGL116W,YGL173C,YGL216W,YGR098C,YGR229C,YHR102W,YIL131C,YJR090C,YLR229C,YMR198W,YMR199W,YMR273C,YNL127W,YNL164C,YNL201C,YNR031C,YOR014W,YPL256C,YPR165W	GO:0051726
protein phosphorylation	0.00785151	YBR059C,YBR276C,YCL051W,YDL073W,YDL155W,YDR382W,YDR466W,YDR477W,YER059W,YER075C,YER123W,YER129W,YGL019W,YHR079C,YHR102W,YLL019C,YLR006C,YLR096W,YMR199W,YNR031C,YOR039W,YOR208W,YPL204W,YPL256C,YPR185W	GO:0006468
regulation of protein phosphorylation	0.00807413	YBR276C,YCL051W,YDL073W,YDL155W,YDR382W,YER059W,YER075C,YGL116W,YHR102W,YLR006C,YMR199W,YNR031C,YOR208W,YPL256C,YPR185W	GO:0001932
regulation of cellular catabolic process	0.00838963	YBL067C,YDL020C,YDL122W,YDL132W,YER059W,YER125W,YER165W,YMR304W,YNL186W,YOL116W,YOR344C	GO:0031329
phosphorus metabolic process	0.00855756	YBL099W,YBR059C,YBR125C,YBR221C,YBR276C,YCL051W,YDL073W,YDL155W,YDL185W,YDL188C,YDR178W,YDR284C,YDR382W,YDR466W,YDR477W,YER052C,YER059W,YER075C,YER123W,YER125W,YER129W,YGL019W,YGR098C,YGR205W,YHL011C,YHL020C,YHR079C,YHR102W,YJL155C,YKL004W,YKR028W,YLL019C,YLR006C,YLR096W,YLR450W,YML016C,YMR054W,YMR199W,YNL032W,YNL201C,YNL220W,YNR031C,YOL136C,YOR014W,YOR039W,YOR086C,YOR095C,YOR142W,YOR208W,YOR270C…	GO:0006793
response to organic substance	0.0097944	YAL023C,YBR201W,YDR028C,YDR093W,YDR160W,YDR177W,YDR477W,YEL037C,YER040W,YER075C,YER125W,YGR184C,YHL020C,YHR079C,YHR084W,YIL036W,YIL131C,YJL073W,YJR090C,YLR208W,YLR229C,YLR378C,YNL127W,YNL201C,YOL013C,YOL116W,YOR153W,YPL256C	GO:0010033
cellular protein modification process	0.0101932	YAL023C,YBL067C,YBL084C,YBR059C,YBR125C,YBR165W,YBR276C,YCL051W,YDL055C,YDL073W,YDL122W,YDL132W,YDL155W,YDL188C,YDL205C,YDR177W,YDR363W,YDR382W,YDR466W,YDR477W,YEL037C,YER059W,YER075C,YER123W,YER125W,YER129W,YFL009W,YFL024C,YFR021W,YGL019W,YGL116W,YGR098C,YGR184C,YHR079C,YHR102W,YJL127C,YJR090C,YLL019C,YLR006C,YLR096W,YML016C,YML111W,YMR199W,YMR304W,YNL032W,YNL186W,YNL201C,YNL219C,YNR031C,YNR051C…	GO:0006464
protein modification process	0.0101932	YAL023C,YBL067C,YBL084C,YBR059C,YBR125C,YBR165W,YBR276C,YCL051W,YDL055C,YDL073W,YDL122W,YDL132W,YDL155W,YDL188C,YDL205C,YDR177W,YDR363W,YDR382W,YDR466W,YDR477W,YEL037C,YER059W,YER075C,YER123W,YER125W,YER129W,YFL009W,YFL024C,YFR021W,YGL019W,YGL116W,YGR098C,YGR184C,YHR079C,YHR102W,YJL127C,YJR090C,YLL019C,YLR006C,YLR096W,YML016C,YML111W,YMR199W,YMR304W,YNL032W,YNL186W,YNL201C,YNL219C,YNR031C,YNR051C…	GO:0036211
regulation of cellular metabolic process	0.0111043	YAL016W,YBL022C,YBL067C,YBR212W,YBR276C,YCL051W,YDL020C,YDL073W,YDL122W,YDL132W,YDL155W,YDL160C,YDL188C,YDR028C,YDR043C,YDR169C,YDR363W,YDR382W,YDR477W,YEL037C,YER040W,YER059W,YER064C,YER075C,YER125W,YER165W,YFL024C,YGL014W,YGL019W,YGL116W,YGL173C,YGR054W,YGR098C,YGR178C,YGR229C,YHL020C,YHR079C,YHR084W,YHR102W,YIL036W,YIL131C,YJL019W,YJL092W,YJL127C,YKL112W,YKR042W,YKR099W,YLL019C,YLR006C,YLR208W…	GO:0031323
budding cell bud growth	0.0128911	YDL188C,YER114C,YHR102W,YIL129C,YKL046C,YLR229C,YNL271C,YOR326W,YPR165W	GO:0007117
regulation of protein modification process	0.0157264	YBR276C,YCL051W,YDL073W,YDL132W,YDL155W,YDR363W,YDR382W,YER059W,YER075C,YGL116W,YGR098C,YHR102W,YLR006C,YMR199W,YNR031C,YOR208W,YPL256C,YPR185W	GO:0031399
proteasome-mediated ubiquitin-dependent protein catabolic process	0.0193065	YAL023C,YBL067C,YBL084C,YBR201W,YDL020C,YDL122W,YDL132W,YDR177W,YEL037C,YER125W,YFL009W,YGL116W,YGR184C,YJL073W,YJR090C,YLR208W,YLR378C,YMR304W,YNL186W,YOL013C	GO:0043161
positive regulation of transport	0.0195041	YER125W,YLR228C,YLR229C,YLR342W,YOR008C,YOR322C,YPL204W,YPR165W	GO:0051050
dephosphorylation	0.0196841	YBR125C,YBR276C,YDL188C,YDR284C,YER075C,YGR098C,YKR028W,YML016C,YNL032W,YNL201C,YOR014W,YOR086C,YOR208W,YPL145C	GO:0016311
intracellular signal transduction	0.0206483	YBR276C,YCR027C,YDL073W,YDL077C,YDR389W,YDR466W,YDR477W,YER075C,YER114C,YHR102W,YKL176C,YKR014C,YKR028W,YLR006C,YLR096W,YLR208W,YLR229C,YLR422W,YNL201C,YNR031C,YOR008C,YOR208W,YOR360C,YPL115C,YPR165W	GO:0035556
regulation of protein serine/threonine kinase activity	0.0208713	YBR276C,YDL073W,YDL155W,YER059W,YER075C,YGL116W,YLR006C,YMR199W,YOR208W,YPL256C	GO:0071900
positive regulation of metabolic process	0.0209816	YDL020C,YDL132W,YDR169C,YDR363W,YDR382W,YDR477W,YER040W,YER125W,YER167W,YGL014W,YGL116W,YGL173C,YGR178C,YHL020C,YHR084W,YHR102W,YIL036W,YIL131C,YJL092W,YKL112W,YKR042W,YKR099W,YLR006C,YLR208W,YLR223C,YLR228C,YLR451W,YML007W,YNL201C,YNR031C,YOL116W,YOR290C,YOR322C,YOR344C,YPL016W,YPL145C,YPR005C,YPR072W,YPR104C,YPR185W	GO:0009893
regulation of primary metabolic process	0.0211449	YAL016W,YBL022C,YBL067C,YBR212W,YBR276C,YCL051W,YDL020C,YDL073W,YDL122W,YDL132W,YDL155W,YDL160C,YDL188C,YDR028C,YDR043C,YDR169C,YDR363W,YDR382W,YDR477W,YEL037C,YER040W,YER059W,YER064C,YER075C,YER125W,YER165W,YFL024C,YGL014W,YGL019W,YGL116W,YGL173C,YGR054W,YGR098C,YGR178C,YGR229C,YHL020C,YHR079C,YHR084W,YHR102W,YIL036W,YIL131C,YJL019W,YJL092W,YJL127C,YKL112W,YKR042W,YKR099W,YLL019C,YLR006C,YLR208W…	GO:0080090
proteasomal protein catabolic process	0.0215464	YAL023C,YBL067C,YBL084C,YBR201W,YDL020C,YDL122W,YDL132W,YDR177W,YEL037C,YER125W,YFL009W,YGL116W,YGR184C,YJL073W,YJR090C,YLR208W,YLR378C,YMR304W,YNL186W,YOL013C	GO:0010498
regulation of developmental process	0.0222175	YER075C,YER123W,YER125W,YLR229C,YLR342W,YOR208W,YOR290C,YPL016W,YPL204W	GO:0050793
cell wall organization or biogenesis	0.0226597	YAL023C,YCL051W,YDL055C,YDR144C,YDR389W,YDR466W,YDR477W,YER033C,YGR229C,YHL011C,YHR079C,YHR102W,YHR142W,YKL046C,YKR042W,YLR300W,YLR342W,YMR273C,YNL294C,YOL013C,YOR008C,YOR208W,YPR165W	GO:0071554
protein autophosphorylation	0.0246237	YHR079C,YLL019C,YLR006C,YLR096W,YNR031C,YPL204W	GO:0046777
regulation of proteolysis involved in cellular protein catabolic process	0.0254825	YBL067C,YDL020C,YDL122W,YDL132W,YER125W,YMR304W,YNL186W	GO:1903050
regulation of cellular protein catabolic process	0.0254825	YBL067C,YDL020C,YDL122W,YDL132W,YER125W,YMR304W,YNL186W	GO:1903362
regulation of localization	0.0258768	YBR059C,YDL077C,YDL188C,YER075C,YER107C,YER125W,YGR184C,YLR228C,YLR229C,YLR342W,YMR273C,YNL271C,YNR051C,YOR008C,YOR208W,YOR322C,YPL204W,YPR165W	GO:0032879
positive regulation of cellular metabolic process	0.0258935	YDL020C,YDL132W,YDR169C,YDR363W,YDR382W,YDR477W,YER040W,YER125W,YGL014W,YGL116W,YGL173C,YGR178C,YHL020C,YHR084W,YHR102W,YIL036W,YIL131C,YJL092W,YKL112W,YKR042W,YKR099W,YLR006C,YLR208W,YLR223C,YLR228C,YLR451W,YML007W,YNL201C,YNR031C,YOL116W,YOR290C,YOR322C,YOR344C,YPL016W,YPL145C,YPR005C,YPR072W,YPR104C,YPR185W	GO:0031325
signal transduction by protein phosphorylation	0.0267346	YBR276C,YDL073W,YDR466W,YER075C,YHR102W,YLR006C,YNR031C,YOR208W	GO:0023014
regulation of protein catabolic process	0.0267346	YBL067C,YDL020C,YDL122W,YDL132W,YER125W,YGL116W,YMR304W,YNL186W	GO:0042176
protein dephosphorylation	0.0304016	YBR125C,YBR276C,YDL188C,YER075C,YGR098C,YML016C,YNL032W,YNL201C,YOR014W,YOR208W	GO:0006470
external encapsulating structure organization	0.0307341	YAL023C,YCL051W,YDR144C,YDR389W,YDR477W,YER033C,YGR229C,YHL011C,YHR079C,YHR102W,YHR142W,YKL046C,YKR042W,YLR300W,YLR342W,YMR273C,YOL013C,YOR008C,YPR165W	GO:0045229
cell wall organization	0.0307341	YAL023C,YCL051W,YDR144C,YDR389W,YDR477W,YER033C,YGR229C,YHL011C,YHR079C,YHR102W,YHR142W,YKL046C,YKR042W,YLR300W,YLR342W,YMR273C,YOL013C,YOR008C,YPR165W	GO:0071555
negative regulation of protein kinase activity	0.031601	YBR276C,YCL051W,YDL073W,YER075C,YGL116W,YOR208W	GO:0006469
fungal-type cell wall organization or biogenesis	0.0324691	YAL023C,YCL051W,YDR144C,YDR389W,YDR477W,YER033C,YGR229C,YHL011C,YHR079C,YHR102W,YHR142W,YKL046C,YKR042W,YLR300W,YNL294C,YOL013C,YOR008C,YPR165W	GO:0071852
regulation of response to stress	0.0335088	YAL023C,YDL020C,YDR043C,YDR477W,YER075C,YER107C,YJL092W,YLR006C,YLR228C,YNL201C,YOR208W	GO:0080134
establishment of localization	0.0342052	YAL023C,YBL020W,YBL030C,YBL099W,YBR054W,YBR059C,YBR069C,YBR102C,YBR165W,YBR201W,YBR214W,YCR027C,YDL077C,YDL160C,YDL185W,YDL195W,YDR093W,YDR160W,YDR180W,YDR335W,YDR407C,YEL013W,YER107C,YER123W,YER125W,YER165W,YFR021W,YGL139W,YGL140C,YGL206C,YGL216W,YGR090W,YGR119C,YGR184C,YHR026W,YHR050W,YHR079C,YHR142W,YIL022W,YIL048W,YIL090W,YIL115C,YJL019W,YJL129C,YJR095W,YKL154W,YKL176C,YKR014C,YKR051W,YLL028W…	GO:0051234
regulation of vesicle-mediated transport	0.0345413	YBR059C,YDL077C,YER125W,YLR229C,YLR342W,YNR051C,YOR008C,YOR322C,YPL204W,YPR165W	GO:0060627
phosphorylation	0.0368911	YBR059C,YBR221C,YBR276C,YCL051W,YDL073W,YDL155W,YDR178W,YDR382W,YDR466W,YDR477W,YER052C,YER059W,YER075C,YER123W,YER129W,YGL019W,YGR205W,YHL011C,YHR079C,YHR102W,YLL019C,YLR006C,YLR096W,YMR199W,YNR031C,YOL136C,YOR039W,YOR208W,YOR344C,YPL204W,YPL256C,YPR185W	GO:0016310
osmosensory signaling pathway	0.0405254	YDL073W,YER075C,YGR014W,YLR006C,YNR031C,YOR208W	GO:0007231
negative regulation of kinase activity	0.0405254	YBR276C,YCL051W,YDL073W,YER075C,YGL116W,YOR208W	GO:0033673
positive regulation of macromolecule metabolic process	0.0408734	YDL020C,YDL132W,YDR169C,YDR363W,YDR382W,YER040W,YER125W,YER167W,YGL014W,YGL116W,YGL173C,YGR178C,YHL020C,YHR084W,YHR102W,YIL036W,YIL131C,YJL092W,YKL112W,YKR042W,YKR099W,YLR006C,YLR208W,YLR223C,YLR228C,YLR451W,YML007W,YNL201C,YNR031C,YOL116W,YOR290C,YOR322C,YPL016W,YPR005C,YPR072W,YPR104C,YPR185W	GO:0010604
cell morphogenesis	0.0434142	YER123W,YER125W,YHR102W,YIL129C,YLR229C,YLR342W,YOR326W,YPL204W	GO:0000902
cellular response to osmotic stress	0.0458476	YDL073W,YDR043C,YER075C,YGR014W,YLL010C,YLR006C,YNR031C,YOL116W,YOR208W	GO:0071470
negative regulation of cellular protein metabolic process	0.0489345	YBR212W,YBR276C,YCL051W,YDL073W,YDL160C,YDR477W,YER075C,YGL014W,YGL116W,YGR098C,YOR208W,YPR072W	GO:0032269
negative regulation of protein metabolic process	0.0489345	YBR212W,YBR276C,YCL051W,YDL073W,YDL160C,YDR477W,YER075C,YGL014W,YGL116W,YGR098C,YOR208W,YPR072W	GO:0051248

## Sheet: Long-TLS-GO-CellComp-enrich
Category	BH-corrected p-value	Genes	Category Number
cellular bud	0.00321005	YAL016W,YBR054W,YBR059C,YBR102C,YCL051W,YDL117W,YDR093W,YDR251W,YER033C,YER114C,YER125W,YGR229C,YHR102W,YHR142W,YIL129C,YJR090C,YKL046C,YLL028W,YLR187W,YLR229C,YLR342W,YLR353W,YMR273C,YNL271C,YNR031C,YOR008C,YOR014W,YOR326W,YPL115C,YPL204W,YPR165W	GO:0005933
cellular bud tip	0.0145824	YAL016W,YBR102C,YER033C,YER125W,YHR142W,YLR187W,YLR229C,YLR342W,YLR353W,YMR273C,YNL271C,YNR031C,YOR326W,YPL115C,YPL204W,YPR165W	GO:0005934
site of polarized growth	0.0173479	YAL016W,YBR059C,YBR102C,YCL051W,YDL117W,YDL195W,YDR093W,YDR251W,YER033C,YER114C,YER125W,YGR014W,YGR229C,YHR102W,YHR142W,YIL129C,YJR090C,YLR187W,YLR229C,YLR342W,YLR353W,YMR273C,YNL271C,YNR031C,YOR008C,YOR014W,YOR326W,YPL115C,YPL204W,YPR165W	GO:0030427
incipient cellular bud site	0.0192231	YBR102C,YGR229C,YHR102W,YIL129C,YLR229C,YLR353W,YMR273C,YNL271C,YNR031C,YOR326W,YPL115C,YPR165W	GO:0000131
cell periphery	0.0230203	YBR054W,YBR059C,YBR069C,YBR102C,YCR027C,YDL117W,YDR093W,YDR144C,YDR160W,YDR284C,YDR389W,YER123W,YER125W,YFR021W,YGL206C,YGR014W,YIL048W,YIL090W,YIL129C,YJL129C,YJR090C,YKL046C,YKR014C,YKR042W,YLL010C,YLL028W,YLR096W,YLR187W,YLR208W,YLR219W,YLR229C,YLR300W,YLR342W,YLR353W,YLR422W,YML016C,YNL094W,YNL190W,YNL271C,YNL294C,YNL300W,YNR031C,YNR055C,YOR008C,YOR086C,YOR153W,YOR322C,YPL115C,YPL130W,YPL204W…	GO:0071944
cellular bud neck	0.0246295	YAL016W,YBR059C,YBR102C,YCL051W,YDL117W,YDR093W,YDR251W,YER033C,YER114C,YGR229C,YHR142W,YJR090C,YLR187W,YLR229C,YLR342W,YMR273C,YNL271C,YNR031C,YOR008C,YOR014W,YOR326W,YPL204W,YPR165W	GO:0005935
CURI complex	0.0348789	YGR090W,YLR223C,YOR039W,YPR104C	GO:0032545
