# Supplementary material for: Conserved non-AUG uORFs revealed by a novel regression analysis of ribosome profiling data
Source: Genome Res. 2018 Feb;28(2):214–22. doi: 10.1101/gr.221507.117 (PMC5793785; doi:10.1101/gr.221507.117)
Supplement: Supplemental Material [file supp_gr.221507.117_Supplemental_Table_S4.xlsx]

## Sheet: Sheet1
#Contents: uORF predictions for S. cerevisiae, S. paradoxus, S. uvarum.
# TIS Locus: Location of predicted uORFs TIS.	#uORF_ID: Unique identifer of uORF; Species_Gene_TISNucleotide	#AUG: TIS type. '1' == TIS is AUG. '0' == TIS is not AUG.	#NCC: TIS type. '1' == TIS is not AUG. '0' == TIS is AUG.	#UUG: TIS type. '1' == TIS is UUG. '0' == TIS is not UUG.	#Other: TIS type. '1' == TIS is not AUG or UUG. '0' == TIS is either UUG or AUG.	#Novel: '1' == uORF is 'Novel' (ie. does not have a significant overlap with another uORF in MSA), '0' == uORF is not Novel (see Methods)	#Seq_Cons: '1' == Sequence conserved analog uORF, '0' == No significant sequence conservation (see Methods)	#Position_Start: '1' == Conserved absolute position of TIS codon (uORF TIS codon in this species located within 5 nt of the TIS codon of a uORF in another species), '0' == No analogous TIS within 5nt	#Position_Stop: '1' == Conserved absolute position of Stop codon (uORF TIS codon in this species located within 5 nt of the TIS codon of a uORF in another species), '0' == No analogous stop within 5nt	#Minor_uORF: '1' == Minor uORF, uORF would be included in less than 50% of all measured transcripts, '0' == Not a minor uORF (See methods)	#Major_uORF: '1' == Major uORF, uORF would be included in 50% or more of all measured transcripts, '0' == Not a major uORF (See methods)	#gene: Parent gene of uORF	#Species: Species that uORF was identified in
TIS Location	uORF_ID	AUG	NCC	UUG	Other	Novel	Seq_Cons	Position_Start	Position_Stop	Minor_uORF	Major_uORF	gene	Species
Scer_chrI:143604-143607	Scer_YAL002W.143604	1	0	0	0	0	1	0	0	0	1	YAL002W	Scer
Scer_chrI:129035-129038	Scer_YAL014C.129038	1	0	0	0	1	0	0	0	0	1	YAL014C	Scer
Scer_chrI:120194-120197	Scer_YAL017W.120194	0	1	0	1	1	0	0	0	0	1	YAL017W	Scer
Scer_chrI:92343-92346	Scer_YAL029C.92346	0	1	1	0	1	0	0	1	0	1	YAL029C	Scer
Scer_chrI:45830-45833	Scer_YAL053W.45830	0	1	0	1	1	0	0	1	0	1	YAL053W	Scer
Scer_chrI:22910-22913	Scer_YAL063C-A.22913	1	0	0	0	1	0	0	0	0	1	YAL063C-A	Scer
Scer_chrI:11428-11431	Scer_YAL064W-B.11428	1	0	0	0	1	0	0	0	0	1	YAL064W-B	Scer
Scer_chrI:169336-169339	Scer_YAR015W.169336	0	1	1	0	0	1	0	1	0	1	YAR015W	Scer
Scer_chrI:180091-180094	Scer_YAR023C.180094	1	0	0	0	1	0	0	0	1	0	YAR023C	Scer
Scer_chrI:221850-221853	Scer_YAR068W.221850	0	1	1	0	1	0	0	1	1	0	YAR068W	Scer
Scer_chrII:236358-236361	Scer_YBL002W.236358	1	0	0	0	1	0	0	0	1	0	YBL002W	Scer
Scer_chrII:236450-236453	Scer_YBL002W.236450	0	1	1	0	1	0	0	0	1	0	YBL002W	Scer
Scer_chrII:227591-227594	Scer_YBL004W.227591	0	1	0	1	1	0	0	0	0	1	YBL004W	Scer
Scer_chrII:207171-207174	Scer_YBL009W.207171	1	0	0	0	1	0	0	0	0	1	YBL009W	Scer
Scer_chrII:191603-191606	Scer_YBL017C.191606	0	1	0	1	1	0	0	0	0	1	YBL017C	Scer
Scer_chrII:164846-164849	Scer_YBL029C-A.164849	1	0	0	0	1	0	0	0	1	0	YBL029C-A	Scer
Scer_chrII:164114-164117	Scer_YBL030C.164117	0	1	1	0	1	0	1	0	0	1	YBL030C	Scer
Scer_chrII:143188-143191	Scer_YBL039W-B.143188	1	0	0	0	1	0	0	0	0	1	YBL039W-B	Scer
Scer_chrII:135549-135552	Scer_YBL045C.135552	0	1	0	1	0	1	1	1	0	1	YBL045C	Scer
Scer_chrII:132130-132133	Scer_YBL047C.132133	0	1	1	0	1	0	0	0	0	1	YBL047C	Scer
Scer_chrII:121958-121961	Scer_YBL052C.121961	0	1	1	0	1	0	0	0	0	1	YBL052C	Scer
Scer_chrII:122075-122078	Scer_YBL052C.122078	0	1	0	1	1	0	0	0	0	1	YBL052C	Scer
Scer_chrII:107881-107884	Scer_YBL060W.107881	1	0	0	0	1	0	0	0	0	1	YBL060W	Scer
Scer_chrII:101187-101190	Scer_YBL064C.101190	1	0	0	0	1	0	0	0	0	1	YBL064C	Scer
Scer_chrII:92348-92351	Scer_YBL068W.92348	1	0	0	0	1	0	0	0	1	0	YBL068W	Scer
Scer_chrII:71753-71756	Scer_YBL081W.71753	0	1	1	0	1	0	0	0	0	1	YBL081W	Scer
Scer_chrII:63803-63806	Scer_YBL085W.63803	0	1	1	0	1	0	0	0	0	1	YBL085W	Scer
Scer_chrII:36818-36821	Scer_YBL099W.36818	0	1	1	0	0	1	1	1	0	1	YBL099W	Scer
Scer_chrII:36980-36983	Scer_YBL099W.36980	0	1	1	0	0	1	1	0	0	1	YBL099W	Scer
Scer_chrII:5330-5333	Scer_YBL111C.5333	0	1	0	1	1	0	0	0	0	1	YBL111C	Scer
Scer_chrII:254412-254415	Scer_YBR008C.254415	1	0	0	0	1	0	0	0	1	0	YBR008C	Scer
Scer_chrII:254853-254856	Scer_YBR008C.254856	1	0	0	0	0	1	0	0	1	0	YBR008C	Scer
Scer_chrII:296055-296058	Scer_YBR028C.296058	1	0	0	0	1	0	0	0	0	1	YBR028C	Scer
Scer_chrII:298135-298138	Scer_YBR030W.298135	1	0	0	0	1	0	0	0	1	0	YBR030W	Scer
Scer_chrII:324008-324011	Scer_YBR043C.324011	0	1	0	1	0	1	1	1	0	1	YBR043C	Scer
Scer_chrII:393071-393074	Scer_YBR078W.393071	0	1	0	1	1	0	1	0	0	1	YBR078W	Scer
Scer_chrII:415886-415889	Scer_YBR085W.415886	1	0	0	0	1	0	0	0	1	0	YBR085W	Scer
Scer_chrII:423100-423103	Scer_YBR086C.423103	1	0	0	0	0	1	1	0	0	1	YBR086C	Scer
Scer_chrII:431174-431177	Scer_YBR093C.431177	1	0	0	0	1	0	0	0	1	0	YBR093C	Scer
Scer_chrII:483393-483396	Scer_YBR121C.483396	0	1	1	0	1	0	1	0	0	1	YBR121C	Scer
Scer_chrII:483434-483437	Scer_YBR121C.483437	0	1	0	1	0	1	0	1	1	0	YBR121C	Scer
Scer_chrII:501577-501580	Scer_YBR132C.501580	0	1	0	1	1	0	0	0	0	1	YBR132C	Scer
Scer_chrII:526867-526870	Scer_YBR140C.526870	0	1	1	0	1	0	0	0	0	1	YBR140C	Scer
Scer_chrII:533697-533700	Scer_YBR145W.533697	1	0	0	0	1	0	0	0	1	0	YBR145W	Scer
Scer_chrII:549044-549047	Scer_YBR154C.549047	0	1	0	1	0	1	1	1	0	1	YBR154C	Scer
Scer_chrII:549079-549082	Scer_YBR154C.549082	0	1	1	0	1	0	1	0	0	1	YBR154C	Scer
Scer_chrII:556332-556335	Scer_YBR158W.556332	1	0	0	0	0	1	1	1	0	1	YBR158W	Scer
Scer_chrII:560002-560005	Scer_YBR160W.560002	0	1	1	0	1	0	0	0	0	1	YBR160W	Scer
Scer_chrII:564778-564781	Scer_YBR162C.564781	0	1	1	0	1	0	0	0	1	0	YBR162C	Scer
Scer_chrII:565097-565100	Scer_YBR162W-A.565097	1	0	0	0	1	0	0	0	1	0	YBR162W-A	Scer
Scer_chrII:572066-572069	Scer_YBR168W.572066	1	0	0	0	0	1	0	0	1	0	YBR168W	Scer
Scer_chrII:572266-572269	Scer_YBR168W.572266	1	0	0	0	0	1	1	0	0	1	YBR168W	Scer
Scer_chrII:594887-594890	Scer_YBR182C.594890	0	1	0	1	1	0	0	0	0	1	YBR182C	Scer
Scer_chrII:602519-602522	Scer_YBR187W.602519	1	0	0	0	0	1	1	1	1	0	YBR187W	Scer
Scer_chrII:613917-613920	Scer_YBR196C.613920	0	1	0	1	1	0	1	0	1	0	YBR196C	Scer
Scer_chrII:618889-618892	Scer_YBR199W.618889	0	1	0	1	1	0	0	0	0	1	YBR199W	Scer
Scer_chrII:642428-642431	Scer_YBR208C.642431	1	0	0	0	1	0	0	0	0	1	YBR208C	Scer
Scer_chrII:642517-642520	Scer_YBR208C.642520	1	0	0	0	1	0	0	0	0	1	YBR208C	Scer
Scer_chrII:645419-645422	Scer_YBR210W.645419	1	0	0	0	1	0	0	0	1	0	YBR210W	Scer
Scer_chrII:647726-647729	Scer_YBR212W.647726	0	1	0	1	1	0	0	1	0	1	YBR212W	Scer
Scer_chrII:647860-647863	Scer_YBR212W.647860	0	1	0	1	1	0	0	0	0	1	YBR212W	Scer
Scer_chrII:650326-650329	Scer_YBR213W.650326	1	0	0	0	1	0	0	0	0	1	YBR213W	Scer
Scer_chrII:666270-666273	Scer_YBR221C.666273	0	1	1	0	1	0	0	0	0	1	YBR221C	Scer
Scer_chrII:666318-666321	Scer_YBR221C.666321	0	1	0	1	1	0	0	0	0	1	YBR221C	Scer
Scer_chrII:704493-704496	Scer_YBR242W.704493	1	0	0	0	0	1	1	0	1	0	YBR242W	Scer
Scer_chrII:704563-704566	Scer_YBR242W.704563	1	0	0	0	1	0	1	0	0	1	YBR242W	Scer
Scer_chrII:723232-723235	Scer_YBR253W.723232	1	0	0	0	1	0	0	0	0	1	YBR253W	Scer
Scer_chrII:744592-744595	Scer_YBR270C.744595	1	0	0	0	0	1	0	1	0	1	YBR270C	Scer
Scer_chrII:770476-770479	Scer_YBR283C.770479	0	1	1	0	1	0	0	1	0	1	YBR283C	Scer
Scer_chrII:784618-784621	Scer_YBR291C.784621	1	0	0	0	1	0	0	0	0	1	YBR291C	Scer
Scer_chrII:792800-792803	Scer_YBR295W.792800	1	0	0	0	1	0	0	0	0	1	YBR295W	Scer
Scer_chrII:809644-809647	Scer_YBR300C.809647	1	0	0	0	1	0	0	0	0	1	YBR300C	Scer
Scer_chrII:809674-809677	Scer_YBR300C.809677	1	0	0	0	1	0	0	0	0	1	YBR300C	Scer
Scer_chrIII:95809-95812	Scer_YCL016C.95812	1	0	0	0	1	0	0	0	1	0	YCL016C	Scer
Scer_chrIII:120332-120335	Scer_YCR004C.120335	0	1	0	1	1	0	0	0	0	1	YCR004C	Scer
Scer_chrIII:122354-122357	Scer_YCR005C.122357	0	1	1	0	1	0	0	0	0	1	YCR005C	Scer
Scer_chrIII:128265-128268	Scer_YCR008W.128265	0	1	1	0	1	0	0	0	0	1	YCR008W	Scer
Scer_chrIII:136908-136911	Scer_YCR011C.136911	0	1	1	0	0	1	0	1	0	1	YCR011C	Scer
Scer_chrIII:152772-152775	Scer_YCR019W.152772	1	0	0	0	1	0	0	0	0	1	YCR019W	Scer
Scer_chrIII:157149-157152	Scer_YCR021C.157152	0	1	1	0	1	0	0	0	0	1	YCR021C	Scer
Scer_chrIII:160426-160429	Scer_YCR023C.160429	1	0	0	0	1	0	0	0	0	1	YCR023C	Scer
Scer_chrIII:163128-163131	Scer_YCR024C-A.163131	0	1	1	0	0	1	1	0	0	1	YCR024C-A	Scer
Scer_chrIII:163205-163208	Scer_YCR024C-A.163208	0	1	1	0	1	0	0	0	0	1	YCR024C-A	Scer
Scer_chrIII:168096-168099	Scer_YCR027C.168099	0	1	1	0	0	1	1	1	0	1	YCR027C	Scer
Scer_chrIII:172522-172525	Scer_YCR028C.172525	1	0	0	0	1	0	0	0	1	0	YCR028C	Scer
Scer_chrIII:176454-176457	Scer_YCR030C.176457	0	1	1	0	1	0	0	0	0	1	YCR030C	Scer
Scer_chrIII:176853-176856	Scer_YCR030C.176856	1	0	0	0	1	0	0	0	0	1	YCR030C	Scer
Scer_chrIII:177114-177117	Scer_YCR030C.177117	1	0	0	0	1	0	0	0	1	0	YCR030C	Scer
Scer_chrIII:193250-193253	Scer_YCR036W.193250	1	0	0	0	1	0	0	0	1	0	YCR036W	Scer
Scer_chrIII:208217-208220	Scer_YCR045W-A.208217	0	1	1	0	0	1	1	1	0	1	YCR045W-A	Scer
Scer_chrIII:208297-208300	Scer_YCR045W-A.208297	1	0	0	0	0	1	0	1	0	1	YCR045W-A	Scer
Scer_chrIII:237154-237157	Scer_YCR068W.237154	0	1	0	1	1	0	0	0	0	1	YCR068W	Scer
Scer_chrIII:239004-239007	Scer_YCR069W.239004	0	1	1	0	1	0	0	0	0	1	YCR069W	Scer
Scer_chrIII:262513-262516	Scer_YCR084C.262516	0	1	0	1	1	0	0	0	0	1	YCR084C	Scer
Scer_chrIII:262569-262572	Scer_YCR084C.262572	0	1	0	1	0	1	1	1	0	1	YCR084C	Scer
Scer_chrIII:289605-289608	Scer_YCR095W-A.289605	1	0	0	0	1	0	0	0	0	1	YCR095W-A	Scer
Scer_chrIII:293603-293606	Scer_YCR096C.293606	1	0	0	0	1	0	0	0	0	1	YCR096C	Scer
Scer_chrIII:305593-305596	Scer_YCR102C.305596	0	1	0	1	1	0	0	0	1	0	YCR102C	Scer
Scer_chrIV:447617-447620	Scer_YDL002C.447620	1	0	0	0	1	0	0	0	0	1	YDL002C	Scer
Scer_chrIV:439868-439871	Scer_YDL006W.439868	0	1	0	1	1	0	0	1	0	1	YDL006W	Scer
Scer_chrIV:434060-434063	Scer_YDL009C.434063	1	0	0	0	1	0	0	0	1	0	YDL009C	Scer
Scer_chrIV:427314-427317	Scer_YDL014W.427314	0	1	1	0	1	0	0	0	0	1	YDL014W	Scer
Scer_chrIV:421623-421626	Scer_YDL019C.421626	0	1	0	1	1	0	0	0	0	1	YDL019C	Scer
Scer_chrIV:421704-421707	Scer_YDL019C.421707	0	1	1	0	1	0	0	0	0	1	YDL019C	Scer
Scer_chrIV:416745-416748	Scer_YDL020C.416748	0	1	1	0	0	1	1	1	0	1	YDL020C	Scer
Scer_chrIV:416820-416823	Scer_YDL020C.416823	0	1	1	0	1	0	0	0	0	1	YDL020C	Scer
Scer_chrIV:405270-405273	Scer_YDL025W-A.405270	1	0	0	0	1	0	0	0	0	1	YDL025W-A	Scer
Scer_chrIV:403305-403308	Scer_YDL028C.403308	1	0	0	0	0	1	1	1	0	1	YDL028C	Scer
Scer_chrIV:403367-403370	Scer_YDL028C.403370	0	1	1	0	0	1	1	0	0	1	YDL028C	Scer
Scer_chrIV:369719-369722	Scer_YDL047W.369719	0	1	0	1	1	0	1	0	0	1	YDL047W	Scer
Scer_chrIV:362455-362458	Scer_YDL053C.362458	1	0	0	0	1	0	0	0	1	0	YDL053C	Scer
Scer_chrIV:330769-330772	Scer_YDL070W.330769	1	0	0	0	1	0	0	0	1	0	YDL070W	Scer
Scer_chrIV:321652-321655	Scer_YDL076C.321655	1	0	0	0	1	0	0	0	0	1	YDL076C	Scer
Scer_chrIV:310169-310172	Scer_YDL081C.310172	0	1	1	0	0	1	1	1	0	1	YDL081C	Scer
Scer_chrIV:305187-305190	Scer_YDL084W.305187	0	1	1	0	0	1	1	1	0	1	YDL084W	Scer
Scer_chrIV:239689-239692	Scer_YDL125C.239692	1	0	0	0	1	0	0	0	0	1	YDL125C	Scer
Scer_chrIV:239792-239795	Scer_YDL125C.239795	1	0	0	0	1	0	0	0	1	0	YDL125C	Scer
Scer_chrIV:229866-229869	Scer_YDL130W.229866	0	1	0	1	1	0	0	0	1	0	YDL130W	Scer
Scer_chrIV:224063-224066	Scer_YDL132W.224063	0	1	1	0	1	0	0	0	0	1	YDL132W	Scer
Scer_chrIV:224201-224204	Scer_YDL132W.224201	0	1	1	0	0	1	1	1	0	1	YDL132W	Scer
Scer_chrIV:222371-222374	Scer_YDL133W.222371	1	0	0	0	1	0	1	0	0	1	YDL133W	Scer
Scer_chrIV:220838-220841	Scer_YDL134C.220841	0	1	1	0	1	0	0	1	0	1	YDL134C	Scer
Scer_chrIV:221110-221113	Scer_YDL134C.221113	0	1	1	0	1	0	1	1	0	1	YDL134C	Scer
Scer_chrIV:221680-221683	Scer_YDL134C.221683	0	1	0	1	0	1	1	1	0	1	YDL134C	Scer
Scer_chrIV:217564-217567	Scer_YDL136W.217564	0	1	0	1	1	0	0	0	1	0	YDL136W	Scer
Scer_chrIV:213324-213327	Scer_YDL138W.213324	1	0	0	0	0	1	1	0	0	1	YDL138W	Scer
Scer_chrIV:210659-210662	Scer_YDL140C.210662	0	1	1	0	1	0	1	0	0	1	YDL140C	Scer
Scer_chrIV:203018-203021	Scer_YDL141W.203018	0	1	0	1	0	1	1	1	0	1	YDL141W	Scer
Scer_chrIV:198198-198201	Scer_YDL145C.198201	0	1	1	0	0	1	1	0	0	1	YDL145C	Scer
Scer_chrIV:198284-198287	Scer_YDL145C.198287	0	1	1	0	1	0	1	0	0	1	YDL145C	Scer
Scer_chrIV:171974-171977	Scer_YDL160C.171977	0	1	0	1	0	1	1	0	0	1	YDL160C	Scer
Scer_chrIV:172026-172029	Scer_YDL160C.172029	0	1	0	1	0	1	1	0	0	1	YDL160C	Scer
Scer_chrIV:172097-172100	Scer_YDL160C.172100	0	1	1	0	0	1	0	0	0	1	YDL160C	Scer
Scer_chrIV:172211-172214	Scer_YDL160C.172214	0	1	0	1	1	0	0	0	0	1	YDL160C	Scer
Scer_chrIV:155816-155819	Scer_YDL171C.155819	0	1	1	0	0	1	1	1	0	1	YDL171C	Scer
Scer_chrIV:141993-141996	Scer_YDL176W.141993	1	0	0	0	0	1	1	1	0	1	YDL176W	Scer
Scer_chrIV:141746-141749	Scer_YDL177C.141749	1	0	0	0	0	1	1	1	0	1	YDL177C	Scer
Scer_chrIV:121678-121681	Scer_YDL190C.121681	0	1	1	0	1	0	0	0	0	1	YDL190C	Scer
Scer_chrIV:121770-121773	Scer_YDL190C.121773	0	1	1	0	1	0	0	0	0	1	YDL190C	Scer
Scer_chrIV:107171-107174	Scer_YDL195W.107171	0	1	1	0	1	0	0	0	0	1	YDL195W	Scer
Scer_chrIV:104616-104619	Scer_YDL198C.104619	1	0	0	0	0	1	1	1	0	1	YDL198C	Scer
Scer_chrIV:90140-90143	Scer_YDL206W.90140	1	0	0	0	1	0	0	0	0	1	YDL206W	Scer
Scer_chrIV:56474-56477	Scer_YDL224C.56477	0	1	1	0	1	0	0	0	0	1	YDL224C	Scer
Scer_chrIV:36512-36515	Scer_YDL234C.36515	0	1	1	0	1	0	0	0	0	1	YDL234C	Scer
Scer_chrIV:452722-452725	Scer_YDR001C.452725	1	0	0	0	1	0	0	0	1	0	YDR001C	Scer
Scer_chrIV:458221-458224	Scer_YDR005C.458224	1	0	0	0	1	0	0	0	1	0	YDR005C	Scer
Scer_chrIV:497372-497375	Scer_YDR027C.497375	0	1	0	1	1	0	0	0	0	1	YDR027C	Scer
Scer_chrIV:500907-500910	Scer_YDR028C.500910	0	1	1	0	0	1	1	0	0	1	YDR028C	Scer
Scer_chrIV:501049-501052	Scer_YDR028C.501052	0	1	1	0	1	0	0	0	0	1	YDR028C	Scer
Scer_chrIV:508037-508040	Scer_YDR033W.508037	0	1	1	0	1	0	0	1	0	1	YDR033W	Scer
Scer_chrIV:508062-508065	Scer_YDR033W.508062	0	1	1	0	0	1	1	1	0	1	YDR033W	Scer
Scer_chrIV:508080-508083	Scer_YDR033W.508080	0	1	0	1	1	0	0	0	0	1	YDR033W	Scer
Scer_chrIV:508104-508107	Scer_YDR033W.508104	0	1	0	1	0	1	1	1	0	1	YDR033W	Scer
Scer_chrIV:512134-512137	Scer_YDR034C.512137	0	1	1	0	0	1	1	1	0	1	YDR034C	Scer
Scer_chrIV:512654-512657	Scer_YDR034C.512657	1	0	0	0	1	0	0	0	1	0	YDR034C	Scer
Scer_chrIV:525007-525010	Scer_YDR036C.525010	1	0	0	0	1	0	0	0	1	0	YDR036C	Scer
Scer_chrIV:530742-530745	Scer_YDR038C.530745	1	0	0	0	1	0	0	0	0	1	YDR038C	Scer
Scer_chrIV:534627-534630	Scer_YDR039C.534630	1	0	0	0	1	0	0	0	0	1	YDR039C	Scer
Scer_chrIV:543415-543418	Scer_YDR043C.543418	0	1	0	1	1	0	0	0	0	1	YDR043C	Scer
Scer_chrIV:543538-543541	Scer_YDR043C.543541	1	0	0	0	0	1	1	1	0	1	YDR043C	Scer
Scer_chrIV:548367-548370	Scer_YDR045C.548370	1	0	0	0	0	1	1	1	0	1	YDR045C	Scer
Scer_chrIV:550626-550629	Scer_YDR046C.550629	1	0	0	0	1	0	0	1	0	1	YDR046C	Scer
Scer_chrIV:551445-551448	Scer_YDR047W.551445	1	0	0	0	1	0	0	0	1	0	YDR047W	Scer
Scer_chrIV:551677-551680	Scer_YDR047W.551677	1	0	0	0	1	0	1	0	1	0	YDR047W	Scer
Scer_chrIV:551715-551718	Scer_YDR047W.551715	1	0	0	0	1	0	0	0	1	0	YDR047W	Scer
Scer_chrIV:560797-560800	Scer_YDR052C.560800	1	0	0	0	1	0	0	0	1	0	YDR052C	Scer
Scer_chrIV:576221-576224	Scer_YDR062W.576221	0	1	1	0	1	0	1	0	0	1	YDR062W	Scer
Scer_chrIV:576352-576355	Scer_YDR062W.576352	0	1	1	0	1	0	0	0	0	1	YDR062W	Scer
Scer_chrIV:578342-578345	Scer_YDR063W.578342	1	0	0	0	1	0	0	0	1	0	YDR063W	Scer
Scer_chrIV:578447-578450	Scer_YDR063W.578447	1	0	0	0	1	0	0	0	1	0	YDR063W	Scer
Scer_chrIV:580669-580672	Scer_YDR065W.580669	1	0	0	0	0	1	1	1	0	1	YDR065W	Scer
Scer_chrIV:589420-589423	Scer_YDR071C.589423	0	1	0	1	1	0	1	0	0	1	YDR071C	Scer
Scer_chrIV:589462-589465	Scer_YDR071C.589465	0	1	0	1	1	0	0	0	1	0	YDR071C	Scer
Scer_chrIV:591398-591401	Scer_YDR072C.591401	0	1	1	0	1	0	1	0	0	1	YDR072C	Scer
Scer_chrIV:591430-591433	Scer_YDR072C.591433	0	1	1	0	1	0	0	0	0	1	YDR072C	Scer
Scer_chrIV:592204-592207	Scer_YDR073W.592204	1	0	0	0	1	0	0	0	1	0	YDR073W	Scer
Scer_chrIV:592338-592341	Scer_YDR073W.592338	1	0	0	0	1	0	0	0	1	0	YDR073W	Scer
Scer_chrIV:593836-593839	Scer_YDR074W.593836	0	1	1	0	0	1	0	0	0	1	YDR074W	Scer
Scer_chrIV:593866-593869	Scer_YDR074W.593866	0	1	0	1	0	1	1	1	0	1	YDR074W	Scer
Scer_chrIV:600773-600776	Scer_YDR077W.600773	0	1	0	1	0	1	1	1	0	1	YDR077W	Scer
Scer_chrIV:616300-616303	Scer_YDR085C.616303	1	0	0	0	1	0	0	0	0	1	YDR085C	Scer
Scer_chrIV:617225-617228	Scer_YDR086C.617228	0	1	1	0	0	1	1	1	0	1	YDR086C	Scer
Scer_chrIV:631197-631200	Scer_YDR093W.631197	0	1	1	0	1	0	0	0	0	1	YDR093W	Scer
Scer_chrIV:657833-657836	Scer_YDR103W.657833	1	0	0	0	1	0	0	0	1	0	YDR103W	Scer
Scer_chrIV:679801-679804	Scer_YDR111C.679804	0	1	1	0	1	0	0	0	0	1	YDR111C	Scer
Scer_chrIV:694441-694444	Scer_YDR122W.694441	0	1	1	0	1	0	0	0	0	1	YDR122W	Scer
Scer_chrIV:694605-694608	Scer_YDR122W.694605	0	1	0	1	1	0	0	0	0	1	YDR122W	Scer
Scer_chrIV:694619-694622	Scer_YDR122W.694619	0	1	1	0	1	0	0	0	0	1	YDR122W	Scer
Scer_chrIV:743913-743916	Scer_YDR143C.743916	0	1	1	0	1	0	0	0	0	1	YDR143C	Scer
Scer_chrIV:751310-751313	Scer_YDR147W.751310	1	0	0	0	1	0	0	0	1	0	YDR147W	Scer
Scer_chrIV:755105-755108	Scer_YDR148C.755108	0	1	1	0	0	1	1	0	0	1	YDR148C	Scer
Scer_chrIV:768003-768006	Scer_YDR153C.768006	0	1	0	1	0	1	1	1	0	1	YDR153C	Scer
Scer_chrIV:776029-776032	Scer_YDR160W.776029	1	0	0	0	1	0	0	0	0	1	YDR160W	Scer
Scer_chrIV:802393-802396	Scer_YDR170C.802396	0	1	1	0	1	0	0	0	0	1	YDR170C	Scer
Scer_chrIV:817891-817894	Scer_YDR178W.817891	0	1	1	0	1	0	0	0	0	1	YDR178W	Scer
Scer_chrIV:835508-835511	Scer_YDR186C.835511	0	1	1	0	1	0	0	0	0	1	YDR186C	Scer
Scer_chrIV:861806-861809	Scer_YDR206W.861806	1	0	0	0	1	0	1	1	0	1	YDR206W	Scer
Scer_chrIV:862021-862024	Scer_YDR206W.862021	0	1	1	0	0	1	1	0	0	1	YDR206W	Scer
Scer_chrIV:906917-906920	Scer_YDR219C.906920	0	1	1	0	1	0	1	0	0	1	YDR219C	Scer
Scer_chrIV:915479-915482	Scer_YDR225W.915479	0	1	0	1	1	0	0	1	0	1	YDR225W	Scer
Scer_chrIV:924434-924437	Scer_YDR228C.924437	1	0	0	0	1	0	0	0	1	0	YDR228C	Scer
Scer_chrIV:927361-927364	Scer_YDR232W.927361	0	1	1	0	0	1	1	1	0	1	YDR232W	Scer
Scer_chrIV:936585-936588	Scer_YDR237W.936585	0	1	1	0	0	1	1	1	0	1	YDR237W	Scer
Scer_chrIV:946736-946739	Scer_YDR242W.946736	1	0	0	0	1	0	0	0	0	1	YDR242W	Scer
Scer_chrIV:960329-960332	Scer_YDR251W.960329	0	1	1	0	1	0	0	0	0	1	YDR251W	Scer
Scer_chrIV:960562-960565	Scer_YDR251W.960562	0	1	1	0	1	0	0	0	0	1	YDR251W	Scer
Scer_chrIV:998637-998640	Scer_YDR265W.998637	1	0	0	0	1	0	0	0	1	0	YDR265W	Scer
Scer_chrIV:1002077-1002080	Scer_YDR266C.1002080	0	1	1	0	0	1	1	1	0	1	YDR266C	Scer
Scer_chrIV:1011638-1011641	Scer_YDR275W.1011638	1	0	0	0	1	0	0	0	1	0	YDR275W	Scer
Scer_chrIV:1013670-1013673	Scer_YDR276C.1013673	0	1	1	0	0	1	1	1	0	1	YDR276C	Scer
Scer_chrIV:1020714-1020717	Scer_YDR280W.1020714	0	1	1	0	0	1	1	0	0	1	YDR280W	Scer
Scer_chrIV:1031462-1031465	Scer_YDR284C.1031465	0	1	1	0	1	0	1	0	0	1	YDR284C	Scer
Scer_chrIV:1031594-1031597	Scer_YDR284C.1031597	0	1	0	1	1	0	1	0	0	1	YDR284C	Scer
Scer_chrIV:1049418-1049421	Scer_YDR293C.1049421	0	1	1	0	0	1	0	1	0	1	YDR293C	Scer
Scer_chrIV:1058931-1058934	Scer_YDR298C.1058934	0	1	1	0	1	0	0	0	0	1	YDR298C	Scer
Scer_chrIV:1071462-1071465	Scer_YDR303C.1071465	0	1	0	1	1	0	1	0	0	1	YDR303C	Scer
Scer_chrIV:1124981-1124984	Scer_YDR326C.1124984	0	1	1	0	1	0	0	1	0	1	YDR326C	Scer
Scer_chrIV:1135879-1135882	Scer_YDR334W.1135879	1	0	0	0	1	0	1	0	0	1	YDR334W	Scer
Scer_chrIV:1168709-1168712	Scer_YDR346C.1168712	0	1	1	0	0	1	0	1	0	1	YDR346C	Scer
Scer_chrIV:1171847-1171850	Scer_YDR348C.1171850	0	1	1	0	1	0	0	0	0	1	YDR348C	Scer
Scer_chrIV:1171894-1171897	Scer_YDR348C.1171897	0	1	1	0	1	0	0	0	0	1	YDR348C	Scer
Scer_chrIV:1174698-1174701	Scer_YDR349C.1174701	0	1	0	1	1	0	0	0	1	0	YDR349C	Scer
Scer_chrIV:1178518-1178521	Scer_YDR351W.1178518	0	1	1	0	1	0	0	0	0	1	YDR351W	Scer
Scer_chrIV:1181754-1181757	Scer_YDR352W.1181754	0	1	1	0	0	1	1	1	0	1	YDR352W	Scer
Scer_chrIV:1189630-1189633	Scer_YDR357C.1189633	1	0	0	0	1	0	0	0	0	1	YDR357C	Scer
Scer_chrIV:1198792-1198795	Scer_YDR362C.1198795	1	0	0	0	1	0	0	0	0	1	YDR362C	Scer
Scer_chrIV:1212854-1212857	Scer_YDR366C.1212857	1	0	0	0	1	0	0	0	0	1	YDR366C	Scer
Scer_chrIV:1222208-1222211	Scer_YDR372C.1222211	0	1	1	0	0	1	1	0	0	1	YDR372C	Scer
Scer_chrIV:1228549-1228552	Scer_YDR377W.1228549	0	1	0	1	1	0	0	0	0	1	YDR377W	Scer
Scer_chrIV:1233561-1233564	Scer_YDR379C-A.1233564	1	0	0	0	1	0	0	0	1	0	YDR379C-A	Scer
Scer_chrIV:1233648-1233651	Scer_YDR379C-A.1233651	1	0	0	0	1	0	0	0	1	0	YDR379C-A	Scer
Scer_chrIV:1234145-1234148	Scer_YDR380W.1234145	0	1	1	0	1	0	0	1	0	1	YDR380W	Scer
Scer_chrIV:1234194-1234197	Scer_YDR380W.1234194	0	1	0	1	0	1	0	1	0	1	YDR380W	Scer
Scer_chrIV:1236510-1236513	Scer_YDR381W.1236510	0	1	1	0	1	0	0	0	0	1	YDR381W	Scer
Scer_chrIV:1236540-1236543	Scer_YDR381W.1236540	0	1	0	1	0	1	1	1	0	1	YDR381W	Scer
Scer_chrIV:1239443-1239446	Scer_YDR382W.1239443	0	1	0	1	0	1	1	1	0	1	YDR382W	Scer
Scer_chrIV:1242145-1242148	Scer_YDR384C.1242148	1	0	0	0	1	0	0	0	1	0	YDR384C	Scer
Scer_chrIV:1249897-1249900	Scer_YDR387C.1249900	1	0	0	0	0	1	0	0	0	1	YDR387C	Scer
Scer_chrIV:1252305-1252308	Scer_YDR389W.1252305	0	1	1	0	1	0	1	0	0	1	YDR389W	Scer
Scer_chrIV:1252404-1252407	Scer_YDR389W.1252404	0	1	0	1	1	0	0	0	0	1	YDR389W	Scer
Scer_chrIV:1263282-1263285	Scer_YDR395W.1263282	0	1	1	0	0	1	1	1	0	1	YDR395W	Scer
Scer_chrIV:1266915-1266918	Scer_YDR397C.1266918	0	1	1	0	1	0	0	0	0	1	YDR397C	Scer
Scer_chrIV:1288919-1288922	Scer_YDR408C.1288922	1	0	0	0	1	0	0	0	1	0	YDR408C	Scer
Scer_chrIV:1296780-1296783	Scer_YDR414C.1296783	0	1	0	1	1	0	0	0	0	1	YDR414C	Scer
Scer_chrIV:1296826-1296829	Scer_YDR414C.1296829	1	0	0	0	1	0	0	0	0	1	YDR414C	Scer
Scer_chrIV:1345090-1345093	Scer_YDR441C.1345093	1	0	0	0	0	1	0	0	0	1	YDR441C	Scer
Scer_chrIV:1362821-1362824	Scer_YDR452W.1362821	0	1	1	0	1	0	0	0	0	1	YDR452W	Scer
Scer_chrIV:1369729-1369732	Scer_YDR457W.1369729	0	1	1	0	1	0	0	0	0	1	YDR457W	Scer
Scer_chrIV:1369769-1369772	Scer_YDR457W.1369769	0	1	1	0	1	0	0	0	0	1	YDR457W	Scer
Scer_chrIV:1398727-1398730	Scer_YDR468C.1398730	0	1	0	1	1	0	0	0	0	1	YDR468C	Scer
Scer_chrIV:1403212-1403215	Scer_YDR472W.1403212	1	0	0	0	1	0	0	0	0	1	YDR472W	Scer
Scer_chrIV:1412254-1412257	Scer_YDR477W.1412254	0	1	0	1	1	0	0	0	0	1	YDR477W	Scer
Scer_chrIV:1421099-1421102	Scer_YDR483W.1421099	1	0	0	0	1	0	0	0	1	0	YDR483W	Scer
Scer_chrIV:1434823-1434826	Scer_YDR492W.1434823	0	1	0	1	1	0	0	0	0	1	YDR492W	Scer
Scer_chrIV:1459311-1459314	Scer_YDR505C.1459314	0	1	1	0	1	0	0	0	0	1	YDR505C	Scer
Scer_chrIV:1465830-1465833	Scer_YDR507C.1465833	0	1	1	0	1	0	1	0	0	1	YDR507C	Scer
Scer_chrIV:1497841-1497844	Scer_YDR530C.1497844	1	0	0	0	1	0	0	0	1	0	YDR530C	Scer
Scer_chrIV:1498214-1498217	Scer_YDR531W.1498214	1	0	0	0	1	0	0	0	0	1	YDR531W	Scer
Scer_chrIV:1526006-1526009	Scer_YDR545W.1526006	0	1	0	1	1	0	0	0	0	1	YDR545W	Scer
Scer_chrV:144294-144297	Scer_YEL006W.144294	1	0	0	0	1	0	0	0	1	0	YEL006W	Scer
Scer_chrV:139911-139914	Scer_YEL009C.139914	1	0	0	0	0	1	1	1	0	1	YEL009C	Scer
Scer_chrV:139936-139939	Scer_YEL009C.139939	1	0	0	0	0	1	1	1	0	1	YEL009C	Scer
Scer_chrV:140053-140056	Scer_YEL009C.140056	1	0	0	0	0	1	0	0	0	1	YEL009C	Scer
Scer_chrV:140121-140124	Scer_YEL009C.140124	1	0	0	0	0	1	1	1	0	1	YEL009C	Scer
Scer_chrV:140191-140194	Scer_YEL009C.140194	0	1	0	1	0	1	0	0	0	1	YEL009C	Scer
Scer_chrV:140276-140279	Scer_YEL009C.140279	0	1	0	1	1	0	0	0	0	1	YEL009C	Scer
Scer_chrV:128688-128691	Scer_YEL013W.128688	0	1	1	0	0	1	1	1	0	1	YEL013W	Scer
Scer_chrV:128787-128790	Scer_YEL013W.128787	0	1	0	1	0	1	1	1	0	1	YEL013W	Scer
Scer_chrV:117683-117686	Scer_YEL020C-B.117686	0	1	0	1	1	0	0	0	0	1	YEL020C-B	Scer
Scer_chrV:117723-117726	Scer_YEL020C-B.117726	0	1	0	1	0	1	1	1	0	1	YEL020C-B	Scer
Scer_chrV:117791-117794	Scer_YEL020C-B.117794	1	0	0	0	1	0	0	0	0	1	YEL020C-B	Scer
Scer_chrV:117949-117952	Scer_YEL020C-B.117952	0	1	0	1	1	0	1	1	0	1	YEL020C-B	Scer
Scer_chrV:118107-118110	Scer_YEL020C-B.118110	0	1	1	0	0	1	1	0	0	1	YEL020C-B	Scer
Scer_chrV:111365-111368	Scer_YEL022W.111365	0	1	0	1	1	0	0	0	0	1	YEL022W	Scer
Scer_chrV:101901-101904	Scer_YEL026W.101901	0	1	1	0	0	1	1	1	0	1	YEL026W	Scer
Scer_chrV:98162-98165	Scer_YEL028W.98162	1	0	0	0	1	0	0	0	0	1	YEL028W	Scer
Scer_chrV:94220-94223	Scer_YEL030W.94220	1	0	0	0	1	0	0	0	0	1	YEL030W	Scer
Scer_chrV:85656-85659	Scer_YEL034W.85656	0	1	0	1	0	1	1	1	0	1	YEL034W	Scer
Scer_chrV:84569-84572	Scer_YEL036C.84572	1	0	0	0	0	1	1	1	0	1	YEL036C	Scer
Scer_chrV:82662-82665	Scer_YEL037C.82665	0	1	0	1	1	0	1	1	0	1	YEL037C	Scer
Scer_chrV:13696-13699	Scer_YEL072W.13696	1	0	0	0	1	0	0	0	0	1	YEL072W	Scer
Scer_chrV:232400-232403	Scer_YER041W.232400	1	0	0	0	1	0	0	0	0	1	YER041W	Scer
Scer_chrV:259733-259736	Scer_YER053C.259736	1	0	0	0	1	0	0	0	0	1	YER053C	Scer
Scer_chrV:265838-265841	Scer_YER055C.265841	0	1	1	0	1	0	0	0	1	0	YER055C	Scer
Scer_chrV:271158-271161	Scer_YER057C.271161	0	1	0	1	0	1	0	1	0	1	YER057C	Scer
Scer_chrV:289487-289490	Scer_YER066W.289487	1	0	0	0	1	0	0	0	1	0	YER066W	Scer
Scer_chrV:318358-318361	Scer_YER078C.318361	0	1	0	1	1	0	0	0	0	1	YER078C	Scer
Scer_chrV:322234-322237	Scer_YER081W.322234	1	0	0	0	1	0	1	0	0	1	YER081W	Scer
Scer_chrV:322342-322345	Scer_YER081W.322342	1	0	0	0	1	0	0	0	0	1	YER081W	Scer
Scer_chrV:332563-332566	Scer_YER087C-A.332566	1	0	0	0	1	0	0	0	1	0	YER087C-A	Scer
Scer_chrV:337379-337382	Scer_YER089C.337382	0	1	0	1	0	1	1	1	0	1	YER089C	Scer
Scer_chrV:337580-337583	Scer_YER089C.337583	0	1	1	0	0	1	1	1	0	1	YER089C	Scer
Scer_chrV:337918-337921	Scer_YER090W.337918	0	1	0	1	0	1	0	0	0	1	YER090W	Scer
Scer_chrV:342219-342222	Scer_YER091C.342222	0	1	1	0	0	1	0	0	0	1	YER091C	Scer
Scer_chrV:349373-349376	Scer_YER094C.349376	0	1	0	1	1	0	0	0	0	1	YER094C	Scer
Scer_chrV:349386-349389	Scer_YER094C.349389	0	1	1	0	0	1	1	1	0	1	YER094C	Scer
Scer_chrV:359535-359538	Scer_YER100W.359535	0	1	1	0	1	0	0	0	0	1	YER100W	Scer
Scer_chrV:364445-364448	Scer_YER103W.364445	1	0	0	0	1	0	0	0	0	1	YER103W	Scer
Scer_chrV:374590-374593	Scer_YER107C.374593	0	1	0	1	1	0	1	0	0	1	YER107C	Scer
Scer_chrV:374621-374624	Scer_YER107C.374624	0	1	1	0	1	0	0	0	0	1	YER107C	Scer
Scer_chrV:382140-382143	Scer_YER110C.382143	0	1	0	1	1	0	0	0	0	1	YER110C	Scer
Scer_chrV:393867-393870	Scer_YER114C.393870	0	1	1	0	1	0	0	0	0	1	YER114C	Scer
Scer_chrV:395071-395074	Scer_YER115C.395074	1	0	0	0	1	0	0	0	0	1	YER115C	Scer
Scer_chrV:399089-399092	Scer_YER118C.399092	0	1	0	1	1	0	0	0	0	1	YER118C	Scer
Scer_chrV:404718-404721	Scer_YER123W.404718	0	1	0	1	1	0	1	0	0	1	YER123W	Scer
Scer_chrV:409764-409767	Scer_YER125W.409764	0	1	1	0	1	0	0	0	0	1	YER125W	Scer
Scer_chrV:410027-410030	Scer_YER125W.410027	0	1	0	1	1	0	1	0	0	1	YER125W	Scer
Scer_chrV:410132-410135	Scer_YER125W.410132	0	1	1	0	1	0	0	0	0	1	YER125W	Scer
Scer_chrV:417164-417167	Scer_YER129W.417164	1	0	0	0	0	1	0	0	0	1	YER129W	Scer
Scer_chrV:430627-430630	Scer_YER132C.430630	0	1	1	0	1	0	0	0	0	1	YER132C	Scer
Scer_chrV:451275-451278	Scer_YER139C.451278	0	1	1	0	1	0	0	0	0	1	YER139C	Scer
Scer_chrV:465139-465142	Scer_YER148W.465139	0	1	0	1	0	1	0	0	0	1	YER148W	Scer
Scer_chrV:465207-465210	Scer_YER148W.465207	0	1	0	1	1	0	1	0	0	1	YER148W	Scer
Scer_chrV:492011-492014	Scer_YER159C.492014	0	1	0	1	1	0	0	0	0	1	YER159C	Scer
Scer_chrV:492117-492120	Scer_YER159C.492120	1	0	0	0	0	1	0	0	0	1	YER159C	Scer
Scer_chrV:562696-562699	Scer_YER186C.562699	1	0	0	0	1	0	0	0	0	1	YER186C	Scer
Scer_chrVI:130284-130287	Scer_YFL005W.130284	0	1	0	1	1	0	0	1	0	1	YFL005W	Scer
Scer_chrVI:116081-116084	Scer_YFL009W.116081	0	1	1	0	0	1	1	1	0	1	YFL009W	Scer
Scer_chrVI:58710-58713	Scer_YFL036W.58710	0	1	1	0	1	0	0	0	0	1	YFL036W	Scer
Scer_chrVI:56014-56017	Scer_YFL038C.56017	0	1	1	0	1	0	0	1	0	1	YFL038C	Scer
Scer_chrVI:54778-54781	Scer_YFL039C.54781	0	1	0	1	1	0	1	0	0	1	YFL039C	Scer
Scer_chrVI:35943-35946	Scer_YFL050C.35946	1	0	0	0	1	0	0	0	0	1	YFL050C	Scer
Scer_chrVI:182932-182935	Scer_YFR017C.182935	1	0	0	0	1	0	0	0	1	0	YFR017C	Scer
Scer_chrVI:192498-192501	Scer_YFR020W.192498	1	0	0	0	1	0	0	0	1	0	YFR020W	Scer
Scer_chrVI:207406-207409	Scer_YFR027W.207406	1	0	0	0	1	0	0	0	0	1	YFR027W	Scer
Scer_chrVI:224813-224816	Scer_YFR033C.224816	0	1	0	1	0	1	1	1	0	1	YFR033C	Scer
Scer_chrVI:226467-226470	Scer_YFR036W.226467	0	1	0	1	1	0	0	0	0	1	YFR036W	Scer
Scer_chrVI:226492-226495	Scer_YFR036W.226492	0	1	0	1	1	0	0	0	0	1	YFR036W	Scer
Scer_chrVI:248431-248434	Scer_YFR049W.248431	0	1	0	1	0	1	1	1	0	1	YFR049W	Scer
Scer_chrVI:255068-255071	Scer_YFR053C.255071	0	1	0	1	1	0	0	0	0	1	YFR053C	Scer
Scer_chrVII:496596-496599	Scer_YGL001C.496599	1	0	0	0	1	0	0	0	1	0	YGL001C	Scer
Scer_chrVII:485776-485779	Scer_YGL006W.485776	1	0	0	0	0	1	0	0	0	1	YGL006W	Scer
Scer_chrVII:485876-485879	Scer_YGL006W.485876	0	1	0	1	0	1	1	1	0	1	YGL006W	Scer
Scer_chrVII:482713-482716	Scer_YGL008C.482716	0	1	1	0	1	0	0	0	0	1	YGL008C	Scer
Scer_chrVII:442934-442937	Scer_YGL028C.442937	0	1	1	0	1	0	1	0	0	1	YGL028C	Scer
Scer_chrVII:443360-443363	Scer_YGL028C.443363	1	0	0	0	0	1	1	0	1	0	YGL028C	Scer
Scer_chrVII:417059-417062	Scer_YGL044C.417062	0	1	1	0	0	1	1	1	0	1	YGL044C	Scer
Scer_chrVII:417101-417104	Scer_YGL044C.417104	0	1	0	1	1	0	0	0	0	1	YGL044C	Scer
Scer_chrVII:383588-383591	Scer_YGL063W.383588	1	0	0	0	1	0	0	0	0	1	YGL063W	Scer
Scer_chrVII:371929-371932	Scer_YGL071W.371929	1	0	0	0	1	0	0	1	0	1	YGL071W	Scer
Scer_chrVII:343295-343298	Scer_YGL090W.343295	1	0	0	0	0	1	0	1	0	1	YGL090W	Scer
Scer_chrVII:324626-324629	Scer_YGL096W.324626	1	0	0	0	1	0	0	0	1	0	YGL096W	Scer
Scer_chrVII:321761-321764	Scer_YGL097W.321761	0	1	1	0	1	0	0	0	0	1	YGL097W	Scer
Scer_chrVII:311946-311949	Scer_YGL101W.311946	1	0	0	0	1	0	0	0	1	0	YGL101W	Scer
Scer_chrVII:291955-291958	Scer_YGL115W.291955	0	1	1	0	1	0	0	0	0	1	YGL115W	Scer
Scer_chrVII:277565-277568	Scer_YGL123W.277565	0	1	0	1	0	1	1	1	0	1	YGL123W	Scer
Scer_chrVII:257644-257647	Scer_YGL133W.257644	0	1	1	0	1	0	0	0	0	1	YGL133W	Scer
Scer_chrVII:255638-255641	Scer_YGL134W.255638	1	0	0	0	0	1	1	1	0	1	YGL134W	Scer
Scer_chrVII:254614-254617	Scer_YGL135W.254614	0	1	1	0	0	1	1	1	0	1	YGL135W	Scer
Scer_chrVII:253888-253891	Scer_YGL136C.253891	1	0	0	0	1	0	0	0	0	1	YGL136C	Scer
Scer_chrVII:253997-254000	Scer_YGL136C.254000	1	0	0	0	1	0	0	0	1	0	YGL136C	Scer
Scer_chrVII:254127-254130	Scer_YGL136C.254130	1	0	0	0	1	0	0	0	1	0	YGL136C	Scer
Scer_chrVII:190547-190550	Scer_YGL167C.190550	0	1	0	1	0	1	1	0	0	1	YGL167C	Scer
Scer_chrVII:186021-186024	Scer_YGL169W.186021	1	0	0	0	0	1	0	1	0	1	YGL169W	Scer
Scer_chrVII:147428-147431	Scer_YGL190C.147431	0	1	0	1	1	0	1	0	0	1	YGL190C	Scer
Scer_chrVII:147482-147485	Scer_YGL190C.147485	0	1	0	1	1	0	0	0	0	1	YGL190C	Scer
Scer_chrVII:144736-144739	Scer_YGL191W.144736	1	0	0	0	1	0	0	0	1	0	YGL191W	Scer
Scer_chrVII:124589-124592	Scer_YGL197W.124589	1	0	0	0	1	0	0	0	0	1	YGL197W	Scer
Scer_chrVII:116018-116021	Scer_YGL202W.116018	0	1	1	0	1	0	1	1	0	1	YGL202W	Scer
Scer_chrVII:107559-107562	Scer_YGL206C.107562	0	1	1	0	0	1	1	1	0	1	YGL206C	Scer
Scer_chrVII:38844-38847	Scer_YGL246C.38847	1	0	0	0	1	0	0	0	1	0	YGL246C	Scer
Scer_chrVII:14676-14679	Scer_YGL256W.14676	0	1	0	1	1	0	0	0	1	0	YGL256W	Scer
Scer_chrVII:14354-14357	Scer_YGL257C.14357	1	0	0	0	1	0	0	0	1	0	YGL257C	Scer
Scer_chrVII:10470-10473	Scer_YGL258W.10470	1	0	0	0	1	0	0	0	0	1	YGL258W	Scer
Scer_chrVII:516702-516705	Scer_YGR014W.516702	0	1	1	0	1	0	0	0	0	1	YGR014W	Scer
Scer_chrVII:558887-558890	Scer_YGR036C.558890	0	1	1	0	1	0	0	0	0	1	YGR036C	Scer
Scer_chrVII:560603-560606	Scer_YGR038W.560603	0	1	1	0	1	0	1	1	0	1	YGR038W	Scer
Scer_chrVII:593195-593198	Scer_YGR052W.593195	1	0	0	0	1	0	0	0	0	1	YGR052W	Scer
Scer_chrVII:593397-593400	Scer_YGR052W.593397	1	0	0	0	1	0	0	0	0	1	YGR052W	Scer
Scer_chrVII:596638-596641	Scer_YGR054W.596638	0	1	0	1	1	0	0	0	0	1	YGR054W	Scer
Scer_chrVII:605523-605526	Scer_YGR057C.605526	1	0	0	0	0	1	1	1	0	1	YGR057C	Scer
Scer_chrVII:619965-619968	Scer_YGR065C.619968	1	0	0	0	1	0	0	1	1	0	YGR065C	Scer
Scer_chrVII:634086-634089	Scer_YGR071C.634089	1	0	0	0	1	0	0	0	0	1	YGR071C	Scer
Scer_chrVII:650664-650667	Scer_YGR086C.650667	0	1	1	0	1	0	1	0	0	1	YGR086C	Scer
Scer_chrVII:670337-670340	Scer_YGR093W.670337	1	0	0	0	0	1	1	1	0	1	YGR093W	Scer
Scer_chrVII:676401-676404	Scer_YGR095C.676404	1	0	0	0	1	0	0	0	1	0	YGR095C	Scer
Scer_chrVII:733803-733806	Scer_YGR122W.733803	1	0	0	0	1	0	0	0	0	1	YGR122W	Scer
Scer_chrVII:765664-765667	Scer_YGR138C.765667	0	1	1	0	1	0	0	0	0	1	YGR138C	Scer
Scer_chrVII:775042-775045	Scer_YGR143W.775042	0	1	1	0	1	0	0	0	0	1	YGR143W	Scer
Scer_chrVII:788761-788764	Scer_YGR149W.788761	1	0	0	0	1	0	0	0	1	0	YGR149W	Scer
Scer_chrVII:830464-830467	Scer_YGR166W.830464	1	0	0	0	1	0	0	0	0	1	YGR166W	Scer
Scer_chrVII:834504-834507	Scer_YGR168C.834507	1	0	0	0	1	0	0	0	0	1	YGR168C	Scer
Scer_chrVII:848463-848466	Scer_YGR175C.848466	0	1	1	0	1	0	0	1	1	0	YGR175C	Scer
Scer_chrVII:856342-856345	Scer_YGR180C.856345	0	1	1	0	1	0	0	0	1	0	YGR180C	Scer
Scer_chrVII:878212-878215	Scer_YGR189C.878215	0	1	0	1	1	0	0	0	0	1	YGR189C	Scer
Scer_chrVII:878249-878252	Scer_YGR189C.878252	0	1	0	1	1	0	0	0	1	0	YGR189C	Scer
Scer_chrVII:880352-880355	Scer_YGR191W.880352	0	1	0	1	1	0	0	0	0	1	YGR191W	Scer
Scer_chrVII:885787-885790	Scer_YGR193C.885790	0	1	1	0	1	0	0	0	0	1	YGR193C	Scer
Scer_chrVII:888854-888857	Scer_YGR195W.888854	0	1	0	1	1	0	0	0	0	1	YGR195W	Scer
Scer_chrVII:909116-909119	Scer_YGR205W.909116	0	1	0	1	1	0	0	0	0	1	YGR205W	Scer
Scer_chrVII:913261-913264	Scer_YGR209C.913264	0	1	0	1	0	1	1	0	0	1	YGR209C	Scer
Scer_chrVII:921831-921834	Scer_YGR215W.921831	1	0	0	0	1	0	0	0	1	0	YGR215W	Scer
Scer_chrVII:932370-932373	Scer_YGR218W.932370	0	1	1	0	1	0	0	0	0	1	YGR218W	Scer
Scer_chrVII:932497-932500	Scer_YGR218W.932497	0	1	1	0	1	0	1	0	0	1	YGR218W	Scer
Scer_chrVII:951115-951118	Scer_YGR229C.951118	0	1	0	1	1	0	0	0	0	1	YGR229C	Scer
Scer_chrVII:973778-973781	Scer_YGR240C.973781	0	1	1	0	0	1	0	1	0	1	YGR240C	Scer
Scer_chrVII:984939-984942	Scer_YGR247W.984939	0	1	1	0	1	0	0	0	0	1	YGR247W	Scer
Scer_chrVII:993550-993553	Scer_YGR250C.993553	0	1	0	1	1	0	0	0	0	1	YGR250C	Scer
Scer_chrVII:1012379-1012382	Scer_YGR260W.1012379	0	1	0	1	1	0	0	0	0	1	YGR260W	Scer
Scer_chrVII:1025790-1025793	Scer_YGR267C.1025793	0	1	0	1	1	0	0	1	0	1	YGR267C	Scer
Scer_chrVII:1076122-1076125	Scer_YGR289C.1076125	1	0	0	0	1	0	0	0	0	1	YGR289C	Scer
Scer_chrVII:1080888-1080891	Scer_YGR293C.1080891	1	0	0	0	1	0	0	0	0	1	YGR293C	Scer
Scer_chrVII:1080919-1080922	Scer_YGR293C.1080922	1	0	0	0	1	0	0	0	0	1	YGR293C	Scer
Scer_chrVIII:101928-101931	Scer_YHL003C.101931	0	1	1	0	1	0	0	0	0	1	YHL003C	Scer
Scer_chrVIII:94553-94556	Scer_YHL008C.94556	1	0	0	0	1	0	0	0	0	1	YHL008C	Scer
Scer_chrVIII:81636-81639	Scer_YHL011C.81639	0	1	0	1	0	1	1	0	0	1	YHL011C	Scer
Scer_chrVIII:74991-74994	Scer_YHL016C.74994	1	0	0	0	1	0	0	1	1	0	YHL016C	Scer
Scer_chrVIII:54243-54246	Scer_YHL026C.54246	1	0	0	0	1	0	0	0	1	0	YHL026C	Scer
Scer_chrVIII:51071-51074	Scer_YHL027W.51071	0	1	0	1	1	0	1	0	0	1	YHL027W	Scer
Scer_chrVIII:51091-51094	Scer_YHL027W.51091	0	1	1	0	1	0	0	1	0	1	YHL027W	Scer
Scer_chrVIII:34188-34191	Scer_YHL034C.34191	0	1	0	1	1	0	1	0	1	0	YHL034C	Scer
Scer_chrVIII:121714-121717	Scer_YHR007C.121717	0	1	1	0	0	1	1	0	0	1	YHR007C	Scer
Scer_chrVIII:123619-123622	Scer_YHR008C.123622	0	1	1	0	1	0	0	0	0	1	YHR008C	Scer
Scer_chrVIII:125889-125892	Scer_YHR009C.125892	0	1	0	1	1	0	0	0	0	1	YHR009C	Scer
Scer_chrVIII:125927-125930	Scer_YHR009C.125930	1	0	0	0	0	1	0	1	1	0	YHR009C	Scer
Scer_chrVIII:127570-127573	Scer_YHR011W.127570	1	0	0	0	0	1	0	0	0	1	YHR011W	Scer
Scer_chrVIII:148709-148712	Scer_YHR021C.148712	0	1	0	1	1	0	1	0	1	0	YHR021C	Scer
Scer_chrVIII:150445-150448	Scer_YHR022C.150448	1	0	0	0	1	0	0	0	0	1	YHR022C	Scer
Scer_chrVIII:150468-150471	Scer_YHR022C.150471	1	0	0	0	1	0	0	0	0	1	YHR022C	Scer
Scer_chrVIII:151148-151151	Scer_YHR022C.151151	1	0	0	0	1	0	0	0	1	0	YHR022C	Scer
Scer_chrVIII:160742-160745	Scer_YHR026W.160742	0	1	1	0	1	0	0	1	0	1	YHR026W	Scer
Scer_chrVIII:170397-170400	Scer_YHR030C.170400	0	1	1	0	0	1	1	1	0	1	YHR030C	Scer
Scer_chrVIII:173308-173311	Scer_YHR032W.173308	0	1	0	1	1	0	0	0	0	1	YHR032W	Scer
Scer_chrVIII:194889-194892	Scer_YHR044C.194892	1	0	0	0	1	0	0	0	0	1	YHR044C	Scer
Scer_chrVIII:194953-194956	Scer_YHR044C.194956	1	0	0	0	1	0	0	0	0	1	YHR044C	Scer
Scer_chrVIII:198408-198411	Scer_YHR046C.198411	1	0	0	0	1	0	0	0	1	0	YHR046C	Scer
Scer_chrVIII:207585-207588	Scer_YHR050W.207585	0	1	1	0	0	1	1	0	0	1	YHR050W	Scer
Scer_chrVIII:209669-209672	Scer_YHR051W.209669	0	1	1	0	0	1	1	1	0	1	YHR051W	Scer
Scer_chrVIII:212749-212752	Scer_YHR053C.212752	0	1	0	1	1	0	0	0	0	1	YHR053C	Scer
Scer_chrVIII:214747-214750	Scer_YHR055C.214750	0	1	0	1	1	0	0	0	0	1	YHR055C	Scer
Scer_chrVIII:239035-239038	Scer_YHR072W.239035	1	0	0	0	1	0	0	0	1	0	YHR072W	Scer
Scer_chrVIII:256232-256235	Scer_YHR078W.256232	1	0	0	0	1	0	0	0	1	0	YHR078W	Scer
Scer_chrVIII:261830-261833	Scer_YHR079C.261833	1	0	0	0	1	0	0	0	0	1	YHR079C	Scer
Scer_chrVIII:272326-272329	Scer_YHR082C.272329	0	1	0	1	1	0	0	0	1	0	YHR082C	Scer
Scer_chrVIII:320302-320305	Scer_YHR103W.320302	0	1	1	0	1	0	0	0	0	1	YHR103W	Scer
Scer_chrVIII:320363-320366	Scer_YHR103W.320363	0	1	1	0	1	0	0	0	0	1	YHR103W	Scer
Scer_chrVIII:338030-338033	Scer_YHR114W.338030	1	0	0	0	1	0	0	0	0	1	YHR114W	Scer
Scer_chrVIII:364177-364180	Scer_YHR129C.364180	0	1	1	0	1	0	1	0	0	1	YHR129C	Scer
Scer_chrVIII:374387-374390	Scer_YHR135C.374390	1	0	0	0	0	1	1	1	0	1	YHR135C	Scer
Scer_chrVIII:383498-383501	Scer_YHR142W.383498	0	1	1	0	1	0	0	0	0	1	YHR142W	Scer
Scer_chrVIII:412316-412319	Scer_YHR157W.412316	1	0	0	0	1	0	0	0	0	1	YHR157W	Scer
Scer_chrVIII:417518-417521	Scer_YHR159W.417518	0	1	0	1	1	0	0	0	0	1	YHR159W	Scer
Scer_chrVIII:422914-422917	Scer_YHR162W.422914	0	1	1	0	1	0	0	1	0	1	YHR162W	Scer
Scer_chrVIII:423015-423018	Scer_YHR162W.423015	0	1	1	0	0	1	1	0	0	1	YHR162W	Scer
Scer_chrVIII:437019-437022	Scer_YHR165C.437022	0	1	1	0	1	0	0	0	0	1	YHR165C	Scer
Scer_chrVIII:470909-470912	Scer_YHR183W.470909	0	1	1	0	0	1	1	1	0	1	YHR183W	Scer
Scer_chrVIII:490693-490696	Scer_YHR195W.490693	0	1	0	1	1	0	0	0	0	1	YHR195W	Scer
Scer_chrVIII:506290-506293	Scer_YHR204W.506290	1	0	0	0	1	0	0	0	0	1	YHR204W	Scer
Scer_chrVIII:519024-519027	Scer_YHR209W.519024	0	1	0	1	1	0	0	0	1	0	YHR209W	Scer
Scer_chrVIII:521769-521772	Scer_YHR210C.521772	0	1	0	1	1	0	0	0	0	1	YHR210C	Scer
Scer_chrVIII:542527-542530	Scer_YHR214W-A.542527	0	1	0	1	1	0	0	0	0	1	YHR214W-A	Scer
Scer_chrVIII:554326-554329	Scer_YHR216W.554326	0	1	1	0	1	0	0	0	0	1	YHR216W	Scer
Scer_chrVIII:557498-557501	Scer_YHR218W.557498	0	1	0	1	1	0	0	0	0	1	YHR218W	Scer
Scer_chrIX:353454-353457	Scer_YIL002C.353457	1	0	0	0	1	0	0	1	0	1	YIL002C	Scer
Scer_chrIX:343728-343731	Scer_YIL007C.343731	1	0	0	0	1	0	0	0	1	0	YIL007C	Scer
Scer_chrIX:301662-301665	Scer_YIL028W.301662	0	1	0	1	1	0	0	0	0	1	YIL028W	Scer
Scer_chrIX:301739-301742	Scer_YIL028W.301739	1	0	0	0	1	0	0	0	0	1	YIL028W	Scer
Scer_chrIX:301324-301327	Scer_YIL029C.301327	1	0	0	0	1	0	0	0	0	1	YIL029C	Scer
Scer_chrIX:282666-282669	Scer_YIL038C.282669	1	0	0	0	0	1	1	1	0	1	YIL038C	Scer
Scer_chrIX:278385-278388	Scer_YIL039W.278385	0	1	0	1	1	0	0	0	1	0	YIL039W	Scer
Scer_chrIX:261369-261372	Scer_YIL048W.261369	0	1	1	0	1	0	0	0	0	1	YIL048W	Scer
Scer_chrIX:261410-261413	Scer_YIL048W.261410	0	1	0	1	0	1	1	1	0	1	YIL048W	Scer
Scer_chrIX:258632-258635	Scer_YIL050W.258632	1	0	0	0	1	0	0	0	1	0	YIL050W	Scer
Scer_chrIX:257103-257106	Scer_YIL052C.257106	0	1	1	0	1	0	0	0	1	0	YIL052C	Scer
Scer_chrIX:247295-247298	Scer_YIL059C.247298	1	0	0	0	1	0	0	0	1	0	YIL059C	Scer
Scer_chrIX:247374-247377	Scer_YIL059C.247377	1	0	0	0	1	0	0	0	1	0	YIL059C	Scer
Scer_chrIX:216406-216409	Scer_YIL077C.216409	1	0	0	0	1	0	0	0	1	0	YIL077C	Scer
Scer_chrIX:203327-203330	Scer_YIL084C.203330	1	0	0	0	1	0	0	0	1	0	YIL084C	Scer
Scer_chrIX:187690-187693	Scer_YIL094C.187693	1	0	0	0	1	0	0	0	0	1	YIL094C	Scer
Scer_chrIX:160204-160207	Scer_YIL109C.160207	0	1	1	0	0	1	1	1	0	1	YIL109C	Scer
Scer_chrIX:148728-148731	Scer_YIL115C.148731	0	1	1	0	1	0	0	0	0	1	YIL115C	Scer
Scer_chrIX:141586-141589	Scer_YIL117C.141589	0	1	1	0	1	0	0	0	0	1	YIL117C	Scer
Scer_chrIX:137976-137979	Scer_YIL119C.137979	1	0	0	0	1	0	0	0	0	1	YIL119C	Scer
Scer_chrIX:130562-130565	Scer_YIL122W.130562	0	1	0	1	0	1	1	1	0	1	YIL122W	Scer
Scer_chrIX:126145-126148	Scer_YIL124W.126145	1	0	0	0	1	0	0	0	1	0	YIL124W	Scer
Scer_chrIX:122519-122522	Scer_YIL125W.122519	0	1	1	0	0	1	1	1	0	1	YIL125W	Scer
Scer_chrIX:122628-122631	Scer_YIL125W.122628	0	1	1	0	1	0	0	0	0	1	YIL125W	Scer
Scer_chrIX:97113-97116	Scer_YIL134C-A.97116	1	0	0	0	1	0	0	0	1	0	YIL134C-A	Scer
Scer_chrIX:414773-414776	Scer_YIR031C.414776	1	0	0	0	1	0	0	0	0	1	YIR031C	Scer
Scer_chrIX:414795-414798	Scer_YIR031C.414798	0	1	1	0	1	0	0	0	1	0	YIR031C	Scer
Scer_chrX:393908-393911	Scer_YJL025W.393908	1	0	0	0	1	0	0	0	0	1	YJL025W	Scer
Scer_chrX:392380-392383	Scer_YJL026W.392380	0	1	0	1	0	1	1	0	0	1	YJL026W	Scer
Scer_chrX:352181-352184	Scer_YJL047C.352184	0	1	1	0	1	0	0	0	0	1	YJL047C	Scer
Scer_chrX:338210-338213	Scer_YJL052W.338210	0	1	1	0	1	0	0	0	0	1	YJL052W	Scer
Scer_chrX:317124-317127	Scer_YJL063C.317127	1	0	0	0	1	0	0	0	1	0	YJL063C	Scer
Scer_chrX:315573-315576	Scer_YJL065C.315576	1	0	0	0	1	0	0	0	0	1	YJL065C	Scer
Scer_chrX:290818-290821	Scer_YJL079C.290821	0	1	1	0	1	0	0	0	0	1	YJL079C	Scer
Scer_chrX:289279-289282	Scer_YJL080C.289282	0	1	1	0	0	1	1	1	0	1	YJL080C	Scer
Scer_chrX:278022-278025	Scer_YJL084C.278025	0	1	1	0	1	0	0	0	0	1	YJL084C	Scer
Scer_chrX:272789-272792	Scer_YJL085W.272789	0	1	0	1	1	0	0	0	0	1	YJL085W	Scer
Scer_chrX:241979-241982	Scer_YJL098W.241979	1	0	0	0	0	1	0	1	0	1	YJL098W	Scer
Scer_chrX:237017-237020	Scer_YJL100W.237017	1	0	0	0	1	0	0	0	0	1	YJL100W	Scer
Scer_chrX:237207-237210	Scer_YJL100W.237207	1	0	0	0	1	0	0	0	0	1	YJL100W	Scer
Scer_chrX:236393-236396	Scer_YJL101C.236396	0	1	0	1	1	0	0	0	0	1	YJL101C	Scer
Scer_chrX:236400-236403	Scer_YJL101C.236403	0	1	1	0	1	0	1	0	0	1	YJL101C	Scer
Scer_chrX:220692-220695	Scer_YJL106W.220692	1	0	0	0	1	0	0	0	0	1	YJL106W	Scer
Scer_chrX:221336-221339	Scer_YJL106W.221336	0	1	0	1	1	0	0	0	0	1	YJL106W	Scer
Scer_chrX:187702-187705	Scer_YJL124C.187705	0	1	1	0	0	1	0	0	0	1	YJL124C	Scer
Scer_chrX:184467-184470	Scer_YJL126W.184467	1	0	0	0	1	0	0	0	1	0	YJL126W	Scer
Scer_chrX:160595-160598	Scer_YJL133W.160595	1	0	0	0	0	1	1	1	0	1	YJL133W	Scer
Scer_chrX:153050-153053	Scer_YJL139C.153053	1	0	0	0	0	1	1	1	0	1	YJL139C	Scer
Scer_chrX:150868-150871	Scer_YJL140W.150868	1	0	0	0	1	0	0	0	0	1	YJL140W	Scer
Scer_chrX:150405-150408	Scer_YJL141C.150408	1	0	0	0	1	0	0	0	0	1	YJL141C	Scer
Scer_chrX:128983-128986	Scer_YJL156C.128986	1	0	0	0	1	0	0	0	0	1	YJL156C	Scer
Scer_chrX:120409-120412	Scer_YJL159W.120409	0	1	0	1	0	1	1	1	0	1	YJL159W	Scer
Scer_chrX:95016-95019	Scer_YJL174W.95016	0	1	1	0	1	0	0	1	0	1	YJL174W	Scer
Scer_chrX:88712-88715	Scer_YJL179W.88712	1	0	0	0	1	0	0	0	1	0	YJL179W	Scer
Scer_chrX:31832-31835	Scer_YJL213W.31832	1	0	0	0	1	0	0	0	0	1	YJL213W	Scer
Scer_chrX:445533-445536	Scer_YJR004C.445536	1	0	0	0	1	0	0	0	0	1	YJR004C	Scer
Scer_chrX:450972-450975	Scer_YJR007W.450972	0	1	1	0	0	1	1	0	0	1	YJR007W	Scer
Scer_chrX:536020-536023	Scer_YJR054W.536020	1	0	0	0	1	0	0	0	0	1	YJR054W	Scer
Scer_chrX:545276-545279	Scer_YJR058C.545279	1	0	0	0	1	0	0	0	1	0	YJR058C	Scer
Scer_chrX:582371-582374	Scer_YJR082C.582374	1	0	0	0	1	0	0	0	1	0	YJR082C	Scer
Scer_chrX:620032-620035	Scer_YJR102C.620035	1	0	0	0	1	0	0	0	0	1	YJR102C	Scer
Scer_chrX:620366-620369	Scer_YJR102C.620369	1	0	0	0	1	0	0	0	1	0	YJR102C	Scer
Scer_chrX:620534-620537	Scer_YJR102C.620537	1	0	0	0	1	0	0	0	1	0	YJR102C	Scer
Scer_chrX:647501-647504	Scer_YJR121W.647501	0	1	0	1	1	0	0	0	1	0	YJR121W	Scer
Scer_chrX:675874-675877	Scer_YJR134C.675877	1	0	0	0	1	0	0	0	0	1	YJR134C	Scer
Scer_chrX:690569-690572	Scer_YJR139C.690572	0	1	0	1	1	0	0	0	0	1	YJR139C	Scer
Scer_chrX:725654-725657	Scer_YJR154W.725654	1	0	0	0	1	0	0	0	0	1	YJR154W	Scer
Scer_chrX:725711-725714	Scer_YJR154W.725711	1	0	0	0	1	0	0	0	0	1	YJR154W	Scer
Scer_chrXI:439461-439464	Scer_YKL001C.439464	1	0	0	0	1	0	0	0	1	0	YKL001C	Scer
Scer_chrXI:402521-402524	Scer_YKL019W.402521	1	0	0	0	1	0	0	0	1	0	YKL019W	Scer
Scer_chrXI:393389-393392	Scer_YKL023C-A.393392	1	0	0	0	1	0	0	0	0	1	YKL023C-A	Scer
Scer_chrXI:389969-389972	Scer_YKL026C.389972	1	0	0	0	1	0	0	0	0	1	YKL026C	Scer
Scer_chrXI:384872-384875	Scer_YKL029C.384875	1	0	0	0	1	0	0	0	1	0	YKL029C	Scer
Scer_chrXI:381893-381896	Scer_YKL032C.381896	0	1	0	1	0	1	1	1	0	1	YKL032C	Scer
Scer_chrXI:362222-362225	Scer_YKL040C.362225	1	0	0	0	1	0	0	0	1	0	YKL040C	Scer
Scer_chrXI:360044-360047	Scer_YKL041W.360044	1	0	0	0	1	0	0	1	1	0	YKL041W	Scer
Scer_chrXI:339481-339484	Scer_YKL053C-A.339484	0	1	0	1	1	0	0	1	0	1	YKL053C-A	Scer
Scer_chrXI:338805-338808	Scer_YKL054C.338808	0	1	0	1	0	1	1	1	0	1	YKL054C	Scer
Scer_chrXI:325530-325533	Scer_YKL061W.325530	1	0	0	0	1	0	0	0	1	0	YKL061W	Scer
Scer_chrXI:321537-321540	Scer_YKL063C.321540	0	1	0	1	0	1	0	1	0	1	YKL063C	Scer
Scer_chrXI:321628-321631	Scer_YKL063C.321631	0	1	0	1	1	0	0	0	0	1	YKL063C	Scer
Scer_chrXI:317662-317665	Scer_YKL064W.317662	1	0	0	0	0	1	1	0	0	1	YKL064W	Scer
Scer_chrXI:262257-262260	Scer_YKL095W.262257	0	1	0	1	1	0	0	1	0	1	YKL095W	Scer
Scer_chrXI:248824-248827	Scer_YKL101W.248824	0	1	1	0	1	0	0	0	0	1	YKL101W	Scer
Scer_chrXI:245452-245455	Scer_YKL104C.245455	0	1	0	1	1	0	1	0	0	1	YKL104C	Scer
Scer_chrXI:231977-231980	Scer_YKL109W.231977	1	0	0	0	0	1	1	1	0	1	YKL109W	Scer
Scer_chrXI:232165-232168	Scer_YKL109W.232165	1	0	0	0	0	1	1	1	0	1	YKL109W	Scer
Scer_chrXI:217245-217248	Scer_YKL120W.217245	1	0	0	0	1	0	0	0	0	1	YKL120W	Scer
Scer_chrXI:208200-208203	Scer_YKL125W.208200	0	1	1	0	1	0	0	0	0	1	YKL125W	Scer
Scer_chrXI:205605-205608	Scer_YKL126W.205605	0	1	0	1	1	0	0	0	0	1	YKL126W	Scer
Scer_chrXI:205653-205656	Scer_YKL126W.205653	0	1	1	0	1	0	0	0	0	1	YKL126W	Scer
Scer_chrXI:150902-150905	Scer_YKL161C.150905	1	0	0	0	1	0	0	0	0	1	YKL161C	Scer
Scer_chrXI:143644-143647	Scer_YKL163W.143644	1	0	0	0	0	1	1	1	0	1	YKL163W	Scer
Scer_chrXI:143683-143686	Scer_YKL163W.143683	1	0	0	0	1	0	0	0	0	1	YKL163W	Scer
Scer_chrXI:143763-143766	Scer_YKL163W.143763	1	0	0	0	1	0	0	0	0	1	YKL163W	Scer
Scer_chrXI:142870-142873	Scer_YKL164C.142873	0	1	0	1	1	0	0	0	0	1	YKL164C	Scer
Scer_chrXI:136996-136999	Scer_YKL165C-A.136999	1	0	0	0	1	0	0	0	1	0	YKL165C-A	Scer
Scer_chrXI:107108-107111	Scer_YKL181W.107108	1	0	0	0	1	0	0	1	1	0	YKL181W	Scer
Scer_chrXI:107246-107249	Scer_YKL181W.107246	0	1	0	1	0	1	1	1	0	1	YKL181W	Scer
Scer_chrXI:107269-107272	Scer_YKL181W.107269	0	1	0	1	0	1	1	1	0	1	YKL181W	Scer
Scer_chrXI:100394-100397	Scer_YKL182W.100394	0	1	1	0	1	0	1	0	0	1	YKL182W	Scer
Scer_chrXI:100479-100482	Scer_YKL182W.100479	0	1	0	1	1	0	0	1	0	1	YKL182W	Scer
Scer_chrXI:100529-100532	Scer_YKL182W.100529	1	0	0	0	0	1	1	1	0	1	YKL182W	Scer
Scer_chrXI:98563-98566	Scer_YKL183W.98563	1	0	0	0	1	0	0	0	1	0	YKL183W	Scer
Scer_chrXI:98665-98668	Scer_YKL183W.98665	0	1	0	1	0	1	0	0	0	1	YKL183W	Scer
Scer_chrXI:96700-96703	Scer_YKL184W.96700	0	1	1	0	1	0	1	0	0	1	YKL184W	Scer
Scer_chrXI:82906-82909	Scer_YKL190W.82906	1	0	0	0	0	1	1	1	1	0	YKL190W	Scer
Scer_chrXI:70320-70323	Scer_YKL198C.70323	1	0	0	0	0	1	0	0	0	1	YKL198C	Scer
Scer_chrXI:34485-34488	Scer_YKL212W.34485	0	1	0	1	1	0	0	1	0	1	YKL212W	Scer
Scer_chrXI:25195-25198	Scer_YKL216W.25195	0	1	1	0	1	0	0	0	0	1	YKL216W	Scer
Scer_chrXI:445318-445321	Scer_YKR003W.445318	1	0	0	0	1	0	0	0	1	0	YKR003W	Scer
Scer_chrXI:483159-483162	Scer_YKR022C.483162	1	0	0	0	1	0	0	0	0	1	YKR022C	Scer
Scer_chrXI:494156-494159	Scer_YKR028W.494156	0	1	1	0	1	0	0	0	0	1	YKR028W	Scer
Scer_chrXI:514152-514155	Scer_YKR039W.514152	1	0	0	0	1	0	0	0	1	0	YKR039W	Scer
Scer_chrXI:519399-519402	Scer_YKR042W.519399	0	1	0	1	0	1	1	1	0	1	YKR042W	Scer
Scer_chrXI:521882-521885	Scer_YKR044W.521882	1	0	0	0	1	0	0	0	1	0	YKR044W	Scer
Scer_chrXI:557565-557568	Scer_YKR061W.557565	1	0	0	0	1	0	0	0	1	0	YKR061W	Scer
Scer_chrXI:611440-611443	Scer_YKR091W.611440	1	0	0	0	0	1	0	1	1	0	YKR091W	Scer
Scer_chrXI:615700-615703	Scer_YKR093W.615700	0	1	1	0	1	0	0	0	0	1	YKR093W	Scer
Scer_chrXII:87215-87218	Scer_YLL027W.87215	1	0	0	0	0	1	1	1	0	1	YLL027W	Scer
Scer_chrXII:84702-84705	Scer_YLL028W.84702	0	1	0	1	1	0	0	0	0	1	YLL028W	Scer
Scer_chrXII:39522-39525	Scer_YLL051C.39525	1	0	0	0	0	1	1	1	0	1	YLL051C	Scer
Scer_chrXII:36694-36697	Scer_YLL052C.36697	1	0	0	0	1	0	0	0	1	0	YLL052C	Scer
Scer_chrXII:164039-164042	Scer_YLR006C.164042	0	1	1	0	1	0	0	0	0	1	YLR006C	Scer
Scer_chrXII:166477-166480	Scer_YLR009W.166477	0	1	0	1	0	1	0	0	0	1	YLR009W	Scer
Scer_chrXII:180218-180221	Scer_YLR019W.180218	0	1	1	0	0	1	0	0	0	1	YLR019W	Scer
Scer_chrXII:183588-183591	Scer_YLR021W.183588	1	0	0	0	1	0	0	0	1	0	YLR021W	Scer
Scer_chrXII:211965-211968	Scer_YLR034C.211968	0	1	0	1	1	0	0	0	0	1	YLR034C	Scer
Scer_chrXII:238908-238911	Scer_YLR046C.238911	1	0	0	0	1	0	0	0	0	1	YLR046C	Scer
Scer_chrXII:241633-241636	Scer_YLR047C.241636	1	0	0	0	1	0	0	0	0	1	YLR047C	Scer
Scer_chrXII:242207-242210	Scer_YLR048W.242207	0	1	0	1	1	0	1	0	0	1	YLR048W	Scer
Scer_chrXII:281758-281761	Scer_YLR073C.281761	1	0	0	0	0	1	1	1	1	0	YLR073C	Scer
Scer_chrXII:320062-320065	Scer_YLR089C.320065	0	1	1	0	1	0	1	0	0	1	YLR089C	Scer
Scer_chrXII:341760-341763	Scer_YLR100W.341760	1	0	0	0	1	0	0	0	1	0	YLR100W	Scer
Scer_chrXII:371547-371550	Scer_YLR113W.371547	0	1	0	1	0	1	1	1	0	1	YLR113W	Scer
Scer_chrXII:388256-388259	Scer_YLR120C.388259	0	1	0	1	0	1	1	1	0	1	YLR120C	Scer
Scer_chrXII:391702-391705	Scer_YLR123C.391705	1	0	0	0	1	0	0	0	0	1	YLR123C	Scer
Scer_chrXII:395575-395578	Scer_YLR126C.395578	1	0	0	0	1	0	0	0	0	1	YLR126C	Scer
Scer_chrXII:440422-440425	Scer_YLR150W.440422	0	1	0	1	0	1	1	1	1	0	YLR150W	Scer
Scer_chrXII:444757-444760	Scer_YLR152C.444760	1	0	0	0	1	0	0	0	0	1	YLR152C	Scer
Scer_chrXII:451664-451667	Scer_YLR154W-A.451664	1	0	0	0	1	0	0	0	0	1	YLR154W-A	Scer
Scer_chrXII:454653-454656	Scer_YLR154W-C.454653	1	0	0	0	1	0	0	0	0	1	YLR154W-C	Scer
Scer_chrXII:470496-470499	Scer_YLR155C.470499	1	0	0	0	1	0	0	0	0	1	YLR155C	Scer
Scer_chrXII:470536-470539	Scer_YLR155C.470539	1	0	0	0	1	0	0	0	0	1	YLR155C	Scer
Scer_chrXII:474148-474151	Scer_YLR157C.474151	1	0	0	0	1	0	0	0	0	1	YLR157C	Scer
Scer_chrXII:474188-474191	Scer_YLR157C.474191	1	0	0	0	1	0	0	0	0	1	YLR157C	Scer
Scer_chrXII:483728-483731	Scer_YLR158C.483731	1	0	0	0	1	0	0	0	0	1	YLR158C	Scer
Scer_chrXII:483768-483771	Scer_YLR158C.483771	1	0	0	0	1	0	0	0	0	1	YLR158C	Scer
Scer_chrXII:487380-487383	Scer_YLR160C.487383	1	0	0	0	1	0	0	0	0	1	YLR160C	Scer
Scer_chrXII:487420-487423	Scer_YLR160C.487423	1	0	0	0	1	0	0	0	0	1	YLR160C	Scer
Scer_chrXII:493613-493616	Scer_YLR164W.493613	1	0	0	0	1	0	0	0	0	1	YLR164W	Scer
Scer_chrXII:528246-528249	Scer_YLR188W.528246	1	0	0	0	0	1	1	1	0	1	YLR188W	Scer
Scer_chrXII:534970-534973	Scer_YLR190W.534970	0	1	1	0	1	0	0	0	0	1	YLR190W	Scer
Scer_chrXII:554456-554459	Scer_YLR206W.554456	0	1	1	0	1	0	0	0	0	1	YLR206W	Scer
Scer_chrXII:576771-576774	Scer_YLR220W.576771	0	1	1	0	1	0	0	0	0	1	YLR220W	Scer
Scer_chrXII:585560-585563	Scer_YLR223C.585563	0	1	1	0	1	0	1	0	0	1	YLR223C	Scer
Scer_chrXII:586286-586289	Scer_YLR224W.586286	0	1	1	0	1	0	0	0	1	0	YLR224W	Scer
Scer_chrXII:604805-604808	Scer_YLR229C.604808	0	1	0	1	0	1	1	1	0	1	YLR229C	Scer
Scer_chrXII:623920-623923	Scer_YLR242C.623923	1	0	0	0	1	0	0	1	0	1	YLR242C	Scer
Scer_chrXII:634140-634143	Scer_YLR248W.634140	0	1	0	1	1	0	0	0	0	1	YLR248W	Scer
Scer_chrXII:646167-646170	Scer_YLR256W.646167	0	1	1	0	1	0	1	0	0	1	YLR256W	Scer
Scer_chrXII:646293-646296	Scer_YLR256W.646293	0	1	1	0	0	1	1	0	0	1	YLR256W	Scer
Scer_chrXII:658704-658707	Scer_YLR257W.658704	0	1	1	0	1	0	0	0	0	1	YLR257W	Scer
Scer_chrXII:660689-660692	Scer_YLR258W.660689	0	1	1	0	1	0	0	0	0	1	YLR258W	Scer
Scer_chrXII:668930-668933	Scer_YLR262C.668933	0	1	1	0	1	0	0	0	0	1	YLR262C	Scer
Scer_chrXII:682427-682430	Scer_YLR271W.682427	1	0	0	0	1	0	0	0	1	0	YLR271W	Scer
Scer_chrXII:710172-710175	Scer_YLR286C.710175	0	1	1	0	1	0	0	1	0	1	YLR286C	Scer
Scer_chrXII:710232-710235	Scer_YLR286C.710235	0	1	0	1	1	0	0	0	0	1	YLR286C	Scer
Scer_chrXII:710314-710317	Scer_YLR286C.710317	0	1	1	0	1	0	0	0	0	1	YLR286C	Scer
Scer_chrXII:712155-712158	Scer_YLR287C.712158	1	0	0	0	1	0	0	0	0	1	YLR287C	Scer
Scer_chrXII:712476-712479	Scer_YLR287C.712479	1	0	0	0	1	0	0	0	1	0	YLR287C	Scer
Scer_chrXII:722466-722469	Scer_YLR295C.722469	1	0	0	0	1	0	0	0	1	0	YLR295C	Scer
Scer_chrXII:725694-725697	Scer_YLR299W.725694	1	0	0	0	1	0	0	0	1	0	YLR299W	Scer
Scer_chrXII:728892-728895	Scer_YLR300W.728892	0	1	1	0	1	0	0	1	0	1	YLR300W	Scer
Scer_chrXII:762364-762367	Scer_YLR313C.762367	1	0	0	0	1	0	0	0	0	1	YLR313C	Scer
Scer_chrXII:784823-784826	Scer_YLR328W.784823	1	0	0	0	0	1	0	0	0	1	YLR328W	Scer
Scer_chrXII:787622-787625	Scer_YLR330W.787622	1	0	0	0	1	0	0	0	1	0	YLR330W	Scer
Scer_chrXII:790605-790608	Scer_YLR332W.790605	0	1	1	0	1	0	0	0	0	1	YLR332W	Scer
Scer_chrXII:805848-805851	Scer_YLR340W.805848	0	1	0	1	0	1	1	1	0	1	YLR340W	Scer
Scer_chrXII:809766-809769	Scer_YLR342W.809766	0	1	0	1	1	0	0	0	0	1	YLR342W	Scer
Scer_chrXII:809945-809948	Scer_YLR342W.809945	0	1	0	1	0	1	1	1	0	1	YLR342W	Scer
Scer_chrXII:809968-809971	Scer_YLR342W.809968	0	1	0	1	0	1	1	1	0	1	YLR342W	Scer
Scer_chrXII:822705-822708	Scer_YLR346C.822708	1	0	0	0	1	0	0	0	1	0	YLR346C	Scer
Scer_chrXII:826448-826451	Scer_YLR347C.826451	0	1	0	1	0	1	1	1	0	1	YLR347C	Scer
Scer_chrXII:834294-834297	Scer_YLR353W.834294	0	1	1	0	0	1	0	0	0	1	YLR353W	Scer
Scer_chrXII:844237-844240	Scer_YLR359W.844237	0	1	1	0	1	0	0	0	0	1	YLR359W	Scer
Scer_chrXII:846073-846076	Scer_YLR360W.846073	0	1	0	1	0	1	1	1	0	1	YLR360W	Scer
Scer_chrXII:857512-857515	Scer_YLR368W.857512	0	1	0	1	1	0	0	0	0	1	YLR368W	Scer
Scer_chrXII:867270-867273	Scer_YLR372W.867270	0	1	1	0	1	0	0	0	0	1	YLR372W	Scer
Scer_chrXII:867330-867333	Scer_YLR372W.867330	0	1	1	0	0	1	1	1	0	1	YLR372W	Scer
Scer_chrXII:877257-877260	Scer_YLR378C.877260	0	1	1	0	0	1	1	1	0	1	YLR378C	Scer
Scer_chrXII:878236-878239	Scer_YLR380W.878236	0	1	0	1	1	0	0	0	0	1	YLR380W	Scer
Scer_chrXII:932721-932724	Scer_YLR406C-A.932724	1	0	0	0	1	0	0	0	1	0	YLR406C-A	Scer
Scer_chrXII:932912-932915	Scer_YLR407W.932912	0	1	1	0	0	1	1	0	0	1	YLR407W	Scer
Scer_chrXII:951106-951109	Scer_YLR413W.951106	1	0	0	0	1	0	0	0	1	0	YLR413W	Scer
Scer_chrXII:954205-954208	Scer_YLR414C.954208	0	1	1	0	1	0	0	1	0	1	YLR414C	Scer
Scer_chrXII:982873-982876	Scer_YLR425W.982873	0	1	0	1	1	0	0	0	0	1	YLR425W	Scer
Scer_chrXII:1001814-1001817	Scer_YLR431C.1001817	1	0	0	0	1	0	0	0	0	1	YLR431C	Scer
Scer_chrXII:1043492-1043495	Scer_YLR453C.1043495	1	0	0	0	1	0	0	0	1	0	YLR453C	Scer
Scer_chrXII:1060989-1060992	Scer_YLR460C.1060992	0	1	0	1	1	0	0	0	1	0	YLR460C	Scer
Scer_chrXII:1065660-1065663	Scer_YLR462W.1065660	0	1	0	1	1	0	0	0	0	1	YLR462W	Scer
Scer_chrXII:1072193-1072196	Scer_YLR467W.1072193	0	1	0	1	1	0	0	0	0	1	YLR467W	Scer
Scer_chrXIII:262848-262851	Scer_YML003W.262848	1	0	0	0	1	0	0	0	1	0	YML003W	Scer
Scer_chrXIII:263461-263464	Scer_YML003W.263461	1	0	0	0	1	0	0	0	0	1	YML003W	Scer
Scer_chrXIII:258899-258902	Scer_YML006C.258902	1	0	0	0	1	0	0	0	0	1	YML006C	Scer
Scer_chrXIII:253762-253765	Scer_YML007W.253762	1	0	0	0	1	0	0	0	0	1	YML007W	Scer
Scer_chrXIII:241559-241562	Scer_YML016C.241562	0	1	0	1	1	0	0	0	0	1	YML016C	Scer
Scer_chrXIII:241588-241591	Scer_YML016C.241591	0	1	1	0	0	1	1	1	0	1	YML016C	Scer
Scer_chrXIII:241669-241672	Scer_YML016C.241672	0	1	1	0	1	0	0	0	0	1	YML016C	Scer
Scer_chrXIII:241725-241728	Scer_YML016C.241728	1	0	0	0	0	1	1	1	0	1	YML016C	Scer
Scer_chrXIII:228687-228690	Scer_YML023C.228690	1	0	0	0	0	1	0	1	0	1	YML023C	Scer
Scer_chrXIII:204194-204197	Scer_YML038C.204197	0	1	0	1	0	1	1	0	0	1	YML038C	Scer
Scer_chrXIII:164653-164656	Scer_YML055W.164653	1	0	0	0	1	0	0	0	1	0	YML055W	Scer
Scer_chrXIII:164710-164713	Scer_YML055W.164710	1	0	0	0	1	0	0	0	1	0	YML055W	Scer
Scer_chrXIII:164272-164275	Scer_YML056C.164275	1	0	0	0	0	1	1	1	1	0	YML056C	Scer
Scer_chrXIII:159362-159365	Scer_YML058W.159362	0	1	0	1	1	0	0	0	0	1	YML058W	Scer
Scer_chrXIII:145965-145968	Scer_YML064C.145968	1	0	0	0	1	0	0	0	1	0	YML064C	Scer
Scer_chrXIII:137489-137492	Scer_YML068W.137489	1	0	0	0	1	0	0	0	0	1	YML068W	Scer
Scer_chrXIII:137529-137532	Scer_YML068W.137529	1	0	0	0	0	1	1	1	0	1	YML068W	Scer
Scer_chrXIII:131612-131615	Scer_YML071C.131615	0	1	1	0	1	0	0	0	0	1	YML071C	Scer
Scer_chrXIII:97385-97388	Scer_YML086C.97388	0	1	0	1	1	0	0	0	0	1	YML086C	Scer
Scer_chrXIII:56592-56595	Scer_YML106W.56592	0	1	1	0	1	0	0	0	0	1	YML106W	Scer
Scer_chrXIII:56630-56633	Scer_YML106W.56630	0	1	1	0	1	0	1	1	0	1	YML106W	Scer
Scer_chrXIII:56697-56700	Scer_YML106W.56697	0	1	1	0	0	1	1	1	0	1	YML106W	Scer
Scer_chrXIII:56727-56730	Scer_YML106W.56727	1	0	0	0	0	1	1	1	0	1	YML106W	Scer
Scer_chrXIII:54713-54716	Scer_YML108W.54713	1	0	0	0	1	0	0	0	1	0	YML108W	Scer
Scer_chrXIII:38142-38145	Scer_YML116W.38142	0	1	0	1	1	0	0	0	0	1	YML116W	Scer
Scer_chrXIII:34219-34222	Scer_YML117W.34219	0	1	1	0	1	0	0	0	0	1	YML117W	Scer
Scer_chrXIII:26843-26846	Scer_YML121W.26843	0	1	0	1	1	0	0	0	1	0	YML121W	Scer
Scer_chrXIII:16756-16759	Scer_YML128C.16759	1	0	0	0	1	0	0	0	1	0	YML128C	Scer
Scer_chrXIII:4954-4957	Scer_YML133C.4957	1	0	0	0	1	0	0	0	0	1	YML133C	Scer
Scer_chrXIII:271204-271207	Scer_YMR001C.271207	0	1	1	0	1	0	0	0	0	1	YMR001C	Scer
Scer_chrXIII:279754-279757	Scer_YMR006C.279757	0	1	0	1	1	0	0	0	1	0	YMR006C	Scer
Scer_chrXIII:283755-283758	Scer_YMR009W.283755	1	0	0	0	1	0	0	0	1	0	YMR009W	Scer
Scer_chrXIII:284871-284874	Scer_YMR010W.284871	1	0	0	0	0	1	1	1	1	0	YMR010W	Scer
Scer_chrXIII:284952-284955	Scer_YMR010W.284952	0	1	0	1	1	0	0	0	0	1	YMR010W	Scer
Scer_chrXIII:340825-340828	Scer_YMR034C.340828	1	0	0	0	1	0	0	0	0	1	YMR034C	Scer
Scer_chrXIII:350201-350204	Scer_YMR040W.350201	1	0	0	0	1	0	0	0	1	0	YMR040W	Scer
Scer_chrXIII:353848-353851	Scer_YMR043W.353848	0	1	0	1	1	0	0	1	0	1	YMR043W	Scer
Scer_chrXIII:362207-362210	Scer_YMR046W-A.362207	1	0	0	0	1	0	0	0	0	1	YMR046W-A	Scer
Scer_chrXIII:448157-448160	Scer_YMR089C.448160	0	1	1	0	1	0	0	0	0	1	YMR089C	Scer
Scer_chrXIII:448233-448236	Scer_YMR089C.448236	0	1	1	0	0	1	1	0	0	1	YMR089C	Scer
Scer_chrXIII:448512-448515	Scer_YMR090W.448512	1	0	0	0	1	0	0	0	1	0	YMR090W	Scer
Scer_chrXIII:466168-466171	Scer_YMR100W.466168	0	1	0	1	1	0	0	1	0	1	YMR100W	Scer
Scer_chrXIII:484031-484034	Scer_YMR108W.484031	0	1	0	1	1	0	1	1	0	1	YMR108W	Scer
Scer_chrXIII:484042-484045	Scer_YMR108W.484042	0	1	1	0	0	1	1	1	0	1	YMR108W	Scer
Scer_chrXIII:512981-512984	Scer_YMR123W.512981	1	0	0	0	1	0	0	0	1	0	YMR123W	Scer
Scer_chrXIII:521870-521873	Scer_YMR126C.521873	0	1	1	0	1	0	0	0	0	1	YMR126C	Scer
Scer_chrXIII:521985-521988	Scer_YMR126C.521988	1	0	0	0	1	0	0	0	0	1	YMR126C	Scer
Scer_chrXIII:540087-540090	Scer_YMR135C.540090	1	0	0	0	1	0	0	0	0	1	YMR135C	Scer
Scer_chrXIII:546062-546065	Scer_YMR139W.546062	0	1	1	0	1	0	0	1	0	1	YMR139W	Scer
Scer_chrXIII:556510-556513	Scer_YMR145C.556513	0	1	1	0	0	1	1	1	0	1	YMR145C	Scer
Scer_chrXIII:556636-556639	Scer_YMR145C.556639	1	0	0	0	0	1	1	1	0	1	YMR145C	Scer
Scer_chrXIII:560277-560280	Scer_YMR148W.560277	0	1	1	0	1	0	1	0	0	1	YMR148W	Scer
Scer_chrXIII:605680-605683	Scer_YMR171C.605683	1	0	0	0	0	1	0	0	0	1	YMR171C	Scer
Scer_chrXIII:611704-611707	Scer_YMR176W.611704	1	0	0	0	1	0	0	0	0	1	YMR176W	Scer
Scer_chrXIII:623237-623240	Scer_YMR180C.623240	1	0	0	0	1	0	0	0	0	1	YMR180C	Scer
Scer_chrXIII:647075-647078	Scer_YMR192W.647075	1	0	0	0	1	0	0	0	0	1	YMR192W	Scer
Scer_chrXIII:653982-653985	Scer_YMR195W.653982	1	0	0	0	0	1	1	1	0	1	YMR195W	Scer
Scer_chrXIII:664699-664702	Scer_YMR200W.664699	0	1	0	1	1	0	0	1	0	1	YMR200W	Scer
Scer_chrXIII:674787-674790	Scer_YMR205C.674790	0	1	1	0	0	1	1	1	0	1	YMR205C	Scer
Scer_chrXIII:701139-701142	Scer_YMR216C.701142	0	1	1	0	1	0	0	0	0	1	YMR216C	Scer
Scer_chrXIII:716348-716351	Scer_YMR222C.716351	1	0	0	0	1	0	1	0	1	0	YMR222C	Scer
Scer_chrXIII:731961-731964	Scer_YMR229C.731964	1	0	0	0	1	0	1	0	1	0	YMR229C	Scer
Scer_chrXIII:733146-733149	Scer_YMR230W-A.733146	0	1	1	0	1	0	0	0	1	0	YMR230W-A	Scer
Scer_chrXIII:740184-740187	Scer_YMR234W.740184	1	0	0	0	0	1	1	1	1	0	YMR234W	Scer
Scer_chrXIII:749726-749729	Scer_YMR239C.749729	1	0	0	0	0	1	1	1	0	1	YMR239C	Scer
Scer_chrXIII:751836-751839	Scer_YMR241W.751836	0	1	1	0	1	0	0	1	0	1	YMR241W	Scer
Scer_chrXIII:751918-751921	Scer_YMR241W.751918	0	1	1	0	0	1	1	1	0	1	YMR241W	Scer
Scer_chrXIII:759626-759629	Scer_YMR246W.759626	0	1	1	0	1	0	0	1	0	1	YMR246W	Scer
Scer_chrXIII:759779-759782	Scer_YMR246W.759779	0	1	1	0	1	0	0	0	0	1	YMR246W	Scer
Scer_chrXIII:777874-777877	Scer_YMR255W.777874	1	0	0	0	1	0	0	0	1	0	YMR255W	Scer
Scer_chrXIII:784305-784308	Scer_YMR258C.784308	1	0	0	0	0	1	1	1	0	1	YMR258C	Scer
Scer_chrXIII:801742-801745	Scer_YMR267W.801742	0	1	0	1	1	0	0	0	0	1	YMR267W	Scer
Scer_chrXIII:804418-804421	Scer_YMR269W.804418	1	0	0	0	1	0	0	0	1	0	YMR269W	Scer
Scer_chrXIII:808043-808046	Scer_YMR271C.808046	1	0	0	0	1	0	0	0	0	1	YMR271C	Scer
Scer_chrXIII:860946-860949	Scer_YMR296C.860949	0	1	1	0	1	0	1	0	0	1	YMR296C	Scer
Scer_chrXIII:880273-880276	Scer_YMR305C.880276	0	1	1	0	1	0	0	1	0	1	YMR305C	Scer
Scer_chrXIII:886962-886965	Scer_YMR307W.886962	0	1	0	1	1	0	0	0	1	0	YMR307W	Scer
Scer_chrXIII:892255-892258	Scer_YMR308C.892258	0	1	0	1	1	0	1	0	0	1	YMR308C	Scer
Scer_chrXIII:904187-904190	Scer_YMR315W-A.904187	1	0	0	0	1	0	0	0	0	1	YMR315W-A	Scer
Scer_chrXIII:914661-914664	Scer_YMR319C.914664	1	0	0	0	1	0	0	0	0	1	YMR319C	Scer
Scer_chrXIII:914710-914713	Scer_YMR319C.914713	1	0	0	0	1	0	0	0	1	0	YMR319C	Scer
Scer_chrXIII:915850-915853	Scer_YMR320W.915850	1	0	0	0	1	0	0	0	1	0	YMR320W	Scer
Scer_chrXIV:625857-625860	Scer_YNL003C.625860	1	0	0	0	1	0	0	0	0	1	YNL003C	Scer
Scer_chrXIV:619677-619680	Scer_YNL007C.619680	0	1	1	0	1	0	0	0	0	1	YNL007C	Scer
Scer_chrXIV:559696-559699	Scer_YNL036W.559696	1	0	0	0	1	0	0	0	1	0	YNL036W	Scer
Scer_chrXIV:559073-559076	Scer_YNL037C.559076	0	1	0	1	0	1	0	0	0	1	YNL037C	Scer
Scer_chrXIV:548061-548064	Scer_YNL042W.548061	1	0	0	0	1	0	0	0	0	1	YNL042W	Scer
Scer_chrXIV:546013-546016	Scer_YNL043C.546016	1	0	0	0	1	0	0	0	0	1	YNL043C	Scer
Scer_chrXIV:529838-529841	Scer_YNL053W.529838	1	0	0	0	0	1	1	1	0	1	YNL053W	Scer
Scer_chrXIV:507660-507663	Scer_YNL063W.507660	0	1	0	1	1	0	0	0	0	1	YNL063W	Scer
Scer_chrXIV:507720-507723	Scer_YNL063W.507720	1	0	0	0	1	0	1	0	0	1	YNL063W	Scer
Scer_chrXIV:507146-507149	Scer_YNL064C.507149	0	1	0	1	1	0	1	0	0	1	YNL064C	Scer
Scer_chrXIV:507166-507169	Scer_YNL064C.507169	0	1	1	0	0	1	1	1	0	1	YNL064C	Scer
Scer_chrXIV:483398-483401	Scer_YNL076W.483398	1	0	0	0	0	1	1	1	0	1	YNL076W	Scer
Scer_chrXIV:483521-483524	Scer_YNL076W.483521	0	1	0	1	1	0	1	0	0	1	YNL076W	Scer
Scer_chrXIV:466969-466972	Scer_YNL085W.466969	0	1	1	0	1	0	0	0	0	1	YNL085W	Scer
Scer_chrXIV:467082-467085	Scer_YNL085W.467082	0	1	1	0	1	0	1	0	0	1	YNL085W	Scer
Scer_chrXIV:456529-456532	Scer_YNL090W.456529	0	1	0	1	0	1	0	1	0	1	YNL090W	Scer
Scer_chrXIV:447456-447459	Scer_YNL094W.447456	1	0	0	0	0	1	1	1	0	1	YNL094W	Scer
Scer_chrXIV:441305-441308	Scer_YNL097W-A.441305	1	0	0	0	1	0	0	0	0	1	YNL097W-A	Scer
Scer_chrXIV:440593-440596	Scer_YNL098C.440596	0	1	1	0	0	1	1	1	0	1	YNL098C	Scer
Scer_chrXIV:426825-426828	Scer_YNL104C.426828	0	1	1	0	1	0	0	0	0	1	YNL104C	Scer
Scer_chrXIV:412260-412263	Scer_YNL115C.412263	1	0	0	0	1	0	0	0	1	0	YNL115C	Scer
Scer_chrXIV:392300-392303	Scer_YNL125C.392303	1	0	0	0	0	1	1	1	0	1	YNL125C	Scer
Scer_chrXIV:378731-378734	Scer_YNL131W.378731	0	1	0	1	1	0	0	0	0	1	YNL131W	Scer
Scer_chrXIV:357226-357229	Scer_YNL142W.357226	1	0	0	0	1	0	1	0	0	1	YNL142W	Scer
Scer_chrXIV:350854-350857	Scer_YNL147W.350854	1	0	0	0	1	0	0	0	1	0	YNL147W	Scer
Scer_chrXIV:342011-342014	Scer_YNL156C.342014	0	1	0	1	1	0	0	1	0	1	YNL156C	Scer
Scer_chrXIV:342173-342176	Scer_YNL156C.342176	1	0	0	0	1	0	0	1	1	0	YNL156C	Scer
Scer_chrXIV:332563-332566	Scer_YNL161W.332563	0	1	0	1	1	0	1	0	0	1	YNL161W	Scer
Scer_chrXIV:326336-326339	Scer_YNL164C.326339	1	0	0	0	0	1	1	1	0	1	YNL164C	Scer
Scer_chrXIV:289370-289373	Scer_YNL186W.289370	1	0	0	0	0	1	1	1	0	1	YNL186W	Scer
Scer_chrXIV:289393-289396	Scer_YNL186W.289393	0	1	1	0	1	0	1	0	0	1	YNL186W	Scer
Scer_chrXIV:289474-289477	Scer_YNL186W.289474	0	1	1	0	0	1	0	1	0	1	YNL186W	Scer
Scer_chrXIV:284146-284149	Scer_YNL189W.284146	0	1	0	1	1	0	0	0	0	1	YNL189W	Scer
Scer_chrXIV:284206-284209	Scer_YNL189W.284206	0	1	1	0	1	0	0	1	0	1	YNL189W	Scer
Scer_chrXIV:282221-282224	Scer_YNL190W.282221	0	1	1	0	1	0	1	1	0	1	YNL190W	Scer
Scer_chrXIV:282294-282297	Scer_YNL190W.282294	0	1	0	1	0	1	1	1	0	1	YNL190W	Scer
Scer_chrXIV:282332-282335	Scer_YNL190W.282332	0	1	1	0	0	1	1	1	0	1	YNL190W	Scer
Scer_chrXIV:280398-280401	Scer_YNL191W.280398	1	0	0	0	1	0	0	0	0	1	YNL191W	Scer
Scer_chrXIV:269786-269789	Scer_YNL197C.269789	0	1	1	0	1	0	0	0	0	1	YNL197C	Scer
Scer_chrXIV:263263-263266	Scer_YNL201C.263266	0	1	1	0	0	1	1	1	0	1	YNL201C	Scer
Scer_chrXIV:263408-263411	Scer_YNL201C.263411	0	1	1	0	1	0	0	0	0	1	YNL201C	Scer
Scer_chrXIV:255293-255296	Scer_YNL207W.255293	0	1	1	0	1	0	1	0	0	1	YNL207W	Scer
Scer_chrXIV:250335-250338	Scer_YNL211C.250338	1	0	0	0	1	0	0	0	0	1	YNL211C	Scer
Scer_chrXIV:240296-240299	Scer_YNL217W.240296	1	0	0	0	1	0	0	0	1	0	YNL217W	Scer
Scer_chrXIV:220231-220234	Scer_YNL229C.220234	0	1	1	0	1	0	0	1	0	1	YNL229C	Scer
Scer_chrXIV:217119-217122	Scer_YNL231C.217122	0	1	1	0	1	0	0	0	0	1	YNL231C	Scer
Scer_chrXIV:181089-181092	Scer_YNL249C.181092	1	0	0	0	1	0	0	0	1	0	YNL249C	Scer
Scer_chrXIV:174364-174367	Scer_YNL251C.174367	0	1	0	1	1	0	0	0	0	1	YNL251C	Scer
Scer_chrXIV:174435-174438	Scer_YNL251C.174438	0	1	0	1	1	0	0	0	0	1	YNL251C	Scer
Scer_chrXIV:174532-174535	Scer_YNL251C.174535	0	1	0	1	1	0	0	1	0	1	YNL251C	Scer
Scer_chrXIV:90250-90253	Scer_YNL288W.90250	0	1	1	0	0	1	1	1	0	1	YNL288W	Scer
Scer_chrXIV:87834-87837	Scer_YNL289W.87834	0	1	1	0	1	0	0	0	0	1	YNL289W	Scer
Scer_chrXIV:85914-85917	Scer_YNL291C.85917	0	1	1	0	1	0	0	0	0	1	YNL291C	Scer
Scer_chrXIV:661612-661615	Scer_YNR016C.661615	0	1	1	0	1	0	0	1	0	1	YNR016C	Scer
Scer_chrXIV:661646-661649	Scer_YNR016C.661649	0	1	0	1	1	0	1	0	0	1	YNR016C	Scer
Scer_chrXIV:661734-661737	Scer_YNR016C.661737	0	1	0	1	1	0	1	1	0	1	YNR016C	Scer
Scer_chrXIV:661885-661888	Scer_YNR016C.661888	0	1	1	0	0	1	0	0	1	0	YNR016C	Scer
Scer_chrXIV:664222-664225	Scer_YNR018W.664222	0	1	1	0	1	0	0	0	1	0	YNR018W	Scer
Scer_chrXIV:703593-703596	Scer_YNR044W.703593	1	0	0	0	0	1	1	1	1	0	YNR044W	Scer
Scer_chrXIV:730398-730401	Scer_YNR055C.730401	1	0	0	0	0	1	1	1	0	1	YNR055C	Scer
Scer_chrXIV:730842-730845	Scer_YNR055C.730845	1	0	0	0	1	0	0	0	1	0	YNR055C	Scer
Scer_chrXIV:778793-778796	Scer_YNR074C.778796	0	1	1	0	1	0	0	0	0	1	YNR074C	Scer
Scer_chrXIV:779097-779100	Scer_YNR074C.779100	1	0	0	0	1	0	0	0	1	0	YNR074C	Scer
Scer_chrXV:324475-324478	Scer_YOL001W.324475	1	0	0	0	1	0	0	0	1	0	YOL001W	Scer
Scer_chrXV:324658-324661	Scer_YOL001W.324658	1	0	0	0	1	0	0	0	1	0	YOL001W	Scer
Scer_chrXV:324384-324387	Scer_YOL002C.324387	1	0	0	0	1	0	0	0	1	0	YOL002C	Scer
Scer_chrXV:304645-304648	Scer_YOL011W.304645	1	0	0	0	1	0	0	0	1	0	YOL011W	Scer
Scer_chrXV:304265-304268	Scer_YOL012C.304268	1	0	0	0	1	0	0	0	1	0	YOL012C	Scer
Scer_chrXV:299578-299581	Scer_YOL014W.299578	0	1	1	0	1	0	0	0	0	1	YOL014W	Scer
Scer_chrXV:299637-299640	Scer_YOL014W.299637	1	0	0	0	1	0	0	0	0	1	YOL014W	Scer
Scer_chrXV:292114-292117	Scer_YOL018C.292117	1	0	0	0	1	0	0	0	0	1	YOL018C	Scer
Scer_chrXV:271482-271485	Scer_YOL028C.271485	0	1	1	0	1	0	0	0	0	1	YOL028C	Scer
Scer_chrXV:265392-265395	Scer_YOL032W.265392	0	1	1	0	1	0	0	0	0	1	YOL032W	Scer
Scer_chrXV:256501-256504	Scer_YOL036W.256501	0	1	1	0	1	0	0	0	0	1	YOL036W	Scer
Scer_chrXV:255044-255047	Scer_YOL038C-A.255047	1	0	0	0	1	0	0	0	0	1	YOL038C-A	Scer
Scer_chrXV:255010-255013	Scer_YOL038W.255010	1	0	0	0	1	0	0	0	1	0	YOL038W	Scer
Scer_chrXV:170956-170959	Scer_YOL081W.170956	0	1	1	0	1	0	0	0	0	1	YOL081W	Scer
Scer_chrXV:168429-168432	Scer_YOL082W.168429	1	0	0	0	1	0	0	0	1	0	YOL082W	Scer
Scer_chrXV:168626-168629	Scer_YOL082W.168626	1	0	0	0	1	0	0	0	1	0	YOL082W	Scer
Scer_chrXV:158724-158727	Scer_YOL087C.158727	0	1	0	1	1	0	0	0	0	1	YOL087C	Scer
Scer_chrXV:129156-129159	Scer_YOL100W.129156	1	0	0	0	1	0	1	0	0	1	YOL100W	Scer
Scer_chrXV:123898-123901	Scer_YOL103W.123898	0	1	1	0	1	0	1	0	0	1	YOL103W	Scer
Scer_chrXV:115855-115858	Scer_YOL105C.115858	1	0	0	0	1	0	0	0	0	1	YOL105C	Scer
Scer_chrXV:110277-110280	Scer_YOL109W.110277	0	1	0	1	1	0	1	0	0	1	YOL109W	Scer
Scer_chrXV:106577-106580	Scer_YOL112W.106577	1	0	0	0	0	1	1	1	0	1	YOL112W	Scer
Scer_chrXV:96788-96791	Scer_YOL117W.96788	1	0	0	0	1	0	0	0	0	1	YOL117W	Scer
Scer_chrXV:87570-87573	Scer_YOL123W.87570	0	1	0	1	1	0	0	0	0	1	YOL123W	Scer
Scer_chrXV:87681-87684	Scer_YOL123W.87681	0	1	1	0	1	0	1	0	0	1	YOL123W	Scer
Scer_chrXV:87708-87711	Scer_YOL123W.87708	0	1	1	0	1	0	0	0	0	1	YOL123W	Scer
Scer_chrXV:87812-87815	Scer_YOL123W.87812	0	1	0	1	1	0	1	0	0	1	YOL123W	Scer
Scer_chrXV:83758-83761	Scer_YOL125W.83758	1	0	0	0	1	0	0	0	1	0	YOL125W	Scer
Scer_chrXV:83787-83790	Scer_YOL125W.83787	1	0	0	0	0	1	1	1	0	1	YOL125W	Scer
Scer_chrXV:74118-74121	Scer_YOL130W.74118	1	0	0	0	0	1	0	0	1	0	YOL130W	Scer
Scer_chrXV:74297-74300	Scer_YOL130W.74297	1	0	0	0	0	1	1	1	0	1	YOL130W	Scer
Scer_chrXV:65546-65549	Scer_YOL137W.65546	1	0	0	0	1	0	0	0	1	0	YOL137W	Scer
Scer_chrXV:17858-17861	Scer_YOL159C.17861	1	0	0	0	1	0	0	0	1	0	YOL159C	Scer
Scer_chrXV:17955-17958	Scer_YOL159C.17958	1	0	0	0	1	0	0	0	1	0	YOL159C	Scer
Scer_chrXV:18004-18007	Scer_YOL159C.18007	1	0	0	0	1	0	0	0	1	0	YOL159C	Scer
Scer_chrXV:342453-342456	Scer_YOR008C.342456	0	1	1	0	1	0	0	0	0	1	YOR008C	Scer
Scer_chrXV:348794-348797	Scer_YOR011W.348794	1	0	0	0	1	0	0	0	0	1	YOR011W	Scer
Scer_chrXV:386730-386733	Scer_YOR030W.386730	1	0	0	0	1	0	0	0	0	1	YOR030W	Scer
Scer_chrXV:394608-394611	Scer_YOR033C.394611	1	0	0	0	1	0	0	0	0	1	YOR033C	Scer
Scer_chrXV:410739-410742	Scer_YOR043W.410739	0	1	1	0	1	0	1	0	0	1	YOR043W	Scer
Scer_chrXV:410841-410844	Scer_YOR043W.410841	0	1	1	0	0	1	1	0	0	1	YOR043W	Scer
Scer_chrXV:423746-423749	Scer_YOR049C.423749	0	1	0	1	1	0	0	0	0	1	YOR049C	Scer
Scer_chrXV:423830-423833	Scer_YOR049C.423833	0	1	0	1	1	0	0	0	0	1	YOR049C	Scer
Scer_chrXV:427628-427631	Scer_YOR053W.427628	1	0	0	0	1	0	0	0	1	0	YOR053W	Scer
Scer_chrXV:427681-427684	Scer_YOR053W.427681	1	0	0	0	1	0	0	0	0	1	YOR053W	Scer
Scer_chrXV:432129-432132	Scer_YOR057W.432129	1	0	0	0	1	0	0	0	1	0	YOR057W	Scer
Scer_chrXV:441431-441434	Scer_YOR061W.441431	1	0	0	0	0	1	1	1	0	1	YOR061W	Scer
Scer_chrXV:441475-441478	Scer_YOR061W.441475	0	1	1	0	0	1	1	1	0	1	YOR061W	Scer
Scer_chrXV:444122-444125	Scer_YOR062C.444125	1	0	0	0	1	0	0	0	1	0	YOR062C	Scer
Scer_chrXV:479472-479475	Scer_YOR083W.479472	1	0	0	0	1	0	0	0	0	1	YOR083W	Scer
Scer_chrXV:492896-492899	Scer_YOR090C.492899	0	1	1	0	1	0	1	0	0	1	YOR090C	Scer
Scer_chrXV:492914-492917	Scer_YOR090C.492917	0	1	1	0	1	0	0	0	0	1	YOR090C	Scer
Scer_chrXV:502736-502739	Scer_YOR094W.502736	0	1	1	0	1	0	0	0	0	1	YOR094W	Scer
Scer_chrXV:522923-522926	Scer_YOR108W.522923	1	0	0	0	1	0	0	0	1	0	YOR108W	Scer
Scer_chrXV:544217-544220	Scer_YOR116C.544220	0	1	1	0	1	0	0	0	0	1	YOR116C	Scer
Scer_chrXV:545002-545005	Scer_YOR117W.545002	0	1	1	0	1	0	0	0	0	1	YOR117W	Scer
Scer_chrXV:546671-546674	Scer_YOR118W.546671	1	0	0	0	0	1	1	1	0	1	YOR118W	Scer
Scer_chrXV:546804-546807	Scer_YOR118W.546804	0	1	0	1	1	0	1	1	0	1	YOR118W	Scer
Scer_chrXV:570838-570841	Scer_YOR130C.570841	0	1	0	1	1	0	0	0	1	0	YOR130C	Scer
Scer_chrXV:580152-580155	Scer_YOR136W.580152	1	0	0	0	1	0	1	0	0	1	YOR136W	Scer
Scer_chrXV:592878-592881	Scer_YOR142W.592878	0	1	1	0	1	0	0	0	0	1	YOR142W	Scer
Scer_chrXV:611690-611693	Scer_YOR149C.611693	1	0	0	0	1	0	0	0	1	0	YOR149C	Scer
Scer_chrXV:618778-618781	Scer_YOR152C.618781	1	0	0	0	1	0	0	0	0	1	YOR152C	Scer
Scer_chrXV:619733-619736	Scer_YOR153W.619733	0	1	1	0	1	0	0	0	0	1	YOR153W	Scer
Scer_chrXV:619756-619759	Scer_YOR153W.619756	0	1	1	0	0	1	1	0	0	1	YOR153W	Scer
Scer_chrXV:638639-638642	Scer_YOR161C.638642	0	1	1	0	1	0	0	0	0	1	YOR161C	Scer
Scer_chrXV:642135-642138	Scer_YOR162C.642138	1	0	0	0	1	0	0	0	0	1	YOR162C	Scer
Scer_chrXV:642392-642395	Scer_YOR162C.642395	1	0	0	0	1	0	0	0	1	0	YOR162C	Scer
Scer_chrXV:675652-675655	Scer_YOR180C.675655	1	0	0	0	1	0	0	0	0	1	YOR180C	Scer
Scer_chrXV:682180-682183	Scer_YOR185C.682183	1	0	0	0	1	0	0	0	1	0	YOR185C	Scer
Scer_chrXV:720131-720134	Scer_YOR198C.720134	0	1	1	0	1	0	1	1	0	1	YOR198C	Scer
Scer_chrXV:755064-755067	Scer_YOR219C.755067	1	0	0	0	1	0	0	0	0	1	YOR219C	Scer
Scer_chrXV:757580-757583	Scer_YOR221C.757583	0	1	0	1	1	0	0	0	0	1	YOR221C	Scer
Scer_chrXV:757881-757884	Scer_YOR222W.757881	1	0	0	0	1	0	0	0	1	0	YOR222W	Scer
Scer_chrXV:770708-770711	Scer_YOR230W.770708	0	1	0	1	1	0	0	0	1	0	YOR230W	Scer
Scer_chrXV:770752-770755	Scer_YOR230W.770752	0	1	1	0	1	0	0	0	0	1	YOR230W	Scer
Scer_chrXV:772529-772532	Scer_YOR231W.772529	1	0	0	0	1	0	0	0	0	1	YOR231W	Scer
Scer_chrXV:774542-774545	Scer_YOR232W.774542	0	1	0	1	0	1	1	1	0	1	YOR232W	Scer
Scer_chrXV:775730-775733	Scer_YOR233W.775730	0	1	0	1	0	1	1	1	0	1	YOR233W	Scer
Scer_chrXV:797592-797595	Scer_YOR247W.797592	0	1	1	0	1	0	1	0	0	1	YOR247W	Scer
Scer_chrXV:816984-816987	Scer_YOR261C.816987	0	1	1	0	1	0	1	1	0	1	YOR261C	Scer
Scer_chrXV:824913-824916	Scer_YOR267C.824916	0	1	0	1	1	0	0	1	0	1	YOR267C	Scer
Scer_chrXV:830614-830617	Scer_YOR270C.830617	0	1	1	0	1	0	0	1	0	1	YOR270C	Scer
Scer_chrXV:830638-830641	Scer_YOR270C.830641	0	1	1	0	1	0	0	0	0	1	YOR270C	Scer
Scer_chrXV:832743-832746	Scer_YOR272W.832743	1	0	0	0	0	1	1	0	1	0	YOR272W	Scer
Scer_chrXV:882764-882767	Scer_YOR303W.882764	1	0	0	0	1	0	0	0	0	1	YOR303W	Scer
Scer_chrXV:891588-891591	Scer_YOR306C.891591	1	0	0	0	1	0	0	0	0	1	YOR306C	Scer
Scer_chrXV:894189-894192	Scer_YOR307C.894192	1	0	0	0	1	0	0	0	0	1	YOR307C	Scer
Scer_chrXV:925676-925679	Scer_YOR326W.925676	0	1	0	1	1	0	1	0	0	1	YOR326W	Scer
Scer_chrXV:967713-967716	Scer_YOR342C.967716	1	0	0	0	0	1	1	1	0	1	YOR342C	Scer
Scer_chrXV:981774-981777	Scer_YOR346W.981774	0	1	1	0	1	0	0	0	0	1	YOR346W	Scer
Scer_chrXV:1014862-1014865	Scer_YOR360C.1014865	0	1	1	0	1	0	0	1	0	1	YOR360C	Scer
Scer_chrXV:1031145-1031148	Scer_YOR370C.1031148	0	1	1	0	1	0	0	1	0	1	YOR370C	Scer
Scer_chrXV:1031188-1031191	Scer_YOR370C.1031191	0	1	0	1	1	0	0	0	0	1	YOR370C	Scer
Scer_chrXV:1031274-1031277	Scer_YOR370C.1031277	0	1	1	0	1	0	1	0	0	1	YOR370C	Scer
Scer_chrXV:1044745-1044748	Scer_YOR376W-A.1044745	1	0	0	0	1	0	0	0	0	1	YOR376W-A	Scer
Scer_chrXV:1059481-1059484	Scer_YOR382W.1059481	0	1	0	1	1	0	0	0	1	0	YOR382W	Scer
Scer_chrXV:1085158-1085161	Scer_YOR396W.1085158	0	1	0	1	1	0	0	0	0	1	YOR396W	Scer
Scer_chrXVI:551698-551701	Scer_YPL004C.551701	0	1	0	1	1	0	0	0	1	0	YPL004C	Scer
Scer_chrXVI:539239-539242	Scer_YPL008W.539239	1	0	0	0	1	0	0	0	0	1	YPL008W	Scer
Scer_chrXVI:520728-520731	Scer_YPL016W.520728	0	1	1	0	0	1	0	0	0	1	YPL016W	Scer
Scer_chrXVI:517035-517038	Scer_YPL019C.517038	0	1	1	0	1	0	0	0	0	1	YPL019C	Scer
Scer_chrXVI:506374-506377	Scer_YPL023C.506377	0	1	1	0	0	1	0	0	0	1	YPL023C	Scer
Scer_chrXVI:486410-486413	Scer_YPL034W.486410	1	0	0	0	1	0	1	1	0	1	YPL034W	Scer
Scer_chrXVI:486502-486505	Scer_YPL034W.486502	1	0	0	0	1	0	0	0	0	1	YPL034W	Scer
Scer_chrXVI:482505-482508	Scer_YPL036W.482505	1	0	0	0	1	0	0	0	0	1	YPL036W	Scer
Scer_chrXVI:467157-467160	Scer_YPL045W.467157	1	0	0	0	1	0	0	0	0	1	YPL045W	Scer
Scer_chrXVI:463874-463877	Scer_YPL049C.463877	0	1	1	0	1	0	1	0	0	1	YPL049C	Scer
Scer_chrXVI:458748-458751	Scer_YPL052W.458748	0	1	1	0	1	0	0	0	0	1	YPL052W	Scer
Scer_chrXVI:453198-453201	Scer_YPL057C.453201	1	0	0	0	0	1	0	0	1	0	YPL057C	Scer
Scer_chrXVI:425889-425892	Scer_YPL067C.425892	0	1	0	1	1	0	0	0	0	1	YPL067C	Scer
Scer_chrXVI:425158-425161	Scer_YPL068C.425161	1	0	0	0	1	0	0	0	1	0	YPL068C	Scer
Scer_chrXVI:410390-410393	Scer_YPL076W.410390	1	0	0	0	0	1	1	0	0	1	YPL076W	Scer
Scer_chrXVI:381711-381714	Scer_YPL088W.381711	1	0	0	0	1	0	0	0	0	1	YPL088W	Scer
Scer_chrXVI:381199-381202	Scer_YPL089C.381202	0	1	0	1	1	0	0	0	0	1	YPL089C	Scer
Scer_chrXVI:352297-352300	Scer_YPL106C.352300	0	1	1	0	1	0	0	0	0	1	YPL106C	Scer
Scer_chrXVI:344788-344791	Scer_YPL110C.344791	0	1	0	1	1	0	0	0	0	1	YPL110C	Scer
Scer_chrXVI:335746-335749	Scer_YPL115C.335749	1	0	0	0	1	0	0	0	1	0	YPL115C	Scer
Scer_chrXVI:313348-313351	Scer_YPL125W.313348	0	1	0	1	0	1	1	0	0	1	YPL125W	Scer
Scer_chrXVI:289167-289170	Scer_YPL140C.289170	1	0	0	0	0	1	1	1	0	1	YPL140C	Scer
Scer_chrXVI:279794-279797	Scer_YPL145C.279797	0	1	0	1	1	0	1	0	0	1	YPL145C	Scer
Scer_chrXVI:279866-279869	Scer_YPL145C.279869	0	1	1	0	0	1	1	1	0	1	YPL145C	Scer
Scer_chrXVI:277545-277548	Scer_YPL146C.277548	1	0	0	0	1	0	0	0	0	1	YPL146C	Scer
Scer_chrXVI:272856-272859	Scer_YPL148C.272859	1	0	0	0	0	1	1	0	0	1	YPL148C	Scer
Scer_chrXVI:260978-260981	Scer_YPL154C.260981	0	1	0	1	0	1	1	1	0	1	YPL154C	Scer
Scer_chrXVI:261039-261042	Scer_YPL154C.261042	0	1	0	1	1	0	0	0	0	1	YPL154C	Scer
Scer_chrXVI:254355-254358	Scer_YPL158C.254358	0	1	0	1	1	0	0	0	0	1	YPL158C	Scer
Scer_chrXVI:251727-251730	Scer_YPL159C.251730	0	1	0	1	1	0	0	0	0	1	YPL159C	Scer
Scer_chrXVI:246895-246898	Scer_YPL160W.246895	1	0	0	0	1	0	0	0	1	0	YPL160W	Scer
Scer_chrXVI:241525-241528	Scer_YPL164C.241528	1	0	0	0	0	1	1	1	0	1	YPL164C	Scer
Scer_chrXVI:214030-214033	Scer_YPL177C.214033	0	1	0	1	1	0	0	0	0	1	YPL177C	Scer
Scer_chrXVI:208128-208131	Scer_YPL179W.208128	0	1	1	0	0	1	1	1	0	1	YPL179W	Scer
Scer_chrXVI:187778-187781	Scer_YPL190C.187781	0	1	1	0	1	0	0	1	0	1	YPL190C	Scer
Scer_chrXVI:169418-169421	Scer_YPL202C.169421	0	1	0	1	1	0	0	0	1	0	YPL202C	Scer
Scer_chrXVI:150244-150247	Scer_YPL214C.150247	1	0	0	0	1	0	0	0	0	1	YPL214C	Scer
Scer_chrXVI:132856-132859	Scer_YPL221W.132856	0	1	1	0	0	1	1	1	1	0	YPL221W	Scer
Scer_chrXVI:133007-133010	Scer_YPL221W.133007	0	1	1	0	1	0	1	0	1	0	YPL221W	Scer
Scer_chrXVI:121254-121257	Scer_YPL227C.121257	1	0	0	0	0	1	1	1	0	1	YPL227C	Scer
Scer_chrXVI:121389-121392	Scer_YPL227C.121392	1	0	0	0	1	0	0	0	1	0	YPL227C	Scer
Scer_chrXVI:118312-118315	Scer_YPL228W.118312	0	1	1	0	1	0	0	0	0	1	YPL228W	Scer
Scer_chrXVI:105888-105891	Scer_YPL234C.105891	1	0	0	0	1	0	0	0	1	0	YPL234C	Scer
Scer_chrXVI:103203-103206	Scer_YPL235W.103203	0	1	1	0	0	1	1	0	0	1	YPL235W	Scer
Scer_chrXVI:102854-102857	Scer_YPL236C.102857	1	0	0	0	1	0	0	0	1	0	YPL236C	Scer
Scer_chrXVI:99413-99416	Scer_YPL239W.99413	0	1	1	0	0	1	1	0	0	1	YPL239W	Scer
Scer_chrXVI:88459-88462	Scer_YPL243W.88459	0	1	0	1	1	0	0	0	0	1	YPL243W	Scer
Scer_chrXVI:49268-49271	Scer_YPL260W.49268	0	1	1	0	0	1	1	1	0	1	YPL260W	Scer
Scer_chrXVI:41007-41010	Scer_YPL265W.41007	0	1	0	1	0	1	0	0	0	1	YPL265W	Scer
Scer_chrXVI:572967-572970	Scer_YPR008W.572967	0	1	1	0	1	0	0	0	0	1	YPR008W	Scer
Scer_chrXVI:585701-585704	Scer_YPR013C.585704	1	0	0	0	0	1	1	1	0	1	YPR013C	Scer
Scer_chrXVI:593107-593110	Scer_YPR016C.593110	0	1	1	0	0	1	0	0	0	1	YPR016C	Scer
Scer_chrXVI:593150-593153	Scer_YPR016C.593153	0	1	1	0	0	1	1	1	0	1	YPR016C	Scer
Scer_chrXVI:594426-594429	Scer_YPR018W.594426	1	0	0	0	1	0	0	0	0	1	YPR018W	Scer
Scer_chrXVI:603395-603398	Scer_YPR021C.603398	1	0	0	0	1	0	0	1	0	1	YPR021C	Scer
Scer_chrXVI:603544-603547	Scer_YPR021C.603547	1	0	0	0	1	0	0	0	0	1	YPR021C	Scer
Scer_chrXVI:610375-610378	Scer_YPR024W.610375	0	1	1	0	0	1	1	0	0	1	YPR024W	Scer
Scer_chrXVI:623100-623103	Scer_YPR028W.623100	1	0	0	0	1	0	0	0	1	0	YPR028W	Scer
Scer_chrXVI:642175-642178	Scer_YPR035W.642175	0	1	0	1	1	0	0	0	0	1	YPR035W	Scer
Scer_chrXVI:645906-645909	Scer_YPR036W-A.645906	0	1	0	1	0	1	1	0	0	1	YPR036W-A	Scer
Scer_chrXVI:646260-646263	Scer_YPR038W.646260	0	1	1	0	1	0	0	0	0	1	YPR038W	Scer
Scer_chrXVI:682195-682198	Scer_YPR067W.682195	1	0	0	0	1	0	0	0	0	1	YPR067W	Scer
Scer_chrXVI:685799-685802	Scer_YPR070W.685799	1	0	0	0	1	0	0	0	1	0	YPR070W	Scer
Scer_chrXVI:690083-690086	Scer_YPR072W.690083	1	0	0	0	0	1	1	1	0	1	YPR072W	Scer
Scer_chrXVI:709869-709872	Scer_YPR085C.709872	1	0	0	0	1	0	0	1	0	1	YPR085C	Scer
Scer_chrXVI:732298-732301	Scer_YPR103W.732298	0	1	1	0	0	1	1	1	0	1	YPR103W	Scer
Scer_chrXVI:742402-742405	Scer_YPR108W.742402	0	1	0	1	1	0	0	1	0	1	YPR108W	Scer
Scer_chrXVI:744662-744665	Scer_YPR109W.744662	1	0	0	0	1	0	0	0	0	1	YPR109W	Scer
Scer_chrXVI:786044-786047	Scer_YPR124W.786044	0	1	0	1	1	0	0	0	0	1	YPR124W	Scer
Scer_chrXVI:786154-786157	Scer_YPR124W.786154	0	1	1	0	1	0	0	0	0	1	YPR124W	Scer
Scer_chrXVI:786184-786187	Scer_YPR124W.786184	0	1	0	1	1	0	0	1	0	1	YPR124W	Scer
Scer_chrXVI:787890-787893	Scer_YPR125W.787890	0	1	1	0	1	0	0	0	0	1	YPR125W	Scer
Scer_chrXVI:790015-790018	Scer_YPR127W.790015	1	0	0	0	1	0	0	0	1	0	YPR127W	Scer
Scer_chrXVI:821457-821460	Scer_YPR144C.821460	1	0	0	0	1	0	0	0	1	0	YPR144C	Scer
Scer_chrXVI:829852-829855	Scer_YPR149W.829852	0	1	0	1	1	0	0	0	0	1	YPR149W	Scer
Scer_chrXVI:829891-829894	Scer_YPR149W.829891	0	1	0	1	0	1	1	0	0	1	YPR149W	Scer
Scer_chrXVI:839901-839904	Scer_YPR156C.839904	0	1	1	0	0	1	1	1	0	1	YPR156C	Scer
Scer_chrXVI:840959-840962	Scer_YPR157W.840959	1	0	0	0	1	0	0	0	1	0	YPR157W	Scer
Scer_chrXVI:857444-857447	Scer_YPR159W.857444	0	1	0	1	1	0	0	1	0	1	YPR159W	Scer
Scer_chrXVI:875304-875307	Scer_YPR165W.875304	0	1	0	1	0	1	1	1	0	1	YPR165W	Scer
Scer_chrXVI:877686-877689	Scer_YPR167C.877689	1	0	0	0	1	0	0	0	1	0	YPR167C	Scer
Scer_chrXVI:907172-907175	Scer_YPR185W.907172	0	1	1	0	1	0	0	0	0	1	YPR185W	Scer
Scer_chrXVI:927130-927133	Scer_YPR194C.927133	1	0	0	0	1	0	0	0	0	1	YPR194C	Scer
Scer_chrXVI:927241-927244	Scer_YPR194C.927244	1	0	0	0	1	0	0	0	0	1	YPR194C	Scer
Spar_Spar_1:118508-118511	Spar_YAL002W.118508	0	1	0	1	1	0	0	0	0	1	YAL002W	Spar
Spar_Spar_1:117405-117408	Spar_YAL003W.117405	0	1	0	1	1	0	0	0	1	0	YAL003W	Spar
Spar_Spar_1:105878-105881	Spar_YAL012W.105878	0	1	0	1	1	0	0	0	0	1	YAL012W	Spar
Spar_Spar_1:100015-100018	Spar_YAL016W.100015	0	1	1	0	1	0	0	0	0	1	YAL016W	Spar
Spar_Spar_1:99945-99948	Spar_YAL016W.99945	0	1	0	1	1	0	0	0	1	0	YAL016W	Spar
Spar_Spar_1:83810-83813	Spar_YAL023C.83813	0	1	0	1	0	1	1	0	0	1	YAL023C	Spar
Spar_Spar_1:67590-67593	Spar_YAL029C.67593	0	1	1	0	0	1	1	1	0	1	YAL029C	Spar
Spar_Spar_1:51437-51440	Spar_YAL036C.51440	0	1	0	1	1	0	0	0	0	1	YAL036C	Spar
Spar_Spar_1:42884-42887	Spar_YAL040C.42887	0	1	1	0	1	0	0	0	0	1	YAL040C	Spar
Spar_Spar_1:42960-42963	Spar_YAL040C.42963	0	1	0	1	1	0	0	0	0	1	YAL040C	Spar
Spar_Spar_1:43179-43182	Spar_YAL040C.43182	1	0	0	0	1	0	0	0	0	1	YAL040C	Spar
Spar_Spar_1:21265-21268	Spar_YAL053W.21265	0	1	1	0	1	0	1	1	0	1	YAL053W	Spar
Spar_Spar_1:138330-138333	Spar_YAR014C.138333	0	1	0	1	1	0	0	0	0	1	YAR014C	Spar
Spar_Spar_1:138726-138729	Spar_YAR015W.138726	0	1	0	1	1	0	0	0	1	0	YAR015W	Spar
Spar_Spar_1:138760-138763	Spar_YAR015W.138760	0	1	0	1	0	1	0	1	0	1	YAR015W	Spar
Spar_Spar_8:526628-526631	Spar_YAR066W.526628	0	1	0	1	1	0	0	0	0	1	YAR066W	Spar
Spar_Spar_8:527564-527567	Spar_YAR068W.527564	0	1	0	1	1	0	0	1	1	0	YAR068W	Spar
Spar_Spar_8:527619-527622	Spar_YAR068W.527619	0	1	0	1	1	0	0	0	1	0	YAR068W	Spar
Spar_Spar_8:527759-527762	Spar_YAR068W.527759	0	1	0	1	1	0	0	0	0	1	YAR068W	Spar
Spar_Spar_8:527844-527847	Spar_YAR068W.527844	0	1	0	1	1	0	0	0	0	1	YAR068W	Spar
Spar_Spar_8:527891-527894	Spar_YAR068W.527891	0	1	0	1	1	0	0	0	0	1	YAR068W	Spar
Spar_Spar_2:144227-144230	Spar_YBL030C.144230	0	1	0	1	1	0	0	0	0	1	YBL030C	Spar
Spar_Spar_2:144237-144240	Spar_YBL030C.144240	0	1	0	1	1	0	1	0	0	1	YBL030C	Spar
Spar_Spar_2:130748-130751	Spar_YBL045C.130751	0	1	1	0	0	1	1	1	0	1	YBL045C	Spar
Spar_Spar_2:130812-130815	Spar_YBL045C.130815	0	1	1	0	1	0	1	0	0	1	YBL045C	Spar
Spar_Spar_2:130854-130857	Spar_YBL045C.130857	0	1	0	1	1	0	0	0	0	1	YBL045C	Spar
Spar_Spar_2:91177-91180	Spar_YBL067C.91180	0	1	1	0	1	0	0	0	0	1	YBL067C	Spar
Spar_Spar_2:66922-66925	Spar_YBL081W.66922	0	1	0	1	1	0	0	0	0	1	YBL081W	Spar
Spar_Spar_2:67062-67065	Spar_YBL081W.67062	0	1	1	0	1	0	0	0	0	1	YBL081W	Spar
Spar_Spar_2:59079-59082	Spar_YBL085W.59079	0	1	0	1	1	0	0	0	0	1	YBL085W	Spar
Spar_Spar_2:54770-54773	Spar_YBL088C.54773	0	1	1	0	1	0	0	0	0	1	YBL088C	Spar
Spar_Spar_2:55081-55084	Spar_YBL088C.55084	0	1	0	1	1	0	0	0	0	1	YBL088C	Spar
Spar_Spar_2:55100-55103	Spar_YBL088C.55103	0	1	0	1	1	0	0	0	0	1	YBL088C	Spar
Spar_Spar_2:55194-55197	Spar_YBL088C.55197	0	1	0	1	1	0	0	0	0	1	YBL088C	Spar
Spar_Spar_2:55326-55329	Spar_YBL088C.55329	0	1	0	1	1	0	0	0	1	0	YBL088C	Spar
Spar_Spar_2:55418-55421	Spar_YBL088C.55421	0	1	0	1	1	0	0	0	1	0	YBL088C	Spar
Spar_Spar_2:55431-55434	Spar_YBL088C.55434	0	1	0	1	1	0	0	0	1	0	YBL088C	Spar
Spar_Spar_2:40902-40905	Spar_YBL092W.40902	1	0	0	0	0	1	0	1	0	1	YBL092W	Spar
Spar_Spar_2:40931-40934	Spar_YBL092W.40931	1	0	0	0	1	0	0	0	0	1	YBL092W	Spar
Spar_Spar_2:40946-40949	Spar_YBL092W.40946	1	0	0	0	1	0	0	0	0	1	YBL092W	Spar
Spar_Spar_2:40971-40974	Spar_YBL092W.40971	0	1	1	0	1	0	0	1	0	1	YBL092W	Spar
Spar_Spar_2:41185-41188	Spar_YBL092W.41185	0	1	0	1	1	0	0	0	0	1	YBL092W	Spar
Spar_Spar_2:40215-40218	Spar_YBL093C.40218	0	1	1	0	1	0	0	0	0	1	YBL093C	Spar
Spar_Spar_2:32119-32122	Spar_YBL099W.32119	0	1	1	0	0	1	1	1	0	1	YBL099W	Spar
Spar_Spar_2:32184-32187	Spar_YBL099W.32184	0	1	0	1	1	0	1	0	0	1	YBL099W	Spar
Spar_Spar_2:32251-32254	Spar_YBL099W.32251	0	1	0	1	1	0	0	0	0	1	YBL099W	Spar
Spar_Spar_2:32284-32287	Spar_YBL099W.32284	0	1	0	1	1	0	1	0	0	1	YBL099W	Spar
Spar_Spar_2:25433-25436	Spar_YBL103C.25436	0	1	0	1	1	0	0	0	0	1	YBL103C	Spar
Spar_Spar_2:25532-25535	Spar_YBL103C.25535	0	1	0	1	1	0	0	0	0	1	YBL103C	Spar
Spar_Spar_2:19525-19528	Spar_YBL105C.19528	0	1	0	1	1	0	0	0	0	1	YBL105C	Spar
Spar_Spar_2:231540-231543	Spar_YBR008C.231543	0	1	0	1	1	0	0	0	0	1	YBR008C	Spar
Spar_Spar_2:232177-232180	Spar_YBR008C.232180	1	0	0	0	0	1	0	0	1	0	YBR008C	Spar
Spar_Spar_2:259703-259706	Spar_YBR023C.259706	0	1	0	1	1	0	0	0	0	1	YBR023C	Spar
Spar_Spar_2:263747-263750	Spar_YBR025C.263750	0	1	1	0	1	0	0	0	1	0	YBR025C	Spar
Spar_Spar_2:295765-295768	Spar_YBR043C.295768	0	1	0	1	0	1	1	1	0	1	YBR043C	Spar
Spar_Spar_2:352871-352874	Spar_YBR071W.352871	0	1	0	1	1	0	0	0	0	1	YBR071W	Spar
Spar_Spar_2:365429-365432	Spar_YBR078W.365429	0	1	0	1	1	0	0	0	0	1	YBR078W	Spar
Spar_Spar_2:365459-365462	Spar_YBR078W.365459	0	1	1	0	1	0	0	0	0	1	YBR078W	Spar
Spar_Spar_2:379595-379598	Spar_YBR082C.379598	0	1	1	0	1	0	0	0	0	1	YBR082C	Spar
Spar_Spar_2:395367-395370	Spar_YBR086C.395370	0	1	0	1	1	0	0	0	0	1	YBR086C	Spar
Spar_Spar_2:395554-395557	Spar_YBR086C.395557	0	1	0	1	1	0	0	0	0	1	YBR086C	Spar
Spar_Spar_2:421990-421993	Spar_YBR104W.421990	0	1	1	0	1	0	0	0	0	1	YBR104W	Spar
Spar_Spar_2:424996-424999	Spar_YBR106W.424996	0	1	0	1	1	0	0	0	0	1	YBR106W	Spar
Spar_Spar_2:455978-455981	Spar_YBR121C.455981	0	1	0	1	0	1	0	1	0	1	YBR121C	Spar
Spar_Spar_2:456002-456005	Spar_YBR121C.456005	0	1	0	1	0	1	1	1	0	1	YBR121C	Spar
Spar_Spar_2:456029-456032	Spar_YBR121C.456032	0	1	0	1	0	1	0	1	0	1	YBR121C	Spar
Spar_Spar_2:456068-456071	Spar_YBR121C.456071	0	1	1	0	1	0	0	0	1	0	YBR121C	Spar
Spar_Spar_2:461060-461063	Spar_YBR125C.461063	0	1	1	0	1	0	0	0	0	1	YBR125C	Spar
Spar_Spar_2:461153-461156	Spar_YBR125C.461156	0	1	1	0	1	0	0	0	0	1	YBR125C	Spar
Spar_Spar_2:461175-461178	Spar_YBR125C.461178	0	1	1	0	1	0	0	0	0	1	YBR125C	Spar
Spar_Spar_2:499401-499404	Spar_YBR140C.499404	0	1	1	0	0	1	1	1	0	1	YBR140C	Spar
Spar_Spar_2:521561-521564	Spar_YBR154C.521564	0	1	0	1	1	0	0	0	0	1	YBR154C	Spar
Spar_Spar_2:528913-528916	Spar_YBR158W.528913	1	0	0	0	0	1	1	1	0	1	YBR158W	Spar
Spar_Spar_2:532616-532619	Spar_YBR160W.532616	0	1	0	1	1	0	0	0	0	1	YBR160W	Spar
Spar_Spar_2:532661-532664	Spar_YBR160W.532661	0	1	0	1	1	0	0	0	0	1	YBR160W	Spar
Spar_Spar_2:532683-532686	Spar_YBR160W.532683	0	1	0	1	0	1	1	0	0	1	YBR160W	Spar
Spar_Spar_2:537328-537331	Spar_YBR162C.537331	0	1	0	1	1	0	0	0	0	1	YBR162C	Spar
Spar_Spar_2:541179-541182	Spar_YBR164C.541182	0	1	0	1	1	0	0	0	0	1	YBR164C	Spar
Spar_Spar_2:541201-541204	Spar_YBR164C.541204	0	1	0	1	1	0	0	0	0	1	YBR164C	Spar
Spar_Spar_2:554169-554172	Spar_YBR172C.554172	0	1	1	0	1	0	0	0	0	1	YBR172C	Spar
Spar_Spar_2:579728-579731	Spar_YBR187W.579728	1	0	0	0	0	1	1	1	1	0	YBR187W	Spar
Spar_Spar_2:579821-579824	Spar_YBR187W.579821	0	1	0	1	1	0	0	0	0	1	YBR187W	Spar
Spar_Spar_2:584888-584891	Spar_YBR192W.584888	0	1	1	0	1	0	0	0	0	1	YBR192W	Spar
Spar_Spar_2:591240-591243	Spar_YBR196C.591243	0	1	0	1	1	0	1	0	1	0	YBR196C	Spar
Spar_Spar_2:598730-598733	Spar_YBR200W.598730	0	1	1	0	1	0	0	0	0	1	YBR200W	Spar
Spar_Spar_2:626268-626271	Spar_YBR212W.626268	0	1	1	0	1	0	0	0	0	1	YBR212W	Spar
Spar_Spar_2:626448-626451	Spar_YBR212W.626448	0	1	0	1	1	0	0	0	0	1	YBR212W	Spar
Spar_Spar_2:626619-626622	Spar_YBR212W.626619	0	1	0	1	0	1	0	1	0	1	YBR212W	Spar
Spar_Spar_2:642272-642275	Spar_YBR218C.642275	0	1	0	1	1	0	0	0	0	1	YBR218C	Spar
Spar_Spar_2:642304-642307	Spar_YBR218C.642307	0	1	1	0	1	0	0	0	0	1	YBR218C	Spar
Spar_Spar_2:646291-646294	Spar_YBR221C.646294	0	1	0	1	0	1	1	1	0	1	YBR221C	Spar
Spar_Spar_2:646397-646400	Spar_YBR221C.646400	0	1	1	0	0	1	1	1	0	1	YBR221C	Spar
Spar_Spar_2:646438-646441	Spar_YBR221C.646441	0	1	0	1	1	0	1	0	0	1	YBR221C	Spar
Spar_Spar_2:663397-663400	Spar_YBR233W.663397	0	1	0	1	1	0	0	0	0	1	YBR233W	Spar
Spar_Spar_2:684473-684476	Spar_YBR242W.684473	1	0	0	0	0	1	1	0	1	0	YBR242W	Spar
Spar_Spar_2:684541-684544	Spar_YBR242W.684541	1	0	0	0	0	1	1	0	0	1	YBR242W	Spar
Spar_Spar_2:684617-684620	Spar_YBR242W.684617	0	1	0	1	1	0	0	0	0	1	YBR242W	Spar
Spar_Spar_2:697993-697996	Spar_YBR249C.697996	0	1	0	1	0	1	1	1	0	1	YBR249C	Spar
Spar_Spar_2:724507-724510	Spar_YBR270C.724510	1	0	0	0	0	1	0	1	0	1	YBR270C	Spar
Spar_Spar_2:750343-750346	Spar_YBR283C.750346	0	1	0	1	1	0	0	1	0	1	YBR283C	Spar
Spar_Spar_2:750447-750450	Spar_YBR283C.750450	0	1	0	1	1	0	0	0	1	0	YBR283C	Spar
Spar_Spar_3:75738-75741	Spar_YCL017C.75741	0	1	0	1	1	0	0	0	0	1	YCL017C	Spar
Spar_Spar_3:104381-104384	Spar_YCR005C.104384	0	1	1	0	1	0	0	0	0	1	YCR005C	Spar
Spar_Spar_3:111038-111041	Spar_YCR008W.111038	0	1	0	1	1	0	0	0	0	1	YCR008W	Spar
Spar_Spar_3:111166-111169	Spar_YCR008W.111166	0	1	0	1	1	0	0	0	0	1	YCR008W	Spar
Spar_Spar_3:111201-111204	Spar_YCR008W.111201	0	1	0	1	1	0	0	0	0	1	YCR008W	Spar
Spar_Spar_3:111345-111348	Spar_YCR008W.111345	0	1	1	0	1	0	0	0	0	1	YCR008W	Spar
Spar_Spar_3:111395-111398	Spar_YCR008W.111395	0	1	1	0	1	0	0	0	0	1	YCR008W	Spar
Spar_Spar_3:119879-119882	Spar_YCR011C.119882	0	1	1	0	0	1	0	1	0	1	YCR011C	Spar
Spar_Spar_3:120692-120695	Spar_YCR012W.120692	0	1	0	1	0	1	1	1	0	1	YCR012W	Spar
Spar_Spar_3:146768-146771	Spar_YCR024C-A.146771	0	1	1	0	0	1	0	1	0	1	YCR024C-A	Spar
Spar_Spar_3:146895-146898	Spar_YCR024C-A.146898	0	1	0	1	1	0	0	0	1	0	YCR024C-A	Spar
Spar_Spar_3:151716-151719	Spar_YCR027C.151719	0	1	1	0	0	1	1	1	0	1	YCR027C	Spar
Spar_Spar_3:151743-151746	Spar_YCR027C.151746	0	1	0	1	1	0	0	0	0	1	YCR027C	Spar
Spar_Spar_3:151782-151785	Spar_YCR027C.151785	0	1	0	1	1	0	0	0	0	1	YCR027C	Spar
Spar_Spar_3:191813-191816	Spar_YCR045W-A.191813	0	1	1	0	0	1	1	1	0	1	YCR045W-A	Spar
Spar_Spar_3:220604-220607	Spar_YCR067C.220607	0	1	0	1	1	0	0	0	0	1	YCR067C	Spar
Spar_Spar_3:220977-220980	Spar_YCR068W.220977	1	0	0	0	1	0	0	0	1	0	YCR068W	Spar
Spar_Spar_3:221017-221020	Spar_YCR068W.221017	1	0	0	0	1	0	0	0	0	1	YCR068W	Spar
Spar_Spar_3:246856-246859	Spar_YCR084C.246859	0	1	0	1	0	1	1	1	0	1	YCR084C	Spar
Spar_Spar_3:246921-246924	Spar_YCR084C.246924	0	1	1	0	1	0	0	0	0	1	YCR084C	Spar
Spar_Spar_4:452626-452629	Spar_YDL003W.452626	0	1	1	0	0	1	0	0	0	1	YDL003W	Spar
Spar_Spar_4:447624-447627	Spar_YDL006W.447624	0	1	0	1	1	0	0	0	0	1	YDL006W	Spar
Spar_Spar_4:447779-447782	Spar_YDL006W.447779	0	1	0	1	1	0	0	0	0	1	YDL006W	Spar
Spar_Spar_4:447830-447833	Spar_YDL006W.447830	0	1	0	1	1	0	0	0	0	1	YDL006W	Spar
Spar_Spar_4:447864-447867	Spar_YDL006W.447864	0	1	0	1	1	0	0	1	0	1	YDL006W	Spar
Spar_Spar_4:447903-447906	Spar_YDL006W.447903	0	1	0	1	0	1	1	0	0	1	YDL006W	Spar
Spar_Spar_4:435852-435855	Spar_YDL014W.435852	0	1	1	0	1	0	0	0	1	0	YDL014W	Spar
Spar_Spar_4:435940-435943	Spar_YDL014W.435940	0	1	0	1	1	0	0	0	0	1	YDL014W	Spar
Spar_Spar_4:435592-435595	Spar_YDL015C.435595	0	1	0	1	1	0	0	0	0	1	YDL015C	Spar
Spar_Spar_4:430119-430122	Spar_YDL019C.430122	0	1	0	1	1	0	0	0	0	1	YDL019C	Spar
Spar_Spar_4:430162-430165	Spar_YDL019C.430165	0	1	0	1	1	0	0	0	0	1	YDL019C	Spar
Spar_Spar_4:430203-430206	Spar_YDL019C.430206	0	1	0	1	1	0	0	0	0	1	YDL019C	Spar
Spar_Spar_4:425309-425312	Spar_YDL020C.425312	0	1	1	0	0	1	1	1	0	1	YDL020C	Spar
Spar_Spar_4:425334-425337	Spar_YDL020C.425337	0	1	0	1	1	0	0	0	0	1	YDL020C	Spar
Spar_Spar_4:411999-412002	Spar_YDL028C.412002	1	0	0	0	0	1	1	1	0	1	YDL028C	Spar
Spar_Spar_4:412055-412058	Spar_YDL028C.412058	0	1	1	0	0	1	1	0	0	1	YDL028C	Spar
Spar_Spar_4:412082-412085	Spar_YDL028C.412085	0	1	0	1	1	0	0	0	0	1	YDL028C	Spar
Spar_Spar_4:388775-388778	Spar_YDL039C.388778	0	1	0	1	1	0	0	0	0	1	YDL039C	Spar
Spar_Spar_4:388969-388972	Spar_YDL039C.388972	1	0	0	0	1	0	0	0	0	1	YDL039C	Spar
Spar_Spar_4:388987-388990	Spar_YDL039C.388990	1	0	0	0	1	0	0	0	0	1	YDL039C	Spar
Spar_Spar_4:389365-389368	Spar_YDL039C.389368	0	1	0	1	1	0	0	0	1	0	YDL039C	Spar
Spar_Spar_4:389487-389490	Spar_YDL039C.389490	0	1	0	1	1	0	0	0	1	0	YDL039C	Spar
Spar_Spar_4:389617-389620	Spar_YDL039C.389620	0	1	0	1	1	0	0	0	1	0	YDL039C	Spar
Spar_Spar_4:374731-374734	Spar_YDL047W.374731	1	0	0	0	1	0	0	0	1	0	YDL047W	Spar
Spar_Spar_4:374908-374911	Spar_YDL047W.374908	0	1	0	1	1	0	1	0	0	1	YDL047W	Spar
Spar_Spar_4:367580-367583	Spar_YDL053C.367583	0	1	0	1	1	0	0	0	0	1	YDL053C	Spar
Spar_Spar_4:361729-361732	Spar_YDL055C.361732	0	1	0	1	0	1	0	0	0	1	YDL055C	Spar
Spar_Spar_4:361768-361771	Spar_YDL055C.361771	0	1	0	1	1	0	0	0	0	1	YDL055C	Spar
Spar_Spar_4:361802-361805	Spar_YDL055C.361805	0	1	0	1	1	0	0	0	0	1	YDL055C	Spar
Spar_Spar_4:361839-361842	Spar_YDL055C.361842	0	1	0	1	1	0	0	0	0	1	YDL055C	Spar
Spar_Spar_4:345898-345901	Spar_YDL061C.345901	1	0	0	0	1	0	0	0	0	1	YDL061C	Spar
Spar_Spar_4:345947-345950	Spar_YDL061C.345950	0	1	0	1	1	0	1	1	0	1	YDL061C	Spar
Spar_Spar_4:345968-345971	Spar_YDL061C.345971	0	1	1	0	1	0	1	0	0	1	YDL061C	Spar
Spar_Spar_4:346035-346038	Spar_YDL061C.346038	1	0	0	0	1	0	0	0	0	1	YDL061C	Spar
Spar_Spar_4:346112-346115	Spar_YDL061C.346115	0	1	1	0	1	0	0	0	0	1	YDL061C	Spar
Spar_Spar_4:327047-327050	Spar_YDL075W.327047	0	1	0	1	1	0	0	0	1	0	YDL075W	Spar
Spar_Spar_4:325028-325031	Spar_YDL077C.325031	0	1	0	1	1	0	0	0	0	1	YDL077C	Spar
Spar_Spar_4:315001-315004	Spar_YDL081C.315004	0	1	0	1	1	0	0	0	0	1	YDL081C	Spar
Spar_Spar_4:315026-315029	Spar_YDL081C.315029	0	1	1	0	0	1	1	1	0	1	YDL081C	Spar
Spar_Spar_4:309947-309950	Spar_YDL084W.309947	0	1	0	1	1	0	0	0	0	1	YDL084W	Spar
Spar_Spar_4:309988-309991	Spar_YDL084W.309988	0	1	0	1	1	0	0	0	0	1	YDL084W	Spar
Spar_Spar_4:310033-310036	Spar_YDL084W.310033	0	1	1	0	0	1	1	1	0	1	YDL084W	Spar
Spar_Spar_4:253217-253220	Spar_YDL117W.253217	0	1	1	0	1	0	0	0	0	1	YDL117W	Spar
Spar_Spar_4:253283-253286	Spar_YDL117W.253283	0	1	1	0	1	0	0	0	0	1	YDL117W	Spar
Spar_Spar_4:253341-253344	Spar_YDL117W.253341	0	1	0	1	1	0	0	0	0	1	YDL117W	Spar
Spar_Spar_4:253435-253438	Spar_YDL117W.253435	0	1	0	1	1	0	1	0	0	1	YDL117W	Spar
Spar_Spar_4:247350-247353	Spar_YDL122W.247350	0	1	0	1	1	0	0	0	0	1	YDL122W	Spar
Spar_Spar_4:247380-247383	Spar_YDL122W.247380	0	1	1	0	1	0	0	0	0	1	YDL122W	Spar
Spar_Spar_4:234710-234713	Spar_YDL130W.234710	0	1	0	1	1	0	0	0	1	0	YDL130W	Spar
Spar_Spar_4:229086-229089	Spar_YDL132W.229086	0	1	1	0	0	1	1	1	0	1	YDL132W	Spar
Spar_Spar_4:229145-229148	Spar_YDL132W.229145	0	1	0	1	1	0	1	0	0	1	YDL132W	Spar
Spar_Spar_4:225702-225705	Spar_YDL134C.225705	0	1	0	1	1	0	1	1	0	1	YDL134C	Spar
Spar_Spar_4:225722-225725	Spar_YDL134C.225725	0	1	1	0	1	0	0	1	0	1	YDL134C	Spar
Spar_Spar_4:225808-225811	Spar_YDL134C.225811	0	1	0	1	1	0	1	1	0	1	YDL134C	Spar
Spar_Spar_4:225886-225889	Spar_YDL134C.225889	0	1	1	0	1	0	0	0	0	1	YDL134C	Spar
Spar_Spar_4:225929-225932	Spar_YDL134C.225932	0	1	0	1	1	0	0	0	0	1	YDL134C	Spar
Spar_Spar_4:225989-225992	Spar_YDL134C.225992	0	1	1	0	1	0	0	1	0	1	YDL134C	Spar
Spar_Spar_4:226161-226164	Spar_YDL134C.226164	0	1	1	0	0	1	1	0	0	1	YDL134C	Spar
Spar_Spar_4:226526-226529	Spar_YDL134C.226529	0	1	0	1	1	0	1	1	0	1	YDL134C	Spar
Spar_Spar_4:226557-226560	Spar_YDL134C.226560	0	1	0	1	0	1	1	1	1	0	YDL134C	Spar
Spar_Spar_4:226567-226570	Spar_YDL134C.226570	0	1	0	1	1	0	0	0	1	0	YDL134C	Spar
Spar_Spar_4:220980-220983	Spar_YDL137W.220980	0	1	1	0	1	0	0	0	0	1	YDL137W	Spar
Spar_Spar_4:218135-218138	Spar_YDL138W.218135	0	1	1	0	1	0	0	1	0	1	YDL138W	Spar
Spar_Spar_4:215471-215474	Spar_YDL140C.215474	0	1	0	1	1	0	1	0	0	1	YDL140C	Spar
Spar_Spar_4:215512-215515	Spar_YDL140C.215515	0	1	0	1	0	1	1	1	0	1	YDL140C	Spar
Spar_Spar_4:215639-215642	Spar_YDL140C.215642	0	1	1	0	1	0	1	0	0	1	YDL140C	Spar
Spar_Spar_4:215669-215672	Spar_YDL140C.215672	0	1	0	1	1	0	0	0	0	1	YDL140C	Spar
Spar_Spar_4:215742-215745	Spar_YDL140C.215745	0	1	0	1	1	0	0	0	0	1	YDL140C	Spar
Spar_Spar_4:215838-215841	Spar_YDL140C.215841	0	1	1	0	1	0	0	0	0	1	YDL140C	Spar
Spar_Spar_4:215913-215916	Spar_YDL140C.215916	0	1	1	0	1	0	0	1	0	1	YDL140C	Spar
Spar_Spar_4:215967-215970	Spar_YDL140C.215970	0	1	0	1	1	0	0	0	0	1	YDL140C	Spar
Spar_Spar_4:207268-207271	Spar_YDL141W.207268	0	1	0	1	1	0	0	0	0	1	YDL141W	Spar
Spar_Spar_4:207336-207339	Spar_YDL141W.207336	0	1	0	1	0	1	1	1	0	1	YDL141W	Spar
Spar_Spar_4:202543-202546	Spar_YDL145C.202546	0	1	0	1	1	0	0	0	0	1	YDL145C	Spar
Spar_Spar_4:202561-202564	Spar_YDL145C.202564	0	1	0	1	1	0	1	1	0	1	YDL145C	Spar
Spar_Spar_4:202622-202625	Spar_YDL145C.202625	0	1	0	1	1	0	0	0	0	1	YDL145C	Spar
Spar_Spar_4:202693-202696	Spar_YDL145C.202696	0	1	1	0	1	0	0	0	0	1	YDL145C	Spar
Spar_Spar_4:202731-202734	Spar_YDL145C.202734	0	1	1	0	1	0	0	0	0	1	YDL145C	Spar
Spar_Spar_4:176364-176367	Spar_YDL160C.176367	0	1	0	1	0	1	1	0	0	1	YDL160C	Spar
Spar_Spar_4:176385-176388	Spar_YDL160C.176388	0	1	0	1	1	0	0	0	0	1	YDL160C	Spar
Spar_Spar_4:176491-176494	Spar_YDL160C.176494	0	1	1	0	1	0	0	0	0	1	YDL160C	Spar
Spar_Spar_4:176567-176570	Spar_YDL160C.176570	0	1	1	0	1	0	0	0	1	0	YDL160C	Spar
Spar_Spar_4:172061-172064	Spar_YDL161W.172061	0	1	1	0	1	0	0	0	0	1	YDL161W	Spar
Spar_Spar_4:172251-172254	Spar_YDL161W.172251	0	1	0	1	1	0	0	0	0	1	YDL161W	Spar
Spar_Spar_4:172329-172332	Spar_YDL161W.172329	0	1	0	1	1	0	0	0	0	1	YDL161W	Spar
Spar_Spar_4:172368-172371	Spar_YDL161W.172368	0	1	0	1	1	0	0	0	0	1	YDL161W	Spar
Spar_Spar_4:172397-172400	Spar_YDL161W.172397	0	1	0	1	1	0	0	0	0	1	YDL161W	Spar
Spar_Spar_4:172440-172443	Spar_YDL161W.172440	0	1	0	1	1	0	0	0	0	1	YDL161W	Spar
Spar_Spar_4:172571-172574	Spar_YDL161W.172571	1	0	0	0	1	0	0	0	0	1	YDL161W	Spar
Spar_Spar_4:172634-172637	Spar_YDL161W.172634	0	1	0	1	1	0	0	0	0	1	YDL161W	Spar
Spar_Spar_4:172844-172847	Spar_YDL161W.172844	0	1	0	1	1	0	0	0	0	1	YDL161W	Spar
Spar_Spar_4:160056-160059	Spar_YDL171C.160059	0	1	1	0	1	0	0	0	0	1	YDL171C	Spar
Spar_Spar_4:160102-160105	Spar_YDL171C.160105	0	1	0	1	1	0	0	0	0	1	YDL171C	Spar
Spar_Spar_4:160199-160202	Spar_YDL171C.160202	0	1	0	1	0	1	1	1	0	1	YDL171C	Spar
Spar_Spar_4:146207-146210	Spar_YDL177C.146210	1	0	0	0	0	1	1	1	0	1	YDL177C	Spar
Spar_Spar_4:130778-130781	Spar_YDL188C.130781	0	1	0	1	1	0	0	0	0	1	YDL188C	Spar
Spar_Spar_4:130813-130816	Spar_YDL188C.130816	0	1	0	1	1	0	0	0	0	1	YDL188C	Spar
Spar_Spar_4:127391-127394	Spar_YDL190C.127394	0	1	0	1	1	0	0	0	0	1	YDL190C	Spar
Spar_Spar_4:127528-127531	Spar_YDL190C.127531	0	1	0	1	1	0	0	0	0	1	YDL190C	Spar
Spar_Spar_4:120385-120388	Spar_YDL193W.120385	0	1	0	1	1	0	0	0	0	1	YDL193W	Spar
Spar_Spar_4:110280-110283	Spar_YDL198C.110283	1	0	0	0	0	1	1	1	0	1	YDL198C	Spar
Spar_Spar_4:99443-99446	Spar_YDL205C.99446	0	1	1	0	1	0	0	0	0	1	YDL205C	Spar
Spar_Spar_4:99480-99483	Spar_YDL205C.99483	0	1	0	1	1	0	0	0	0	1	YDL205C	Spar
Spar_Spar_4:99514-99517	Spar_YDL205C.99517	0	1	0	1	1	0	0	0	0	1	YDL205C	Spar
Spar_Spar_4:99546-99549	Spar_YDL205C.99549	1	0	0	0	1	0	0	0	0	1	YDL205C	Spar
Spar_Spar_4:74319-74322	Spar_YDL217C.74322	0	1	1	0	1	0	0	0	0	1	YDL217C	Spar
Spar_Spar_4:74402-74405	Spar_YDL217C.74405	0	1	1	0	1	0	0	0	0	1	YDL217C	Spar
Spar_Spar_4:62103-62106	Spar_YDL224C.62106	0	1	1	0	0	1	0	0	0	1	YDL224C	Spar
Spar_Spar_4:62133-62136	Spar_YDL224C.62136	0	1	1	0	1	0	1	0	0	1	YDL224C	Spar
Spar_Spar_4:62183-62186	Spar_YDL224C.62186	0	1	1	0	1	0	0	0	0	1	YDL224C	Spar
Spar_Spar_4:62272-62275	Spar_YDL224C.62275	0	1	0	1	1	0	0	0	0	1	YDL224C	Spar
Spar_Spar_4:47877-47880	Spar_YDL231C.47880	0	1	0	1	1	0	0	0	0	1	YDL231C	Spar
Spar_Spar_4:39553-39556	Spar_YDL235C.39556	0	1	0	1	1	0	0	0	0	1	YDL235C	Spar
Spar_Spar_4:39608-39611	Spar_YDL235C.39611	0	1	0	1	0	1	0	1	0	1	YDL235C	Spar
Spar_Spar_4:465554-465557	Spar_YDR005C.465557	0	1	0	1	1	0	0	0	0	1	YDR005C	Spar
Spar_Spar_4:465624-465627	Spar_YDR005C.465627	0	1	0	1	1	0	0	0	0	1	YDR005C	Spar
Spar_Spar_4:465770-465773	Spar_YDR005C.465773	0	1	0	1	1	0	0	0	0	1	YDR005C	Spar
Spar_Spar_4:465843-465846	Spar_YDR005C.465846	0	1	0	1	1	0	0	0	0	1	YDR005C	Spar
Spar_Spar_4:465884-465887	Spar_YDR005C.465887	0	1	0	1	1	0	0	0	0	1	YDR005C	Spar
Spar_Spar_4:465914-465917	Spar_YDR005C.465917	0	1	1	0	1	0	0	0	0	1	YDR005C	Spar
Spar_Spar_4:465932-465935	Spar_YDR005C.465935	0	1	0	1	1	0	0	0	0	1	YDR005C	Spar
Spar_Spar_4:466135-466138	Spar_YDR005C.466138	0	1	0	1	1	0	0	0	0	1	YDR005C	Spar
Spar_Spar_4:469158-469161	Spar_YDR006C.469161	0	1	0	1	1	0	0	0	0	1	YDR006C	Spar
Spar_Spar_4:469264-469267	Spar_YDR006C.469267	0	1	0	1	1	0	0	0	0	1	YDR006C	Spar
Spar_Spar_4:473499-473502	Spar_YDR011W.473499	0	1	1	0	1	0	0	0	0	1	YDR011W	Spar
Spar_Spar_4:473603-473606	Spar_YDR011W.473603	0	1	0	1	1	0	0	0	0	1	YDR011W	Spar
Spar_Spar_4:473707-473710	Spar_YDR011W.473707	0	1	0	1	1	0	0	0	0	1	YDR011W	Spar
Spar_Spar_4:480152-480155	Spar_YDR013W.480152	0	1	0	1	1	0	0	0	1	0	YDR013W	Spar
Spar_Spar_4:480272-480275	Spar_YDR013W.480272	0	1	1	0	1	0	0	0	1	0	YDR013W	Spar
Spar_Spar_4:480363-480366	Spar_YDR013W.480363	0	1	0	1	1	0	0	0	0	1	YDR013W	Spar
Spar_Spar_4:480584-480587	Spar_YDR013W.480584	0	1	0	1	1	0	0	0	0	1	YDR013W	Spar
Spar_Spar_4:480653-480656	Spar_YDR013W.480653	0	1	1	0	1	0	0	0	0	1	YDR013W	Spar
Spar_Spar_4:480737-480740	Spar_YDR013W.480737	0	1	0	1	1	0	0	0	0	1	YDR013W	Spar
Spar_Spar_4:494233-494236	Spar_YDR021W.494233	0	1	1	0	1	0	0	0	0	1	YDR021W	Spar
Spar_Spar_4:509611-509614	Spar_YDR028C.509614	0	1	1	0	1	0	1	0	0	1	YDR028C	Spar
Spar_Spar_4:509761-509764	Spar_YDR028C.509764	0	1	0	1	1	0	0	0	0	1	YDR028C	Spar
Spar_Spar_4:516632-516635	Spar_YDR033W.516632	0	1	0	1	1	0	0	0	0	1	YDR033W	Spar
Spar_Spar_4:516709-516712	Spar_YDR033W.516709	0	1	0	1	1	0	0	1	0	1	YDR033W	Spar
Spar_Spar_4:516773-516776	Spar_YDR033W.516773	0	1	1	0	0	1	1	1	0	1	YDR033W	Spar
Spar_Spar_4:516816-516819	Spar_YDR033W.516816	0	1	0	1	0	1	1	1	0	1	YDR033W	Spar
Spar_Spar_4:520813-520816	Spar_YDR034C.520816	0	1	1	0	0	1	1	1	0	1	YDR034C	Spar
Spar_Spar_4:527322-527325	Spar_YDR037W.527322	0	1	1	0	1	0	0	0	1	0	YDR037W	Spar
Spar_Spar_4:542058-542061	Spar_YDR043C.542061	0	1	1	0	1	0	0	0	0	1	YDR043C	Spar
Spar_Spar_4:542131-542134	Spar_YDR043C.542134	1	0	0	0	0	1	1	1	0	1	YDR043C	Spar
Spar_Spar_4:546865-546868	Spar_YDR045C.546868	1	0	0	0	0	1	1	1	0	1	YDR045C	Spar
Spar_Spar_4:549117-549120	Spar_YDR046C.549120	1	0	0	0	0	1	0	1	0	1	YDR046C	Spar
Spar_Spar_4:550008-550011	Spar_YDR047W.550008	0	1	0	1	1	0	0	0	1	0	YDR047W	Spar
Spar_Spar_4:550174-550177	Spar_YDR047W.550174	0	1	0	1	1	0	1	0	1	0	YDR047W	Spar
Spar_Spar_4:555000-555003	Spar_YDR050C.555003	0	1	0	1	1	0	0	0	0	1	YDR050C	Spar
Spar_Spar_4:559191-559194	Spar_YDR052C.559194	0	1	0	1	1	0	0	0	0	1	YDR052C	Spar
Spar_Spar_4:559280-559283	Spar_YDR052C.559283	0	1	0	1	1	0	0	0	0	1	YDR052C	Spar
Spar_Spar_4:575005-575008	Spar_YDR062W.575005	0	1	0	1	1	0	0	0	0	1	YDR062W	Spar
Spar_Spar_4:575073-575076	Spar_YDR062W.575073	0	1	0	1	1	0	1	0	0	1	YDR062W	Spar
Spar_Spar_4:575111-575114	Spar_YDR062W.575111	0	1	0	1	1	0	0	0	0	1	YDR062W	Spar
Spar_Spar_4:575170-575173	Spar_YDR062W.575170	0	1	0	1	0	1	1	1	0	1	YDR062W	Spar
Spar_Spar_4:577474-577477	Spar_YDR063W.577474	0	1	0	1	1	0	0	0	0	1	YDR063W	Spar
Spar_Spar_4:579549-579552	Spar_YDR065W.579549	1	0	0	0	0	1	1	1	0	1	YDR065W	Spar
Spar_Spar_4:588329-588332	Spar_YDR071C.588332	0	1	0	1	0	1	1	1	0	1	YDR071C	Spar
Spar_Spar_4:590220-590223	Spar_YDR072C.590223	0	1	0	1	1	0	1	0	0	1	YDR072C	Spar
Spar_Spar_4:590254-590257	Spar_YDR072C.590257	0	1	0	1	1	0	0	0	0	1	YDR072C	Spar
Spar_Spar_4:590354-590357	Spar_YDR072C.590357	0	1	0	1	1	0	0	0	1	0	YDR072C	Spar
Spar_Spar_4:591014-591017	Spar_YDR073W.591014	1	0	0	0	1	0	0	0	1	0	YDR073W	Spar
Spar_Spar_4:592646-592649	Spar_YDR074W.592646	0	1	1	0	0	1	0	0	0	1	YDR074W	Spar
Spar_Spar_4:592680-592683	Spar_YDR074W.592680	0	1	1	0	0	1	1	0	0	1	YDR074W	Spar
Spar_Spar_4:599585-599588	Spar_YDR077W.599585	0	1	0	1	0	1	1	1	0	1	YDR077W	Spar
Spar_Spar_4:615686-615689	Spar_YDR085C.615689	1	0	0	0	1	0	0	0	1	0	YDR085C	Spar
Spar_Spar_4:615728-615731	Spar_YDR085C.615731	0	1	0	1	1	0	0	0	1	0	YDR085C	Spar
Spar_Spar_4:616027-616030	Spar_YDR086C.616030	0	1	0	1	1	0	0	0	0	1	YDR086C	Spar
Spar_Spar_4:616063-616066	Spar_YDR086C.616066	0	1	1	0	0	1	1	1	0	1	YDR086C	Spar
Spar_Spar_4:617196-617199	Spar_YDR087C.617199	1	0	0	0	1	0	0	0	1	0	YDR087C	Spar
Spar_Spar_4:645263-645266	Spar_YDR099W.645263	0	1	1	0	1	0	0	0	0	1	YDR099W	Spar
Spar_Spar_4:645975-645978	Spar_YDR099W.645975	0	1	0	1	1	0	0	0	0	1	YDR099W	Spar
Spar_Spar_4:646013-646016	Spar_YDR099W.646013	0	1	0	1	1	0	0	0	0	1	YDR099W	Spar
Spar_Spar_4:646041-646044	Spar_YDR099W.646041	0	1	0	1	0	1	1	0	0	1	YDR099W	Spar
Spar_Spar_4:680080-680083	Spar_YDR119W.680080	0	1	0	1	1	0	0	0	0	1	YDR119W	Spar
Spar_Spar_4:685372-685375	Spar_YDR121W.685372	0	1	1	0	1	0	0	0	0	1	YDR121W	Spar
Spar_Spar_4:685410-685413	Spar_YDR121W.685410	0	1	0	1	1	0	1	0	0	1	YDR121W	Spar
Spar_Spar_4:685431-685434	Spar_YDR121W.685431	0	1	0	1	1	0	0	0	0	1	YDR121W	Spar
Spar_Spar_4:712927-712930	Spar_YDR132C.712930	0	1	0	1	1	0	0	0	1	0	YDR132C	Spar
Spar_Spar_4:735946-735949	Spar_YDR143C.735949	0	1	0	1	1	0	0	0	0	1	YDR143C	Spar
Spar_Spar_4:736003-736006	Spar_YDR143C.736006	1	0	0	0	1	0	0	0	0	1	YDR143C	Spar
Spar_Spar_4:758291-758294	Spar_YDR153C.758294	0	1	0	1	0	1	1	1	0	1	YDR153C	Spar
Spar_Spar_4:758341-758344	Spar_YDR153C.758344	0	1	0	1	1	0	0	0	0	1	YDR153C	Spar
Spar_Spar_4:784086-784089	Spar_YDR169C.784089	0	1	0	1	1	0	0	0	0	1	YDR169C	Spar
Spar_Spar_4:784149-784152	Spar_YDR169C.784152	0	1	0	1	1	0	0	1	0	1	YDR169C	Spar
Spar_Spar_4:784255-784258	Spar_YDR169C.784258	0	1	0	1	1	0	0	0	0	1	YDR169C	Spar
Spar_Spar_4:792533-792536	Spar_YDR170C.792536	0	1	0	1	1	0	0	0	0	1	YDR170C	Spar
Spar_Spar_4:792592-792595	Spar_YDR170C.792595	0	1	0	1	1	0	0	0	0	1	YDR170C	Spar
Spar_Spar_4:798948-798951	Spar_YDR173C.798951	0	1	0	1	1	0	0	0	0	1	YDR173C	Spar
Spar_Spar_4:805219-805222	Spar_YDR178W.805219	0	1	1	0	1	0	0	0	0	1	YDR178W	Spar
Spar_Spar_4:818731-818734	Spar_YDR184C.818734	0	1	1	0	1	0	0	0	0	1	YDR184C	Spar
Spar_Spar_4:821153-821156	Spar_YDR186C.821156	0	1	0	1	1	0	0	0	0	1	YDR186C	Spar
Spar_Spar_4:821188-821191	Spar_YDR186C.821191	0	1	0	1	1	0	0	0	0	1	YDR186C	Spar
Spar_Spar_4:848882-848885	Spar_YDR206W.848882	1	0	0	0	1	0	1	0	0	1	YDR206W	Spar
Spar_Spar_4:848922-848925	Spar_YDR206W.848922	1	0	0	0	1	0	0	1	0	1	YDR206W	Spar
Spar_Spar_4:848947-848950	Spar_YDR206W.848947	0	1	0	1	1	0	0	1	0	1	YDR206W	Spar
Spar_Spar_4:849101-849104	Spar_YDR206W.849101	0	1	1	0	0	1	1	0	0	1	YDR206W	Spar
Spar_Spar_4:862600-862603	Spar_YDR212W.862600	0	1	1	0	1	0	0	0	0	1	YDR212W	Spar
Spar_Spar_4:868165-868168	Spar_YDR214W.868165	0	1	1	0	1	0	0	0	0	1	YDR214W	Spar
Spar_Spar_4:868215-868218	Spar_YDR214W.868215	0	1	0	1	1	0	0	0	0	1	YDR214W	Spar
Spar_Spar_4:882284-882287	Spar_YDR219C.882287	0	1	1	0	1	0	1	0	0	1	YDR219C	Spar
Spar_Spar_4:890761-890764	Spar_YDR225W.890761	0	1	0	1	0	1	1	1	0	1	YDR225W	Spar
Spar_Spar_4:902318-902321	Spar_YDR232W.902318	0	1	1	0	1	0	0	0	1	0	YDR232W	Spar
Spar_Spar_4:902480-902483	Spar_YDR232W.902480	0	1	1	0	0	1	1	1	0	1	YDR232W	Spar
Spar_Spar_4:902539-902542	Spar_YDR232W.902539	0	1	0	1	1	0	0	0	0	1	YDR232W	Spar
Spar_Spar_4:905501-905504	Spar_YDR233C.905504	0	1	0	1	1	0	0	0	0	1	YDR233C	Spar
Spar_Spar_4:911686-911689	Spar_YDR237W.911686	0	1	0	1	1	0	0	1	0	1	YDR237W	Spar
Spar_Spar_4:911724-911727	Spar_YDR237W.911724	0	1	1	0	0	1	1	1	0	1	YDR237W	Spar
Spar_Spar_4:935688-935691	Spar_YDR251W.935688	0	1	0	1	1	0	0	0	0	1	YDR251W	Spar
Spar_Spar_4:935715-935718	Spar_YDR251W.935715	0	1	0	1	1	0	0	0	0	1	YDR251W	Spar
Spar_Spar_4:935810-935813	Spar_YDR251W.935810	0	1	0	1	1	0	1	0	0	1	YDR251W	Spar
Spar_Spar_4:1047407-1047410	Spar_YDR266C.1047410	0	1	0	1	1	0	0	0	0	1	YDR266C	Spar
Spar_Spar_4:1047448-1047451	Spar_YDR266C.1047451	0	1	0	1	0	1	1	0	0	1	YDR266C	Spar
Spar_Spar_4:1047485-1047488	Spar_YDR266C.1047488	0	1	1	0	1	0	0	0	0	1	YDR266C	Spar
Spar_Spar_4:1051034-1051037	Spar_YDR270W.1051034	0	1	1	0	1	0	0	0	0	1	YDR270W	Spar
Spar_Spar_4:1059054-1059057	Spar_YDR276C.1059057	0	1	1	0	0	1	1	1	0	1	YDR276C	Spar
Spar_Spar_4:1065211-1065214	Spar_YDR280W.1065211	0	1	1	0	0	1	1	1	0	1	YDR280W	Spar
Spar_Spar_4:1075726-1075729	Spar_YDR284C.1075729	0	1	0	1	1	0	0	0	0	1	YDR284C	Spar
Spar_Spar_4:1075797-1075800	Spar_YDR284C.1075800	0	1	1	0	1	0	0	0	0	1	YDR284C	Spar
Spar_Spar_4:1093682-1093685	Spar_YDR293C.1093685	0	1	0	1	0	1	0	1	0	1	YDR293C	Spar
Spar_Spar_4:1093738-1093741	Spar_YDR293C.1093741	0	1	0	1	1	0	0	0	0	1	YDR293C	Spar
Spar_Spar_4:1093905-1093908	Spar_YDR293C.1093908	0	1	1	0	1	0	1	0	0	1	YDR293C	Spar
Spar_Spar_4:1093928-1093931	Spar_YDR293C.1093931	0	1	0	1	1	0	0	0	0	1	YDR293C	Spar
Spar_Spar_4:1093970-1093973	Spar_YDR293C.1093973	0	1	0	1	1	0	0	0	0	1	YDR293C	Spar
Spar_Spar_4:1094006-1094009	Spar_YDR293C.1094009	0	1	0	1	1	0	1	0	0	1	YDR293C	Spar
Spar_Spar_4:1094084-1094087	Spar_YDR293C.1094087	0	1	0	1	1	0	0	0	0	1	YDR293C	Spar
Spar_Spar_4:1094181-1094184	Spar_YDR293C.1094184	0	1	0	1	1	0	0	0	0	1	YDR293C	Spar
Spar_Spar_4:1094363-1094366	Spar_YDR293C.1094366	0	1	0	1	1	0	0	0	0	1	YDR293C	Spar
Spar_Spar_4:1094403-1094406	Spar_YDR293C.1094406	0	1	0	1	1	0	0	0	0	1	YDR293C	Spar
Spar_Spar_4:1098958-1098961	Spar_YDR295C.1098961	0	1	1	0	1	0	0	0	0	1	YDR295C	Spar
Spar_Spar_4:1103108-1103111	Spar_YDR298C.1103111	0	1	1	0	1	0	0	0	0	1	YDR298C	Spar
Spar_Spar_4:1103147-1103150	Spar_YDR298C.1103150	0	1	1	0	1	0	0	0	0	1	YDR298C	Spar
Spar_Spar_4:1115668-1115671	Spar_YDR303C.1115671	0	1	0	1	1	0	0	1	0	1	YDR303C	Spar
Spar_Spar_4:1128551-1128554	Spar_YDR310C.1128554	0	1	0	1	1	0	1	0	0	1	YDR310C	Spar
Spar_Spar_4:1128573-1128576	Spar_YDR310C.1128576	0	1	0	1	1	0	0	0	0	1	YDR310C	Spar
Spar_Spar_4:1128636-1128639	Spar_YDR310C.1128639	0	1	0	1	1	0	0	0	0	1	YDR310C	Spar
Spar_Spar_4:1128679-1128682	Spar_YDR310C.1128682	0	1	0	1	1	0	0	0	0	1	YDR310C	Spar
Spar_Spar_4:1163122-1163125	Spar_YDR326C.1163125	0	1	1	0	1	0	0	1	0	1	YDR326C	Spar
Spar_Spar_4:1163222-1163225	Spar_YDR326C.1163225	0	1	0	1	1	0	0	1	0	1	YDR326C	Spar
Spar_Spar_4:1173911-1173914	Spar_YDR334W.1173911	0	1	0	1	1	0	0	0	0	1	YDR334W	Spar
Spar_Spar_4:1173984-1173987	Spar_YDR334W.1173984	0	1	0	1	1	0	1	0	0	1	YDR334W	Spar
Spar_Spar_4:1178971-1178974	Spar_YDR335W.1178971	0	1	1	0	1	0	0	0	0	1	YDR335W	Spar
Spar_Spar_4:1179175-1179178	Spar_YDR335W.1179175	0	1	1	0	1	0	0	0	0	1	YDR335W	Spar
Spar_Spar_4:1012940-1012943	Spar_YDR346C.1012940	0	1	1	0	1	0	0	0	0	1	YDR346C	Spar
Spar_Spar_4:1013029-1013032	Spar_YDR346C.1013029	0	1	0	1	0	1	0	0	0	1	YDR346C	Spar
Spar_Spar_4:1003786-1003789	Spar_YDR351W.1003789	0	1	0	1	1	0	0	0	0	1	YDR351W	Spar
Spar_Spar_4:1003880-1003883	Spar_YDR351W.1003883	0	1	0	1	1	0	0	0	0	1	YDR351W	Spar
Spar_Spar_4:1000579-1000582	Spar_YDR352W.1000582	0	1	0	1	1	0	0	0	0	1	YDR352W	Spar
Spar_Spar_4:987366-987369	Spar_YDR359C.987366	0	1	1	0	1	0	0	1	0	1	YDR359C	Spar
Spar_Spar_4:974899-974902	Spar_YDR367W.974902	0	1	0	1	1	0	0	0	0	1	YDR367W	Spar
Spar_Spar_4:965316-965319	Spar_YDR372C.965316	0	1	0	1	1	0	0	0	0	1	YDR372C	Spar
Spar_Spar_4:965459-965462	Spar_YDR372C.965459	0	1	0	1	1	0	1	0	0	1	YDR372C	Spar
Spar_Spar_4:965489-965492	Spar_YDR372C.965489	0	1	1	0	1	0	0	0	0	1	YDR372C	Spar
Spar_Spar_4:953477-953480	Spar_YDR380W.953480	0	1	1	0	1	0	0	1	0	1	YDR380W	Spar
Spar_Spar_4:951096-951099	Spar_YDR381W.951099	0	1	0	1	0	1	1	1	0	1	YDR381W	Spar
Spar_Spar_4:948133-948136	Spar_YDR382W.948136	0	1	0	1	1	0	0	1	0	1	YDR382W	Spar
Spar_Spar_4:948151-948154	Spar_YDR382W.948154	0	1	0	1	1	0	0	0	0	1	YDR382W	Spar
Spar_Spar_4:948177-948180	Spar_YDR382W.948180	0	1	0	1	1	0	1	0	0	1	YDR382W	Spar
Spar_Spar_4:945468-945471	Spar_YDR384C.945468	1	0	0	0	1	0	0	0	0	1	YDR384C	Spar
Spar_Spar_15:527530-527533	Spar_YDR385W.527530	0	1	0	1	1	0	0	0	1	0	YDR385W	Spar
Spar_Spar_4:1217211-1217214	Spar_YDR389W.1217211	0	1	0	1	1	0	0	1	0	1	YDR389W	Spar
Spar_Spar_4:1217298-1217301	Spar_YDR389W.1217298	0	1	0	1	1	0	0	0	0	1	YDR389W	Spar
Spar_Spar_4:1217453-1217456	Spar_YDR389W.1217453	0	1	0	1	1	0	0	0	0	1	YDR389W	Spar
Spar_Spar_4:1217568-1217571	Spar_YDR389W.1217568	0	1	0	1	1	0	0	0	0	1	YDR389W	Spar
Spar_Spar_4:1228868-1228871	Spar_YDR395W.1228868	0	1	0	1	1	0	0	0	0	1	YDR395W	Spar
Spar_Spar_4:1228923-1228926	Spar_YDR395W.1228923	0	1	1	0	0	1	1	0	0	1	YDR395W	Spar
Spar_Spar_4:1235663-1235666	Spar_YDR399W.1235663	0	1	0	1	1	0	0	0	0	1	YDR399W	Spar
Spar_Spar_4:1242963-1242966	Spar_YDR404C.1242966	0	1	1	0	1	0	1	0	0	1	YDR404C	Spar
Spar_Spar_4:1312176-1312179	Spar_YDR436W.1312176	0	1	1	0	1	0	0	0	0	1	YDR436W	Spar
Spar_Spar_4:1333582-1333585	Spar_YDR447C.1333585	0	1	0	1	1	0	0	0	0	1	YDR447C	Spar
Spar_Spar_4:1333596-1333599	Spar_YDR447C.1333599	0	1	0	1	1	0	0	0	0	1	YDR447C	Spar
Spar_Spar_4:1344871-1344874	Spar_YDR454C.1344874	0	1	1	0	1	0	0	0	1	0	YDR454C	Spar
Spar_Spar_4:1381214-1381217	Spar_YDR472W.1381214	0	1	0	1	1	0	0	0	0	1	YDR472W	Spar
Spar_Spar_4:1389817-1389820	Spar_YDR477W.1389817	0	1	0	1	1	0	0	0	0	1	YDR477W	Spar
Spar_Spar_4:1389969-1389972	Spar_YDR477W.1389969	0	1	1	0	1	0	1	0	0	1	YDR477W	Spar
Spar_Spar_4:1390007-1390010	Spar_YDR477W.1390007	0	1	0	1	1	0	0	0	0	1	YDR477W	Spar
Spar_Spar_4:1412618-1412621	Spar_YDR492W.1412618	0	1	0	1	1	0	0	0	0	1	YDR492W	Spar
Spar_Spar_4:1443788-1443791	Spar_YDR507C.1443791	0	1	0	1	1	0	1	0	0	1	YDR507C	Spar
Spar_Spar_4:1443813-1443816	Spar_YDR507C.1443816	0	1	1	0	1	0	0	0	0	1	YDR507C	Spar
Spar_Spar_4:1446487-1446490	Spar_YDR508C.1446490	0	1	0	1	1	0	0	0	1	0	YDR508C	Spar
Spar_Spar_4:1467871-1467874	Spar_YDR524C-B.1467874	0	1	0	1	1	0	0	0	0	1	YDR524C-B	Spar
Spar_Spar_4:1467071-1467074	Spar_YDR524C.1467074	0	1	1	0	1	0	1	1	0	1	YDR524C	Spar
Spar_Spar_4:1467454-1467457	Spar_YDR524C.1467457	1	0	0	0	1	0	0	0	0	1	YDR524C	Spar
Spar_Spar_4:1467595-1467598	Spar_YDR524C.1467598	0	1	0	1	1	0	0	0	1	0	YDR524C	Spar
Spar_Spar_4:1467623-1467626	Spar_YDR524C.1467626	0	1	0	1	1	0	0	0	1	0	YDR524C	Spar
Spar_Spar_4:1472601-1472604	Spar_YDR528W.1472601	0	1	1	0	1	0	0	0	0	1	YDR528W	Spar
Spar_Spar_5:151141-151144	Spar_YEL002C.151144	0	1	1	0	1	0	0	0	0	1	YEL002C	Spar
Spar_Spar_5:144788-144791	Spar_YEL006W.144788	0	1	0	1	1	0	0	0	1	0	YEL006W	Spar
Spar_Spar_5:129924-129927	Spar_YEL009C.129927	0	1	0	1	1	0	0	0	0	1	YEL009C	Spar
Spar_Spar_5:130002-130005	Spar_YEL009C.130005	1	0	0	0	0	1	1	1	0	1	YEL009C	Spar
Spar_Spar_5:130031-130034	Spar_YEL009C.130034	1	0	0	0	0	1	1	1	0	1	YEL009C	Spar
Spar_Spar_5:130084-130087	Spar_YEL009C.130087	0	1	1	0	1	0	0	0	0	1	YEL009C	Spar
Spar_Spar_5:130149-130152	Spar_YEL009C.130152	1	0	0	0	0	1	1	0	0	1	YEL009C	Spar
Spar_Spar_5:130192-130195	Spar_YEL009C.130195	0	1	1	0	1	0	0	0	0	1	YEL009C	Spar
Spar_Spar_5:130216-130219	Spar_YEL009C.130219	1	0	0	0	0	1	1	1	0	1	YEL009C	Spar
Spar_Spar_5:130243-130246	Spar_YEL009C.130246	0	1	0	1	0	1	1	0	0	1	YEL009C	Spar
Spar_Spar_5:130287-130290	Spar_YEL009C.130290	0	1	0	1	0	1	0	0	0	1	YEL009C	Spar
Spar_Spar_5:107216-107219	Spar_YEL013W.107216	0	1	0	1	1	0	0	0	0	1	YEL013W	Spar
Spar_Spar_5:107298-107301	Spar_YEL013W.107298	0	1	0	1	0	1	1	1	0	1	YEL013W	Spar
Spar_Spar_5:107337-107340	Spar_YEL013W.107337	0	1	0	1	1	0	0	0	0	1	YEL013W	Spar
Spar_Spar_5:107410-107413	Spar_YEL013W.107410	0	1	0	1	0	1	0	1	0	1	YEL013W	Spar
Spar_Spar_5:95975-95978	Spar_YEL020C-B.95978	0	1	0	1	1	0	0	0	0	1	YEL020C-B	Spar
Spar_Spar_5:96136-96139	Spar_YEL020C-B.96139	0	1	0	1	0	1	0	0	0	1	YEL020C-B	Spar
Spar_Spar_5:96154-96157	Spar_YEL020C-B.96157	0	1	0	1	0	1	1	1	0	1	YEL020C-B	Spar
Spar_Spar_5:96260-96263	Spar_YEL020C-B.96263	0	1	0	1	1	0	1	0	0	1	YEL020C-B	Spar
Spar_Spar_5:96380-96383	Spar_YEL020C-B.96383	0	1	0	1	1	0	0	1	0	1	YEL020C-B	Spar
Spar_Spar_5:96469-96472	Spar_YEL020C-B.96472	0	1	1	0	1	0	1	0	0	1	YEL020C-B	Spar
Spar_Spar_5:85583-85586	Spar_YEL024W.85583	0	1	0	1	1	0	0	0	0	1	YEL024W	Spar
Spar_Spar_5:80209-80212	Spar_YEL026W.80209	0	1	0	1	1	0	0	0	1	0	YEL026W	Spar
Spar_Spar_5:80276-80279	Spar_YEL026W.80276	0	1	1	0	0	1	1	1	0	1	YEL026W	Spar
Spar_Spar_5:79086-79089	Spar_YEL027W.79086	0	1	1	0	1	0	0	1	0	1	YEL027W	Spar
Spar_Spar_5:63478-63481	Spar_YEL034W.63478	0	1	0	1	1	0	0	0	1	0	YEL034W	Spar
Spar_Spar_5:63516-63519	Spar_YEL034W.63516	0	1	0	1	0	1	1	1	0	1	YEL034W	Spar
Spar_Spar_5:62425-62428	Spar_YEL036C.62428	1	0	0	0	0	1	1	1	0	1	YEL036C	Spar
Spar_Spar_5:60510-60513	Spar_YEL037C.60513	0	1	0	1	1	0	0	1	0	1	YEL037C	Spar
Spar_Spar_5:60574-60577	Spar_YEL037C.60577	0	1	0	1	1	0	0	0	0	1	YEL037C	Spar
Spar_Spar_5:51535-51538	Spar_YEL042W.51535	0	1	1	0	1	0	0	0	0	1	YEL042W	Spar
Spar_Spar_5:51597-51600	Spar_YEL042W.51597	0	1	0	1	1	0	1	1	0	1	YEL042W	Spar
Spar_Spar_5:47584-47587	Spar_YEL044W.47584	1	0	0	0	1	0	0	0	1	0	YEL044W	Spar
Spar_Spar_5:13504-13507	Spar_YEL063C.13507	0	1	0	1	1	0	0	0	0	1	YEL063C	Spar
Spar_Spar_5:13594-13597	Spar_YEL063C.13597	0	1	0	1	1	0	0	0	0	1	YEL063C	Spar
Spar_Spar_5:195814-195817	Spar_YER019C-A.195817	1	0	0	0	1	0	0	0	1	0	YER019C-A	Spar
Spar_Spar_5:239364-239367	Spar_YER044C.239367	0	1	0	1	1	0	0	0	1	0	YER044C	Spar
Spar_Spar_5:258987-258990	Spar_YER052C.258990	0	1	0	1	1	0	0	0	0	1	YER052C	Spar
Spar_Spar_5:262066-262069	Spar_YER053C-A.262069	0	1	0	1	1	0	0	0	0	1	YER053C-A	Spar
Spar_Spar_5:269112-269115	Spar_YER056C.269115	0	1	0	1	1	0	0	0	0	1	YER056C	Spar
Spar_Spar_5:269144-269147	Spar_YER056C.269147	0	1	0	1	1	0	0	0	0	1	YER056C	Spar
Spar_Spar_5:269184-269187	Spar_YER056C.269187	1	0	0	0	1	0	0	0	1	0	YER056C	Spar
Spar_Spar_5:269271-269274	Spar_YER056C.269274	1	0	0	0	1	0	0	0	1	0	YER056C	Spar
Spar_Spar_5:272153-272156	Spar_YER057C.272156	0	1	0	1	0	1	0	1	0	1	YER057C	Spar
Spar_Spar_5:285288-285291	Spar_YER064C.285291	0	1	0	1	1	0	0	0	0	1	YER064C	Spar
Spar_Spar_5:293483-293486	Spar_YER068W.293483	0	1	0	1	1	0	0	0	0	1	YER068W	Spar
Spar_Spar_5:303212-303215	Spar_YER072W.303212	0	1	0	1	0	1	0	0	0	1	YER072W	Spar
Spar_Spar_5:332814-332817	Spar_YER081W.332814	0	1	0	1	1	0	1	0	1	0	YER081W	Spar
Spar_Spar_5:347990-347993	Spar_YER089C.347993	0	1	1	0	0	1	1	1	0	1	YER089C	Spar
Spar_Spar_5:348053-348056	Spar_YER089C.348056	0	1	1	0	1	0	0	0	0	1	YER089C	Spar
Spar_Spar_5:348118-348121	Spar_YER089C.348121	0	1	0	1	1	0	0	0	0	1	YER089C	Spar
Spar_Spar_5:348184-348187	Spar_YER089C.348187	0	1	1	0	0	1	1	1	0	1	YER089C	Spar
Spar_Spar_5:348226-348229	Spar_YER089C.348229	0	1	1	0	1	0	0	0	0	1	YER089C	Spar
Spar_Spar_5:360284-360287	Spar_YER094C.360287	0	1	1	0	0	1	1	1	0	1	YER094C	Spar
Spar_Spar_5:360333-360336	Spar_YER094C.360336	0	1	1	0	1	0	0	0	0	1	YER094C	Spar
Spar_Spar_5:373742-373745	Spar_YER102W.373742	1	0	0	0	1	0	0	0	0	1	YER102W	Spar
Spar_Spar_5:373761-373764	Spar_YER102W.373761	1	0	0	0	1	0	0	0	0	1	YER102W	Spar
Spar_Spar_5:373827-373830	Spar_YER102W.373827	0	1	0	1	1	0	0	0	0	1	YER102W	Spar
Spar_Spar_5:373909-373912	Spar_YER102W.373909	1	0	0	0	1	0	0	0	0	1	YER102W	Spar
Spar_Spar_5:374794-374797	Spar_YER103W.374794	0	1	0	1	1	0	0	0	0	1	YER103W	Spar
Spar_Spar_5:375187-375190	Spar_YER103W.375187	1	0	0	0	1	0	0	0	0	1	YER103W	Spar
Spar_Spar_5:385690-385693	Spar_YER107C.385693	0	1	0	1	1	0	1	0	0	1	YER107C	Spar
Spar_Spar_5:393298-393301	Spar_YER110C.393301	0	1	0	1	1	0	0	0	0	1	YER110C	Spar
Spar_Spar_5:401081-401084	Spar_YER113C.401084	0	1	0	1	1	0	0	0	0	1	YER113C	Spar
Spar_Spar_5:404767-404770	Spar_YER114C.404770	0	1	0	1	1	0	0	0	0	1	YER114C	Spar
Spar_Spar_5:404869-404872	Spar_YER114C.404872	0	1	1	0	1	0	0	0	0	1	YER114C	Spar
Spar_Spar_5:407765-407768	Spar_YER117W.407765	0	1	0	1	1	0	0	0	0	1	YER117W	Spar
Spar_Spar_5:415406-415409	Spar_YER122C.415409	0	1	0	1	1	0	0	0	0	1	YER122C	Spar
Spar_Spar_5:415703-415706	Spar_YER123W.415703	0	1	1	0	1	0	0	0	0	1	YER123W	Spar
Spar_Spar_5:415745-415748	Spar_YER123W.415745	0	1	1	0	1	0	1	0	0	1	YER123W	Spar
Spar_Spar_5:420871-420874	Spar_YER125W.420871	0	1	1	0	1	0	0	0	0	1	YER125W	Spar
Spar_Spar_5:420899-420902	Spar_YER125W.420899	0	1	0	1	1	0	0	0	0	1	YER125W	Spar
Spar_Spar_5:420920-420923	Spar_YER125W.420920	0	1	0	1	1	0	0	0	0	1	YER125W	Spar
Spar_Spar_5:421028-421031	Spar_YER125W.421028	0	1	0	1	1	0	1	0	0	1	YER125W	Spar
Spar_Spar_5:421072-421075	Spar_YER125W.421072	0	1	0	1	1	0	0	0	0	1	YER125W	Spar
Spar_Spar_5:421122-421125	Spar_YER125W.421122	0	1	0	1	1	0	0	0	0	1	YER125W	Spar
Spar_Spar_5:427644-427647	Spar_YER129W.427644	1	0	0	0	1	0	0	0	1	0	YER129W	Spar
Spar_Spar_5:434550-434553	Spar_YER131W.434550	1	0	0	0	1	0	0	0	0	1	YER131W	Spar
Spar_Spar_5:434680-434683	Spar_YER131W.434680	1	0	0	0	1	0	0	0	0	1	YER131W	Spar
Spar_Spar_5:470720-470723	Spar_YER148W.470720	0	1	1	0	0	1	0	0	0	1	YER148W	Spar
Spar_Spar_5:470777-470780	Spar_YER148W.470777	0	1	0	1	1	0	1	0	0	1	YER148W	Spar
Spar_Spar_5:470852-470855	Spar_YER148W.470852	0	1	0	1	0	1	0	0	0	1	YER148W	Spar
Spar_Spar_5:490202-490205	Spar_YER155C.490205	0	1	0	1	1	0	0	0	1	0	YER155C	Spar
Spar_Spar_5:498671-498674	Spar_YER159C.498674	0	1	0	1	0	1	0	0	0	1	YER159C	Spar
Spar_Spar_5:498782-498785	Spar_YER159C.498785	1	0	0	0	0	1	0	0	0	1	YER159C	Spar
Spar_Spar_5:506587-506590	Spar_YER164W.506587	0	1	1	0	1	0	0	0	0	1	YER164W	Spar
Spar_Spar_5:506684-506687	Spar_YER164W.506684	0	1	0	1	1	0	0	0	0	1	YER164W	Spar
Spar_Spar_5:511733-511736	Spar_YER165W.511733	0	1	0	1	1	0	0	0	0	1	YER165W	Spar
Spar_Spar_5:519464-519467	Spar_YER167W.519464	0	1	0	1	1	0	0	0	0	1	YER167W	Spar
Spar_Spar_5:519504-519507	Spar_YER167W.519504	0	1	0	1	1	0	0	0	0	1	YER167W	Spar
Spar_Spar_5:524702-524705	Spar_YER169W.524702	0	1	0	1	1	0	0	0	0	1	YER169W	Spar
Spar_Spar_5:528483-528486	Spar_YER171W.528483	0	1	0	1	1	0	0	0	0	1	YER171W	Spar
Spar_Spar_5:540617-540620	Spar_YER174C.540620	0	1	0	1	1	0	0	0	0	1	YER174C	Spar
Spar_Spar_5:547012-547015	Spar_YER177W.547012	0	1	0	1	1	0	0	0	1	0	YER177W	Spar
Spar_Spar_6:164377-164380	Spar_YFL005W.164377	0	1	0	1	1	0	0	1	0	1	YFL005W	Spar
Spar_Spar_6:150084-150087	Spar_YFL009W.150084	0	1	0	1	1	0	0	0	0	1	YFL009W	Spar
Spar_Spar_6:150194-150197	Spar_YFL009W.150194	0	1	1	0	0	1	1	1	0	1	YFL009W	Spar
Spar_Spar_6:123855-123858	Spar_YFL024C.123858	0	1	0	1	1	0	0	1	0	1	YFL024C	Spar
Spar_Spar_6:123927-123930	Spar_YFL024C.123930	0	1	0	1	1	0	0	0	0	1	YFL024C	Spar
Spar_Spar_6:124011-124014	Spar_YFL024C.124014	0	1	1	0	1	0	0	0	0	1	YFL024C	Spar
Spar_Spar_6:124073-124076	Spar_YFL024C.124076	0	1	0	1	1	0	0	0	0	1	YFL024C	Spar
Spar_Spar_6:109437-109440	Spar_YFL030W.109437	0	1	0	1	0	1	0	0	1	0	YFL030W	Spar
Spar_Spar_6:89344-89347	Spar_YFL038C.89347	0	1	0	1	1	0	0	1	1	0	YFL038C	Spar
Spar_Spar_6:88050-88053	Spar_YFL039C.88053	0	1	0	1	1	0	1	0	0	1	YFL039C	Spar
Spar_Spar_6:88201-88204	Spar_YFL039C.88204	0	1	0	1	1	0	0	0	1	0	YFL039C	Spar
Spar_Spar_6:77742-77745	Spar_YFL045C.77745	0	1	0	1	1	0	1	0	0	1	YFL045C	Spar
Spar_Spar_6:220081-220084	Spar_YFR020W.220081	1	0	0	0	1	0	0	0	0	1	YFR020W	Spar
Spar_Spar_6:250272-250275	Spar_YFR032C.250275	0	1	0	1	1	0	0	0	0	1	YFR032C	Spar
Spar_Spar_6:251784-251787	Spar_YFR033C.251787	0	1	0	1	0	1	1	1	0	1	YFR033C	Spar
Spar_Spar_6:272982-272985	Spar_YFR048W.272982	1	0	0	0	1	0	0	0	0	1	YFR048W	Spar
Spar_Spar_6:275257-275260	Spar_YFR049W.275257	0	1	1	0	1	0	0	1	0	1	YFR049W	Spar
Spar_Spar_6:275303-275306	Spar_YFR049W.275303	0	1	0	1	0	1	1	1	0	1	YFR049W	Spar
Spar_Spar_6:275356-275359	Spar_YFR049W.275356	0	1	0	1	0	1	0	0	0	1	YFR049W	Spar
Spar_Spar_6:290635-290638	Spar_YFR054C.290638	1	0	0	0	1	0	0	0	1	0	YFR054C	Spar
Spar_Spar_6:290853-290856	Spar_YFR054C.290856	1	0	0	0	1	0	0	0	1	0	YFR054C	Spar
Spar_Spar_6:291041-291044	Spar_YFR054C.291044	1	0	0	0	1	0	0	0	1	0	YFR054C	Spar
Spar_Spar_7:482307-482310	Spar_YGL006W.482307	0	1	0	1	1	0	0	0	0	1	YGL006W	Spar
Spar_Spar_7:482491-482494	Spar_YGL006W.482491	0	1	0	1	0	1	1	1	0	1	YGL006W	Spar
Spar_Spar_7:479620-479623	Spar_YGL007C-A.479623	0	1	0	1	1	0	0	0	0	1	YGL007C-A	Spar
Spar_Spar_7:479676-479679	Spar_YGL007C-A.479679	0	1	0	1	1	0	0	0	0	1	YGL007C-A	Spar
Spar_Spar_7:479754-479757	Spar_YGL007C-A.479757	0	1	0	1	1	0	0	0	1	0	YGL007C-A	Spar
Spar_Spar_7:479257-479260	Spar_YGL008C.479260	0	1	0	1	1	0	0	1	0	1	YGL008C	Spar
Spar_Spar_7:479383-479386	Spar_YGL008C.479386	0	1	0	1	0	1	1	1	0	1	YGL008C	Spar
Spar_Spar_7:479415-479418	Spar_YGL008C.479418	0	1	1	0	0	1	1	1	0	1	YGL008C	Spar
Spar_Spar_7:475282-475285	Spar_YGL009C.475285	0	1	1	0	1	0	0	0	0	1	YGL009C	Spar
Spar_Spar_7:462516-462519	Spar_YGL014W.462516	0	1	0	1	1	0	0	0	0	1	YGL014W	Spar
Spar_Spar_7:462553-462556	Spar_YGL014W.462553	0	1	1	0	1	0	0	0	0	1	YGL014W	Spar
Spar_Spar_7:462628-462631	Spar_YGL014W.462628	0	1	1	0	1	0	0	0	0	1	YGL014W	Spar
Spar_Spar_7:462736-462739	Spar_YGL014W.462736	0	1	0	1	1	0	0	0	0	1	YGL014W	Spar
Spar_Spar_7:439644-439647	Spar_YGL028C.439647	0	1	1	0	1	0	1	0	0	1	YGL028C	Spar
Spar_Spar_7:439713-439716	Spar_YGL028C.439716	0	1	0	1	1	0	0	0	0	1	YGL028C	Spar
Spar_Spar_7:440003-440006	Spar_YGL028C.440006	0	1	1	0	0	1	1	0	0	1	YGL028C	Spar
Spar_Spar_7:434376-434379	Spar_YGL031C.434379	0	1	0	1	1	0	0	0	0	1	YGL031C	Spar
Spar_Spar_7:434504-434507	Spar_YGL031C.434507	1	0	0	0	1	0	0	0	0	1	YGL031C	Spar
Spar_Spar_7:434576-434579	Spar_YGL031C.434579	1	0	0	0	1	0	0	0	0	1	YGL031C	Spar
Spar_Spar_7:423959-423962	Spar_YGL037C.423962	0	1	0	1	1	0	1	0	0	1	YGL037C	Spar
Spar_Spar_7:419901-419904	Spar_YGL039W.419901	1	0	0	0	1	0	0	0	1	0	YGL039W	Spar
Spar_Spar_7:419971-419974	Spar_YGL039W.419971	0	1	1	0	1	0	0	0	0	1	YGL039W	Spar
Spar_Spar_7:413775-413778	Spar_YGL044C.413778	0	1	0	1	0	1	1	1	0	1	YGL044C	Spar
Spar_Spar_7:413795-413798	Spar_YGL044C.413798	0	1	0	1	1	0	0	0	0	1	YGL044C	Spar
Spar_Spar_7:413840-413843	Spar_YGL044C.413843	0	1	0	1	1	0	0	0	0	1	YGL044C	Spar
Spar_Spar_7:413918-413921	Spar_YGL044C.413921	0	1	0	1	1	0	0	0	0	1	YGL044C	Spar
Spar_Spar_7:405826-405829	Spar_YGL049C.405829	0	1	0	1	1	0	0	0	0	1	YGL049C	Spar
Spar_Spar_7:405863-405866	Spar_YGL049C.405866	0	1	0	1	1	0	0	0	0	1	YGL049C	Spar
Spar_Spar_7:405925-405928	Spar_YGL049C.405928	0	1	1	0	1	0	0	0	0	1	YGL049C	Spar
Spar_Spar_7:396989-396992	Spar_YGL055W.396989	0	1	0	1	0	1	1	1	0	1	YGL055W	Spar
Spar_Spar_7:381976-381979	Spar_YGL063W.381976	1	0	0	0	1	0	0	0	0	1	YGL063W	Spar
Spar_Spar_7:369981-369984	Spar_YGL071W.369981	1	0	0	0	1	0	0	0	1	0	YGL071W	Spar
Spar_Spar_7:370438-370441	Spar_YGL071W.370438	0	1	0	1	1	0	0	1	0	1	YGL071W	Spar
Spar_Spar_7:362489-362492	Spar_YGL077C.362492	0	1	0	1	1	0	1	0	0	1	YGL077C	Spar
Spar_Spar_7:357879-357882	Spar_YGL079W.357879	1	0	0	0	1	0	0	0	1	0	YGL079W	Spar
Spar_Spar_7:333011-333014	Spar_YGL094C.333014	0	1	0	1	1	0	0	0	0	1	YGL094C	Spar
Spar_Spar_7:333125-333128	Spar_YGL094C.333128	0	1	1	0	1	0	0	0	0	1	YGL094C	Spar
Spar_Spar_7:310769-310772	Spar_YGL103W.310769	0	1	0	1	1	0	0	0	1	0	YGL103W	Spar
Spar_Spar_7:307273-307276	Spar_YGL105W.307273	0	1	0	1	1	0	0	0	1	0	YGL105W	Spar
Spar_Spar_7:291868-291871	Spar_YGL115W.291868	0	1	0	1	1	0	0	0	0	1	YGL115W	Spar
Spar_Spar_7:279679-279682	Spar_YGL122C.279682	1	0	0	0	1	0	0	0	0	1	YGL122C	Spar
Spar_Spar_7:276781-276784	Spar_YGL123W.276781	0	1	0	1	1	0	0	0	1	0	YGL123W	Spar
Spar_Spar_7:276845-276848	Spar_YGL123W.276845	0	1	0	1	1	0	0	1	0	1	YGL123W	Spar
Spar_Spar_7:254833-254836	Spar_YGL134W.254833	0	1	0	1	1	0	0	0	0	1	YGL134W	Spar
Spar_Spar_7:254879-254882	Spar_YGL134W.254879	1	0	0	0	0	1	1	1	0	1	YGL134W	Spar
Spar_Spar_7:253853-253856	Spar_YGL135W.253853	0	1	1	0	0	1	1	1	0	1	YGL135W	Spar
Spar_Spar_7:253322-253325	Spar_YGL136C.253325	1	0	0	0	1	0	0	0	0	1	YGL136C	Spar
Spar_Spar_7:244933-244936	Spar_YGL139W.244933	0	1	0	1	1	0	0	0	0	1	YGL139W	Spar
Spar_Spar_7:244310-244313	Spar_YGL140C.244313	0	1	1	0	1	0	0	0	0	1	YGL140C	Spar
Spar_Spar_7:208231-208234	Spar_YGL157W.208231	1	0	0	0	1	0	0	0	1	0	YGL157W	Spar
Spar_Spar_7:190609-190612	Spar_YGL167C.190612	0	1	0	1	0	1	0	0	0	1	YGL167C	Spar
Spar_Spar_7:190671-190674	Spar_YGL167C.190674	0	1	0	1	1	0	0	0	0	1	YGL167C	Spar
Spar_Spar_7:190822-190825	Spar_YGL167C.190825	0	1	0	1	1	0	0	0	0	1	YGL167C	Spar
Spar_Spar_7:190871-190874	Spar_YGL167C.190874	0	1	1	0	1	0	0	0	0	1	YGL167C	Spar
Spar_Spar_7:186075-186078	Spar_YGL169W.186075	1	0	0	0	0	1	0	1	0	1	YGL169W	Spar
Spar_Spar_7:180213-180216	Spar_YGL173C.180216	0	1	0	1	0	1	0	0	0	1	YGL173C	Spar
Spar_Spar_7:180248-180251	Spar_YGL173C.180251	0	1	0	1	1	0	0	1	0	1	YGL173C	Spar
Spar_Spar_7:180398-180401	Spar_YGL173C.180401	0	1	1	0	1	0	0	0	0	1	YGL173C	Spar
Spar_Spar_7:167113-167116	Spar_YGL178W.167113	0	1	0	1	1	0	0	0	0	1	YGL178W	Spar
Spar_Spar_7:167319-167322	Spar_YGL178W.167319	0	1	0	1	1	0	0	0	0	1	YGL178W	Spar
Spar_Spar_7:148824-148827	Spar_YGL189C.148827	1	0	0	0	1	0	0	0	0	1	YGL189C	Spar
Spar_Spar_7:148880-148883	Spar_YGL189C.148883	1	0	0	0	1	0	0	1	0	1	YGL189C	Spar
Spar_Spar_7:148942-148945	Spar_YGL189C.148945	0	1	0	1	1	0	0	1	0	1	YGL189C	Spar
Spar_Spar_7:148982-148985	Spar_YGL189C.148985	1	0	0	0	1	0	0	0	0	1	YGL189C	Spar
Spar_Spar_7:149027-149030	Spar_YGL189C.149030	0	1	0	1	1	0	0	0	0	1	YGL189C	Spar
Spar_Spar_7:147518-147521	Spar_YGL190C.147521	0	1	0	1	0	1	1	1	0	1	YGL190C	Spar
Spar_Spar_7:147597-147600	Spar_YGL190C.147600	0	1	0	1	1	0	0	0	0	1	YGL190C	Spar
Spar_Spar_7:147653-147656	Spar_YGL190C.147656	0	1	1	0	0	1	0	1	0	1	YGL190C	Spar
Spar_Spar_7:147748-147751	Spar_YGL190C.147751	0	1	0	1	1	0	0	0	0	1	YGL190C	Spar
Spar_Spar_7:147823-147826	Spar_YGL190C.147826	0	1	1	0	1	0	0	0	1	0	YGL190C	Spar
Spar_Spar_7:147915-147918	Spar_YGL190C.147918	0	1	1	0	1	0	0	0	1	0	YGL190C	Spar
Spar_Spar_7:144851-144854	Spar_YGL191W.144851	1	0	0	0	1	0	0	0	1	0	YGL191W	Spar
Spar_Spar_7:118156-118159	Spar_YGL202W.118159	0	1	0	1	0	1	0	0	0	1	YGL202W	Spar
Spar_Spar_7:107946-107949	Spar_YGL206C.107949	0	1	1	0	0	1	1	1	0	1	YGL206C	Spar
Spar_Spar_7:107979-107982	Spar_YGL206C.107982	0	1	0	1	1	0	0	0	1	0	YGL206C	Spar
Spar_Spar_7:99324-99327	Spar_YGL207W.99324	0	1	1	0	1	0	0	0	0	1	YGL207W	Spar
Spar_Spar_7:87859-87862	Spar_YGL215W.87859	0	1	0	1	1	0	0	0	0	1	YGL215W	Spar
Spar_Spar_7:88052-88055	Spar_YGL215W.88052	0	1	0	1	1	0	0	0	0	1	YGL215W	Spar
Spar_Spar_7:85036-85039	Spar_YGL216W.85036	0	1	0	1	1	0	0	0	0	1	YGL216W	Spar
Spar_Spar_7:81466-81469	Spar_YGL222C.81469	0	1	0	1	1	0	0	0	0	1	YGL222C	Spar
Spar_Spar_7:77094-77097	Spar_YGL225W.77094	0	1	1	0	1	0	0	0	1	0	YGL225W	Spar
Spar_Spar_7:58187-58190	Spar_YGL236C.58190	1	0	0	0	1	0	0	0	1	0	YGL236C	Spar
Spar_Spar_7:16255-16258	Spar_YGL257C.16258	1	0	0	0	1	0	0	0	0	1	YGL257C	Spar
Spar_Spar_7:494357-494360	Spar_YGR001C.494360	1	0	0	0	1	0	0	0	0	1	YGR001C	Spar
Spar_Spar_7:494416-494419	Spar_YGR001C.494419	0	1	0	1	1	0	0	0	0	1	YGR001C	Spar
Spar_Spar_7:494548-494551	Spar_YGR001C.494551	1	0	0	0	1	0	0	0	0	1	YGR001C	Spar
Spar_Spar_7:513350-513353	Spar_YGR014W.513350	0	1	0	1	1	0	0	0	0	1	YGR014W	Spar
Spar_Spar_7:513371-513374	Spar_YGR014W.513371	0	1	0	1	1	0	1	0	0	1	YGR014W	Spar
Spar_Spar_7:513422-513425	Spar_YGR014W.513422	0	1	0	1	1	0	0	0	0	1	YGR014W	Spar
Spar_Spar_7:529948-529951	Spar_YGR026W.529948	0	1	1	0	1	0	0	0	0	1	YGR026W	Spar
Spar_Spar_7:529969-529972	Spar_YGR026W.529969	0	1	1	0	1	0	1	1	0	1	YGR026W	Spar
Spar_Spar_7:531636-531639	Spar_YGR027C.531639	0	1	0	1	1	0	0	0	0	1	YGR027C	Spar
Spar_Spar_7:531740-531743	Spar_YGR027C.531743	1	0	0	0	1	0	0	0	0	1	YGR027C	Spar
Spar_Spar_7:531773-531776	Spar_YGR027C.531776	1	0	0	0	0	1	0	0	0	1	YGR027C	Spar
Spar_Spar_7:531812-531815	Spar_YGR027C.531815	1	0	0	0	0	1	0	0	0	1	YGR027C	Spar
Spar_Spar_7:552196-552199	Spar_YGR038W.552196	0	1	1	0	1	0	1	0	0	1	YGR038W	Spar
Spar_Spar_7:552258-552261	Spar_YGR038W.552258	0	1	0	1	1	0	0	1	0	1	YGR038W	Spar
Spar_Spar_7:557663-557666	Spar_YGR041W.557663	1	0	0	0	1	0	0	0	1	0	YGR041W	Spar
Spar_Spar_7:557850-557853	Spar_YGR041W.557850	0	1	0	1	1	0	0	0	0	1	YGR041W	Spar
Spar_Spar_7:577293-577296	Spar_YGR054W.577293	0	1	0	1	1	0	0	0	0	1	YGR054W	Spar
Spar_Spar_7:577327-577330	Spar_YGR054W.577327	0	1	0	1	0	1	1	1	0	1	YGR054W	Spar
Spar_Spar_7:577345-577348	Spar_YGR054W.577345	0	1	0	1	1	0	0	0	0	1	YGR054W	Spar
Spar_Spar_7:586222-586225	Spar_YGR057C.586225	1	0	0	0	0	1	1	1	0	1	YGR057C	Spar
Spar_Spar_7:591162-591165	Spar_YGR060W.591162	0	1	0	1	1	0	0	0	1	0	YGR060W	Spar
Spar_Spar_7:600545-600548	Spar_YGR065C.600548	1	0	0	0	1	0	0	0	0	1	YGR065C	Spar
Spar_Spar_7:600583-600586	Spar_YGR065C.600586	1	0	0	0	1	0	0	1	1	0	YGR065C	Spar
Spar_Spar_7:629104-629107	Spar_YGR084C.629107	0	1	0	1	1	0	0	0	0	1	YGR084C	Spar
Spar_Spar_7:629139-629142	Spar_YGR084C.629142	0	1	1	0	1	0	0	0	0	1	YGR084C	Spar
Spar_Spar_7:629263-629266	Spar_YGR084C.629266	0	1	1	0	1	0	0	0	0	1	YGR084C	Spar
Spar_Spar_7:629302-629305	Spar_YGR084C.629305	0	1	0	1	1	0	0	0	0	1	YGR084C	Spar
Spar_Spar_7:629352-629355	Spar_YGR084C.629355	0	1	0	1	1	0	0	0	0	1	YGR084C	Spar
Spar_Spar_7:629395-629398	Spar_YGR084C.629398	0	1	0	1	1	0	0	0	0	1	YGR084C	Spar
Spar_Spar_7:629542-629545	Spar_YGR084C.629545	0	1	0	1	1	0	0	0	0	1	YGR084C	Spar
Spar_Spar_7:629632-629635	Spar_YGR084C.629635	0	1	0	1	1	0	0	0	0	1	YGR084C	Spar
Spar_Spar_7:631534-631537	Spar_YGR086C.631537	0	1	0	1	1	0	1	0	0	1	YGR086C	Spar
Spar_Spar_7:637739-637742	Spar_YGR089W.637739	0	1	0	1	0	1	0	0	0	1	YGR089W	Spar
Spar_Spar_7:637773-637776	Spar_YGR089W.637773	0	1	0	1	1	0	0	0	0	1	YGR089W	Spar
Spar_Spar_7:643542-643545	Spar_YGR090W.643542	0	1	0	1	1	0	0	0	0	1	YGR090W	Spar
Spar_Spar_7:643624-643627	Spar_YGR090W.643624	0	1	1	0	1	0	1	0	0	1	YGR090W	Spar
Spar_Spar_7:643668-643671	Spar_YGR090W.643668	0	1	0	1	1	0	0	0	0	1	YGR090W	Spar
Spar_Spar_7:643706-643709	Spar_YGR090W.643706	0	1	0	1	1	0	0	1	0	1	YGR090W	Spar
Spar_Spar_7:651775-651778	Spar_YGR093W.651775	1	0	0	0	0	1	1	1	0	1	YGR093W	Spar
Spar_Spar_7:726485-726488	Spar_YGR128C.726488	0	1	0	1	1	0	0	0	0	1	YGR128C	Spar
Spar_Spar_7:751712-751715	Spar_YGR143W.751712	0	1	1	0	1	0	0	0	0	1	YGR143W	Spar
Spar_Spar_7:760988-760991	Spar_YGR146C.760991	0	1	0	1	1	0	0	0	0	1	YGR146C	Spar
Spar_Spar_7:761043-761046	Spar_YGR146C.761046	0	1	0	1	1	0	0	0	0	1	YGR146C	Spar
Spar_Spar_7:761130-761133	Spar_YGR146C.761133	0	1	0	1	1	0	0	0	0	1	YGR146C	Spar
Spar_Spar_7:761177-761180	Spar_YGR146C.761180	0	1	0	1	1	0	0	0	0	1	YGR146C	Spar
Spar_Spar_7:761215-761218	Spar_YGR146C.761218	0	1	1	0	1	0	0	0	1	0	YGR146C	Spar
Spar_Spar_7:764154-764157	Spar_YGR148C.764157	0	1	0	1	1	0	0	0	0	1	YGR148C	Spar
Spar_Spar_7:764264-764267	Spar_YGR148C.764267	1	0	0	0	1	0	0	0	0	1	YGR148C	Spar
Spar_Spar_7:764317-764320	Spar_YGR148C.764320	0	1	1	0	1	0	0	0	1	0	YGR148C	Spar
Spar_Spar_7:764777-764780	Spar_YGR149W.764777	0	1	0	1	1	0	0	0	0	1	YGR149W	Spar
Spar_Spar_7:764892-764895	Spar_YGR149W.764892	0	1	0	1	1	0	0	0	0	1	YGR149W	Spar
Spar_Spar_7:765102-765105	Spar_YGR149W.765102	0	1	0	1	1	0	0	0	0	1	YGR149W	Spar
Spar_Spar_7:772334-772337	Spar_YGR153W.772334	0	1	1	0	1	0	0	0	0	1	YGR153W	Spar
Spar_Spar_7:776747-776750	Spar_YGR156W.776747	0	1	0	1	1	0	0	0	0	1	YGR156W	Spar
Spar_Spar_7:776797-776800	Spar_YGR156W.776797	0	1	0	1	0	1	1	0	0	1	YGR156W	Spar
Spar_Spar_7:778530-778533	Spar_YGR157W.778530	0	1	1	0	1	0	0	0	0	1	YGR157W	Spar
Spar_Spar_7:778610-778613	Spar_YGR157W.778610	0	1	1	0	1	0	0	0	0	1	YGR157W	Spar
Spar_Spar_7:778673-778676	Spar_YGR157W.778673	0	1	0	1	1	0	0	0	0	1	YGR157W	Spar
Spar_Spar_7:802977-802980	Spar_YGR169C-A.802980	0	1	0	1	1	0	0	0	0	1	YGR169C-A	Spar
Spar_Spar_7:815074-815077	Spar_YGR175C.815077	0	1	0	1	1	0	1	1	0	1	YGR175C	Spar
Spar_Spar_7:815104-815107	Spar_YGR175C.815107	0	1	0	1	1	0	0	0	0	1	YGR175C	Spar
Spar_Spar_7:819821-819824	Spar_YGR178C.819824	0	1	1	0	1	0	0	0	0	1	YGR178C	Spar
Spar_Spar_7:819855-819858	Spar_YGR178C.819858	0	1	1	0	1	0	0	0	0	1	YGR178C	Spar
Spar_Spar_7:822853-822856	Spar_YGR180C.822856	0	1	0	1	1	0	0	0	0	1	YGR180C	Spar
Spar_Spar_7:822901-822904	Spar_YGR180C.822904	0	1	0	1	1	0	0	0	1	0	YGR180C	Spar
Spar_Spar_7:832883-832886	Spar_YGR184C.832886	0	1	0	1	1	0	0	0	0	1	YGR184C	Spar
Spar_Spar_7:846056-846059	Spar_YGR191W.846056	0	1	1	0	1	0	0	0	0	1	YGR191W	Spar
Spar_Spar_7:846149-846152	Spar_YGR191W.846149	0	1	0	1	1	0	0	0	0	1	YGR191W	Spar
Spar_Spar_7:846173-846176	Spar_YGR191W.846173	0	1	0	1	0	1	1	1	0	1	YGR191W	Spar
Spar_Spar_7:878670-878673	Spar_YGR209C.878673	0	1	0	1	0	1	1	0	0	1	YGR209C	Spar
Spar_Spar_7:884920-884923	Spar_YGR213C.884923	1	0	0	0	1	0	0	0	0	1	YGR213C	Spar
Spar_Spar_7:884948-884951	Spar_YGR213C.884951	1	0	0	0	1	0	0	0	1	0	YGR213C	Spar
Spar_Spar_7:897167-897170	Spar_YGR218W.897167	0	1	0	1	1	0	0	0	0	1	YGR218W	Spar
Spar_Spar_7:897253-897256	Spar_YGR218W.897253	0	1	0	1	1	0	0	0	0	1	YGR218W	Spar
Spar_Spar_7:897309-897312	Spar_YGR218W.897309	0	1	1	0	1	0	0	0	0	1	YGR218W	Spar
Spar_Spar_7:897359-897362	Spar_YGR218W.897359	0	1	0	1	0	1	1	0	0	1	YGR218W	Spar
Spar_Spar_7:915902-915905	Spar_YGR229C.915905	0	1	0	1	1	0	0	1	0	1	YGR229C	Spar
Spar_Spar_7:915991-915994	Spar_YGR229C.915994	0	1	0	1	1	0	0	0	0	1	YGR229C	Spar
Spar_Spar_7:916029-916032	Spar_YGR229C.916032	0	1	0	1	1	0	0	0	0	1	YGR229C	Spar
Spar_Spar_7:916150-916153	Spar_YGR229C.916153	0	1	0	1	1	0	0	0	1	0	YGR229C	Spar
Spar_Spar_7:939076-939079	Spar_YGR240C.939079	0	1	1	0	0	1	1	1	0	1	YGR240C	Spar
Spar_Spar_7:939099-939102	Spar_YGR240C.939102	0	1	0	1	1	0	0	0	0	1	YGR240C	Spar
Spar_Spar_7:939177-939180	Spar_YGR240C.939180	0	1	0	1	1	0	0	1	0	1	YGR240C	Spar
Spar_Spar_7:939213-939216	Spar_YGR240C.939216	0	1	1	0	1	0	0	0	0	1	YGR240C	Spar
Spar_Spar_7:939251-939254	Spar_YGR240C.939254	0	1	1	0	1	0	0	0	0	1	YGR240C	Spar
Spar_Spar_7:944643-944646	Spar_YGR244C.944646	0	1	0	1	0	1	1	1	0	1	YGR244C	Spar
Spar_Spar_7:944687-944690	Spar_YGR244C.944690	0	1	0	1	1	0	0	0	0	1	YGR244C	Spar
Spar_Spar_7:950123-950126	Spar_YGR247W.950123	0	1	0	1	1	0	0	0	0	1	YGR247W	Spar
Spar_Spar_7:950188-950191	Spar_YGR247W.950188	0	1	0	1	1	0	0	0	0	1	YGR247W	Spar
Spar_Spar_7:987002-987005	Spar_YGR264C.987005	0	1	0	1	1	0	0	0	0	1	YGR264C	Spar
Spar_Spar_7:987443-987446	Spar_YGR264C.987446	0	1	0	1	1	0	0	0	1	0	YGR264C	Spar
Spar_Spar_7:990891-990894	Spar_YGR267C.990894	0	1	1	0	1	0	0	1	0	1	YGR267C	Spar
Spar_Spar_7:990938-990941	Spar_YGR267C.990941	0	1	0	1	1	0	1	0	0	1	YGR267C	Spar
Spar_Spar_7:990972-990975	Spar_YGR267C.990975	0	1	0	1	1	0	0	0	0	1	YGR267C	Spar
Spar_Spar_8:87571-87574	Spar_YHL002W.87571	0	1	0	1	1	0	0	0	0	1	YHL002W	Spar
Spar_Spar_8:87637-87640	Spar_YHL002W.87637	0	1	0	1	1	0	0	0	0	1	YHL002W	Spar
Spar_Spar_8:87712-87715	Spar_YHL002W.87712	1	0	0	0	1	0	0	0	0	1	YHL002W	Spar
Spar_Spar_8:82732-82735	Spar_YHL007C.82735	0	1	0	1	1	0	0	0	0	1	YHL007C	Spar
Spar_Spar_8:72587-72590	Spar_YHL011C.72590	0	1	0	1	0	1	1	0	0	1	YHL011C	Spar
Spar_Spar_8:65911-65914	Spar_YHL016C.65914	1	0	0	0	1	0	0	1	0	1	YHL016C	Spar
Spar_Spar_8:100399-100402	Spar_YHR007C.100402	0	1	0	1	0	1	1	0	0	1	YHR007C	Spar
Spar_Spar_8:100452-100455	Spar_YHR007C.100455	0	1	0	1	1	0	0	0	0	1	YHR007C	Spar
Spar_Spar_8:100500-100503	Spar_YHR007C.100503	0	1	0	1	1	0	0	0	0	1	YHR007C	Spar
Spar_Spar_8:104578-104581	Spar_YHR009C.104581	1	0	0	0	0	1	0	1	1	0	YHR009C	Spar
Spar_Spar_8:106162-106165	Spar_YHR011W.106162	0	1	0	1	1	0	0	0	1	0	YHR011W	Spar
Spar_Spar_8:106213-106216	Spar_YHR011W.106213	1	0	0	0	0	1	0	0	0	1	YHR011W	Spar
Spar_Spar_8:122991-122994	Spar_YHR020W.122991	0	1	1	0	1	0	0	0	1	0	YHR020W	Spar
Spar_Spar_8:123006-123009	Spar_YHR020W.123006	0	1	0	1	1	0	0	0	1	0	YHR020W	Spar
Spar_Spar_8:123086-123089	Spar_YHR020W.123086	0	1	0	1	1	0	0	0	0	1	YHR020W	Spar
Spar_Spar_8:127073-127076	Spar_YHR021C.127076	0	1	0	1	1	0	1	0	0	1	YHR021C	Spar
Spar_Spar_8:148745-148748	Spar_YHR030C.148748	0	1	1	0	0	1	1	1	0	1	YHR030C	Spar
Spar_Spar_8:165184-165187	Spar_YHR039C.165187	0	1	0	1	0	1	0	0	0	1	YHR039C	Spar
Spar_Spar_8:185397-185400	Spar_YHR050W.185397	0	1	1	0	1	0	1	0	0	1	YHR050W	Spar
Spar_Spar_8:187453-187456	Spar_YHR051W.187453	0	1	0	1	1	0	0	1	0	1	YHR051W	Spar
Spar_Spar_8:187485-187488	Spar_YHR051W.187485	0	1	1	0	0	1	1	1	0	1	YHR051W	Spar
Spar_Spar_8:190536-190539	Spar_YHR055C.190539	0	1	0	1	1	0	0	0	1	0	YHR055C	Spar
Spar_Spar_8:198407-198410	Spar_YHR061C.198410	0	1	0	1	1	0	0	0	1	0	YHR061C	Spar
Spar_Spar_8:203024-203027	Spar_YHR064C.203027	0	1	1	0	1	0	0	0	1	0	YHR064C	Spar
Spar_Spar_8:212581-212584	Spar_YHR071W.212581	0	1	0	1	1	0	0	0	0	1	YHR071W	Spar
Spar_Spar_8:212660-212663	Spar_YHR071W.212660	1	0	0	0	1	0	0	0	0	1	YHR071W	Spar
Spar_Spar_8:212699-212702	Spar_YHR071W.212699	1	0	0	0	1	0	1	0	0	1	YHR071W	Spar
Spar_Spar_8:217743-217746	Spar_YHR072W-A.217743	1	0	0	0	1	0	0	0	1	0	YHR072W-A	Spar
Spar_Spar_8:217776-217779	Spar_YHR072W-A.217776	0	1	0	1	1	0	0	0	0	1	YHR072W-A	Spar
Spar_Spar_8:231813-231816	Spar_YHR077C.231816	0	1	0	1	1	0	0	0	0	1	YHR077C	Spar
Spar_Spar_8:231836-231839	Spar_YHR077C.231839	1	0	0	0	1	0	0	0	0	1	YHR077C	Spar
Spar_Spar_8:247915-247918	Spar_YHR082C.247918	0	1	0	1	1	0	0	0	0	1	YHR082C	Spar
Spar_Spar_8:248021-248024	Spar_YHR082C.248024	0	1	0	1	1	0	0	0	0	1	YHR082C	Spar
Spar_Spar_8:248282-248285	Spar_YHR082C.248285	0	1	0	1	1	0	0	0	0	1	YHR082C	Spar
Spar_Spar_8:254207-254210	Spar_YHR086W.254207	0	1	0	1	1	0	0	0	0	1	YHR086W	Spar
Spar_Spar_8:256877-256880	Spar_YHR087W.256877	0	1	0	1	1	0	0	0	0	1	YHR087W	Spar
Spar_Spar_8:297869-297872	Spar_YHR103W.297869	0	1	0	1	1	0	0	0	0	1	YHR103W	Spar
Spar_Spar_8:340893-340896	Spar_YHR128W.340893	0	1	0	1	1	0	0	0	1	0	YHR128W	Spar
Spar_Spar_8:353247-353250	Spar_YHR135C.353250	1	0	0	0	0	1	1	1	0	1	YHR135C	Spar
Spar_Spar_8:362275-362278	Spar_YHR142W.362275	0	1	0	1	1	0	0	0	0	1	YHR142W	Spar
Spar_Spar_8:362321-362324	Spar_YHR142W.362321	0	1	1	0	0	1	0	1	0	1	YHR142W	Spar
Spar_Spar_8:375202-375205	Spar_YHR149C.375205	0	1	0	1	1	0	0	0	0	1	YHR149C	Spar
Spar_Spar_8:375245-375248	Spar_YHR149C.375248	0	1	1	0	1	0	0	0	0	1	YHR149C	Spar
Spar_Spar_8:379469-379472	Spar_YHR151C.379472	0	1	0	1	1	0	0	0	0	1	YHR151C	Spar
Spar_Spar_8:379893-379896	Spar_YHR152W.379893	0	1	1	0	0	1	1	1	1	0	YHR152W	Spar
Spar_Spar_8:401416-401419	Spar_YHR162W.401416	0	1	1	0	1	0	0	0	0	1	YHR162W	Spar
Spar_Spar_8:401438-401441	Spar_YHR162W.401438	0	1	0	1	1	0	0	0	0	1	YHR162W	Spar
Spar_Spar_8:401504-401507	Spar_YHR162W.401504	0	1	1	0	0	1	0	1	0	1	YHR162W	Spar
Spar_Spar_8:422293-422296	Spar_YHR170W.422293	0	1	1	0	1	0	0	0	0	1	YHR170W	Spar
Spar_Spar_8:431262-431265	Spar_YHR175W.431262	0	1	0	1	1	0	0	0	1	0	YHR175W	Spar
Spar_Spar_8:450805-450808	Spar_YHR183W.450805	0	1	1	0	0	1	1	1	0	1	YHR183W	Spar
Spar_Spar_8:485419-485422	Spar_YHR203C.485422	0	1	0	1	1	0	0	0	0	1	YHR203C	Spar
Spar_Spar_8:488851-488854	Spar_YHR205W.488851	0	1	0	1	1	0	0	1	0	1	YHR205W	Spar
Spar_Spar_8:488989-488992	Spar_YHR205W.488989	0	1	1	0	1	0	0	0	0	1	YHR205W	Spar
Spar_Spar_8:489086-489089	Spar_YHR205W.489086	0	1	0	1	1	0	0	1	0	1	YHR205W	Spar
Spar_Spar_8:492390-492393	Spar_YHR206W.492390	0	1	0	1	1	0	0	0	0	1	YHR206W	Spar
Spar_Spar_8:492477-492480	Spar_YHR206W.492477	0	1	0	1	1	0	0	1	0	1	YHR206W	Spar
Spar_Spar_8:492517-492520	Spar_YHR206W.492517	0	1	0	1	0	1	1	1	0	1	YHR206W	Spar
Spar_Spar_8:492568-492571	Spar_YHR206W.492568	0	1	1	0	1	0	0	0	0	1	YHR206W	Spar
Spar_Spar_9:329646-329649	Spar_YIL002C.329649	1	0	0	0	1	0	0	1	0	1	YIL002C	Spar
Spar_Spar_9:324399-324402	Spar_YIL004C.324402	0	1	0	1	1	0	0	0	0	1	YIL004C	Spar
Spar_Spar_9:324435-324438	Spar_YIL004C.324438	1	0	0	0	1	0	0	0	0	1	YIL004C	Spar
Spar_Spar_9:324455-324458	Spar_YIL004C.324458	0	1	0	1	1	0	0	0	0	1	YIL004C	Spar
Spar_Spar_9:324476-324479	Spar_YIL004C.324479	0	1	0	1	1	0	0	0	0	1	YIL004C	Spar
Spar_Spar_9:324527-324530	Spar_YIL004C.324530	0	1	0	1	1	0	0	0	0	1	YIL004C	Spar
Spar_Spar_9:324659-324662	Spar_YIL004C.324662	1	0	0	0	1	0	0	0	0	1	YIL004C	Spar
Spar_Spar_9:290033-290036	Spar_YIL020C.290036	0	1	0	1	1	0	0	0	0	1	YIL020C	Spar
Spar_Spar_9:263502-263505	Spar_YIL035C.263505	0	1	1	0	1	0	0	0	0	1	YIL035C	Spar
Spar_Spar_9:257269-257272	Spar_YIL038C.257272	0	1	0	1	1	0	0	0	0	1	YIL038C	Spar
Spar_Spar_9:257335-257338	Spar_YIL038C.257338	0	1	1	0	1	0	0	0	0	1	YIL038C	Spar
Spar_Spar_9:257362-257365	Spar_YIL038C.257365	0	1	0	1	1	0	0	0	0	1	YIL038C	Spar
Spar_Spar_9:257406-257409	Spar_YIL038C.257409	0	1	0	1	1	0	0	0	0	1	YIL038C	Spar
Spar_Spar_9:235832-235835	Spar_YIL048W.235832	0	1	1	0	1	0	0	0	0	1	YIL048W	Spar
Spar_Spar_9:235940-235943	Spar_YIL048W.235940	0	1	0	1	1	0	0	0	0	1	YIL048W	Spar
Spar_Spar_9:231710-231713	Spar_YIL052C.231713	0	1	0	1	1	0	0	0	0	1	YIL052C	Spar
Spar_Spar_9:208105-208108	Spar_YIL070C.208108	0	1	0	1	1	0	0	0	1	0	YIL070C	Spar
Spar_Spar_9:199129-199132	Spar_YIL074C.199132	0	1	0	1	1	0	0	0	0	1	YIL074C	Spar
Spar_Spar_9:199150-199153	Spar_YIL074C.199153	0	1	0	1	1	0	0	0	0	1	YIL074C	Spar
Spar_Spar_9:193038-193041	Spar_YIL077C.193041	1	0	0	0	1	0	0	0	1	0	YIL077C	Spar
Spar_Spar_9:165584-165587	Spar_YIL095W.165584	0	1	0	1	1	0	0	0	0	1	YIL095W	Spar
Spar_Spar_9:165638-165641	Spar_YIL095W.165638	0	1	1	0	1	0	0	0	0	1	YIL095W	Spar
Spar_Spar_9:111204-111207	Spar_YIL122W.111204	0	1	1	0	1	0	0	0	0	1	YIL122W	Spar
Spar_Spar_9:111279-111282	Spar_YIL122W.111279	0	1	1	0	0	1	1	1	0	1	YIL122W	Spar
Spar_Spar_9:103276-103279	Spar_YIL125W.103276	0	1	1	0	0	1	1	1	0	1	YIL125W	Spar
Spar_Spar_10:382921-382924	Spar_YJL026W.382921	0	1	0	1	1	0	0	0	1	0	YJL026W	Spar
Spar_Spar_10:382958-382961	Spar_YJL026W.382958	0	1	0	1	0	1	1	0	0	1	YJL026W	Spar
Spar_Spar_10:371870-371873	Spar_YJL034W.371870	0	1	1	0	1	0	0	0	1	0	YJL034W	Spar
Spar_Spar_10:345679-345682	Spar_YJL039C.345679	0	1	1	0	0	1	0	0	0	1	YJL039C	Spar
Spar_Spar_10:324853-324856	Spar_YJL053W.324853	0	1	0	1	1	0	0	0	0	1	YJL053W	Spar
Spar_Spar_10:278129-278132	Spar_YJL080C.278132	0	1	1	0	0	1	1	1	0	1	YJL080C	Spar
Spar_Spar_10:278156-278159	Spar_YJL080C.278159	0	1	0	1	1	0	0	0	0	1	YJL080C	Spar
Spar_Spar_10:278201-278204	Spar_YJL080C.278204	0	1	0	1	1	0	0	0	0	1	YJL080C	Spar
Spar_Spar_10:278262-278265	Spar_YJL080C.278265	0	1	0	1	1	0	0	0	0	1	YJL080C	Spar
Spar_Spar_10:278281-278284	Spar_YJL080C.278284	0	1	0	1	1	0	0	0	1	0	YJL080C	Spar
Spar_Spar_10:230863-230866	Spar_YJL098W.230863	1	0	0	0	0	1	0	1	0	1	YJL098W	Spar
Spar_Spar_10:230903-230906	Spar_YJL098W.230903	0	1	1	0	1	0	0	0	0	1	YJL098W	Spar
Spar_Spar_10:225326-225329	Spar_YJL101C.225329	0	1	0	1	1	0	0	0	0	1	YJL101C	Spar
Spar_Spar_10:180589-180592	Spar_YJL124C.180592	0	1	0	1	0	1	0	0	0	1	YJL124C	Spar
Spar_Spar_10:180670-180673	Spar_YJL124C.180673	0	1	1	0	1	0	0	0	0	1	YJL124C	Spar
Spar_Spar_10:171948-171951	Spar_YJL128C.171951	0	1	0	1	1	0	0	1	0	1	YJL128C	Spar
Spar_Spar_10:169240-169243	Spar_YJL129C.169243	0	1	0	1	1	0	0	0	0	1	YJL129C	Spar
Spar_Spar_10:169266-169269	Spar_YJL129C.169269	0	1	0	1	1	0	0	0	0	1	YJL129C	Spar
Spar_Spar_10:169368-169371	Spar_YJL129C.169371	0	1	1	0	1	0	0	0	0	1	YJL129C	Spar
Spar_Spar_10:164249-164252	Spar_YJL130C.164252	0	1	0	1	1	0	0	0	0	1	YJL130C	Spar
Spar_Spar_10:164308-164311	Spar_YJL130C.164311	0	1	0	1	1	0	0	0	0	1	YJL130C	Spar
Spar_Spar_10:164448-164451	Spar_YJL130C.164451	1	0	0	0	1	0	0	0	0	1	YJL130C	Spar
Spar_Spar_10:164498-164501	Spar_YJL130C.164501	1	0	0	0	1	0	0	0	0	1	YJL130C	Spar
Spar_Spar_10:164654-164657	Spar_YJL130C.164657	0	1	1	0	1	0	0	0	0	1	YJL130C	Spar
Spar_Spar_10:164679-164682	Spar_YJL130C.164682	0	1	1	0	1	0	0	0	0	1	YJL130C	Spar
Spar_Spar_10:152394-152397	Spar_YJL133W.152394	0	1	0	1	1	0	0	0	0	1	YJL133W	Spar
Spar_Spar_10:152435-152438	Spar_YJL133W.152435	1	0	0	0	0	1	1	1	0	1	YJL133W	Spar
Spar_Spar_10:146626-146629	Spar_YJL138C.146629	0	1	0	1	0	1	0	0	0	1	YJL138C	Spar
Spar_Spar_10:144948-144951	Spar_YJL139C.144951	1	0	0	0	0	1	1	1	0	1	YJL139C	Spar
Spar_Spar_10:142839-142842	Spar_YJL140W.142839	0	1	0	1	1	0	0	0	0	1	YJL140W	Spar
Spar_Spar_10:114951-114954	Spar_YJL158C.114954	0	1	0	1	1	0	0	0	0	1	YJL158C	Spar
Spar_Spar_10:112443-112446	Spar_YJL159W.112443	0	1	0	1	0	1	1	1	0	1	YJL159W	Spar
Spar_Spar_10:112463-112466	Spar_YJL159W.112463	0	1	0	1	1	0	0	0	0	1	YJL159W	Spar
Spar_Spar_10:96562-96565	Spar_YJL167W.96562	0	1	1	0	1	0	0	0	0	1	YJL167W	Spar
Spar_Spar_10:86546-86549	Spar_YJL174W.86546	0	1	1	0	1	0	0	0	0	1	YJL174W	Spar
Spar_Spar_10:86611-86614	Spar_YJL174W.86611	0	1	0	1	1	0	0	1	0	1	YJL174W	Spar
Spar_Spar_10:82280-82283	Spar_YJL177W.82280	0	1	1	0	1	0	0	0	1	0	YJL177W	Spar
Spar_Spar_10:82301-82304	Spar_YJL177W.82301	0	1	1	0	1	0	0	0	1	0	YJL177W	Spar
Spar_Spar_10:75615-75618	Spar_YJL183W.75615	0	1	0	1	1	0	0	0	0	1	YJL183W	Spar
Spar_Spar_10:441762-441765	Spar_YJR007W.441762	0	1	0	1	0	1	1	0	0	1	YJR007W	Spar
Spar_Spar_10:445461-445464	Spar_YJR009C.445464	0	1	0	1	1	0	0	0	0	1	YJR009C	Spar
Spar_Spar_10:497464-497467	Spar_YJR045C.497467	0	1	0	1	0	1	1	1	0	1	YJR045C	Spar
Spar_Spar_10:497514-497517	Spar_YJR045C.497517	0	1	0	1	1	0	1	0	0	1	YJR045C	Spar
Spar_Spar_10:502255-502258	Spar_YJR048W.502255	0	1	0	1	1	0	0	0	0	1	YJR048W	Spar
Spar_Spar_10:519112-519115	Spar_YJR056C.519115	0	1	0	1	1	0	0	0	0	1	YJR056C	Spar
Spar_Spar_10:519170-519173	Spar_YJR056C.519173	0	1	1	0	1	0	0	0	0	1	YJR056C	Spar
Spar_Spar_10:524904-524907	Spar_YJR060W.524904	0	1	0	1	1	0	0	0	0	1	YJR060W	Spar
Spar_Spar_10:524917-524920	Spar_YJR060W.524917	0	1	0	1	1	0	0	0	0	1	YJR060W	Spar
Spar_Spar_10:570599-570602	Spar_YJR090C.570602	0	1	0	1	1	0	0	0	0	1	YJR090C	Spar
Spar_Spar_10:570723-570726	Spar_YJR090C.570726	0	1	0	1	1	0	0	0	0	1	YJR090C	Spar
Spar_Spar_10:626094-626097	Spar_YJR121W.626094	0	1	1	0	1	0	0	0	0	1	YJR121W	Spar
Spar_Spar_10:684245-684248	Spar_YJR148W.684245	0	1	0	1	1	0	0	0	0	1	YJR148W	Spar
Spar_Spar_4:23667-23670	Spar_YJR155W.23670	0	1	0	1	1	0	0	0	0	1	YJR155W	Spar
Spar_Spar_4:23756-23759	Spar_YJR155W.23759	1	0	0	0	1	0	0	0	0	1	YJR155W	Spar
Spar_Spar_4:23873-23876	Spar_YJR155W.23876	0	1	0	1	1	0	0	0	0	1	YJR155W	Spar
Spar_Spar_4:23984-23987	Spar_YJR155W.23987	1	0	0	0	1	0	0	0	1	0	YJR155W	Spar
Spar_Spar_11:450283-450286	Spar_YKL004W.450283	0	1	0	1	1	0	0	0	0	1	YKL004W	Spar
Spar_Spar_11:450367-450370	Spar_YKL004W.450367	0	1	0	1	1	0	0	0	0	1	YKL004W	Spar
Spar_Spar_11:450460-450463	Spar_YKL004W.450460	0	1	0	1	1	0	0	0	0	1	YKL004W	Spar
Spar_Spar_11:423567-423570	Spar_YKL015W.423567	0	1	1	0	1	0	0	0	0	1	YKL015W	Spar
Spar_Spar_11:422968-422971	Spar_YKL016C.422971	0	1	1	0	1	0	0	0	0	1	YKL016C	Spar
Spar_Spar_11:423012-423015	Spar_YKL016C.423015	1	0	0	0	1	0	0	0	1	0	YKL016C	Spar
Spar_Spar_11:400874-400877	Spar_YKL027W.400874	0	1	0	1	1	0	0	0	1	0	YKL027W	Spar
Spar_Spar_11:400927-400930	Spar_YKL027W.400927	0	1	1	0	1	0	0	0	0	1	YKL027W	Spar
Spar_Spar_11:395289-395292	Spar_YKL032C.395292	0	1	0	1	0	1	1	1	0	1	YKL032C	Spar
Spar_Spar_11:383488-383491	Spar_YKL035W.383488	0	1	0	1	1	0	0	0	0	1	YKL035W	Spar
Spar_Spar_11:376163-376166	Spar_YKL039W.376163	0	1	1	0	1	0	0	0	0	1	YKL039W	Spar
Spar_Spar_11:376216-376219	Spar_YKL039W.376216	0	1	1	0	1	0	0	0	0	1	YKL039W	Spar
Spar_Spar_11:373674-373677	Spar_YKL041W.373674	0	1	0	1	1	0	0	0	1	0	YKL041W	Spar
Spar_Spar_11:373720-373723	Spar_YKL041W.373720	0	1	0	1	1	0	0	1	0	1	YKL041W	Spar
Spar_Spar_11:366293-366296	Spar_YKL046C.366296	0	1	0	1	1	0	1	0	0	1	YKL046C	Spar
Spar_Spar_11:354836-354839	Spar_YKL051W.354836	0	1	0	1	1	0	0	0	0	1	YKL051W	Spar
Spar_Spar_11:352398-352401	Spar_YKL054C.352401	0	1	0	1	0	1	1	1	0	1	YKL054C	Spar
Spar_Spar_11:352469-352472	Spar_YKL054C.352472	0	1	0	1	1	0	0	0	1	0	YKL054C	Spar
Spar_Spar_11:347933-347936	Spar_YKL057C.347936	1	0	0	0	1	0	0	0	1	0	YKL057C	Spar
Spar_Spar_11:335112-335115	Spar_YKL063C.335115	0	1	0	1	0	1	0	1	0	1	YKL063C	Spar
Spar_Spar_11:335138-335141	Spar_YKL063C.335141	0	1	0	1	1	0	1	0	0	1	YKL063C	Spar
Spar_Spar_11:331273-331276	Spar_YKL064W.331273	1	0	0	0	0	1	1	0	0	1	YKL064W	Spar
Spar_Spar_11:301847-301850	Spar_YKL077W.301847	0	1	0	1	1	0	0	0	0	1	YKL077W	Spar
Spar_Spar_11:295554-295557	Spar_YKL080W.295554	0	1	0	1	1	0	0	0	0	1	YKL080W	Spar
Spar_Spar_11:289658-289661	Spar_YKL085W.289658	0	1	0	1	1	0	0	0	0	1	YKL085W	Spar
Spar_Spar_11:272696-272699	Spar_YKL095W.272696	0	1	1	0	1	0	0	1	0	1	YKL095W	Spar
Spar_Spar_11:259121-259124	Spar_YKL101W.259121	0	1	0	1	1	0	0	0	0	1	YKL101W	Spar
Spar_Spar_11:259181-259184	Spar_YKL101W.259181	0	1	0	1	1	0	0	0	0	1	YKL101W	Spar
Spar_Spar_11:255886-255889	Spar_YKL104C.255889	0	1	0	1	1	0	1	0	0	1	YKL104C	Spar
Spar_Spar_11:255953-255956	Spar_YKL104C.255956	0	1	1	0	1	0	0	0	0	1	YKL104C	Spar
Spar_Spar_11:253117-253120	Spar_YKL105C.253120	0	1	0	1	1	0	0	0	0	1	YKL105C	Spar
Spar_Spar_11:242448-242451	Spar_YKL109W.242448	1	0	0	0	0	1	1	1	0	1	YKL109W	Spar
Spar_Spar_11:242600-242603	Spar_YKL109W.242600	0	1	0	1	1	0	1	0	0	1	YKL109W	Spar
Spar_Spar_11:242638-242641	Spar_YKL109W.242638	1	0	0	0	0	1	1	1	0	1	YKL109W	Spar
Spar_Spar_11:242651-242654	Spar_YKL109W.242651	0	1	1	0	1	0	0	0	0	1	YKL109W	Spar
Spar_Spar_11:236969-236972	Spar_YKL112W.236969	0	1	0	1	1	0	1	0	0	1	YKL112W	Spar
Spar_Spar_11:236977-236980	Spar_YKL112W.236977	0	1	0	1	1	0	0	0	0	1	YKL112W	Spar
Spar_Spar_11:216564-216567	Spar_YKL126W.216564	0	1	1	0	1	0	0	0	0	1	YKL126W	Spar
Spar_Spar_11:216608-216611	Spar_YKL126W.216608	0	1	1	0	1	0	0	0	0	1	YKL126W	Spar
Spar_Spar_11:216657-216660	Spar_YKL126W.216657	0	1	0	1	1	0	0	0	0	1	YKL126W	Spar
Spar_Spar_11:216728-216731	Spar_YKL126W.216728	0	1	0	1	1	0	0	0	0	1	YKL126W	Spar
Spar_Spar_11:199221-199224	Spar_YKL135C.199224	0	1	0	1	1	0	0	0	0	1	YKL135C	Spar
Spar_Spar_11:196244-196247	Spar_YKL138C.196247	0	1	0	1	1	0	0	0	0	1	YKL138C	Spar
Spar_Spar_11:193431-193434	Spar_YKL139W.193431	0	1	0	1	1	0	1	0	0	1	YKL139W	Spar
Spar_Spar_11:193448-193451	Spar_YKL139W.193448	0	1	0	1	1	0	0	0	0	1	YKL139W	Spar
Spar_Spar_11:168585-168588	Spar_YKL156W.168585	0	1	0	1	1	0	0	0	1	0	YKL156W	Spar
Spar_Spar_11:160596-160599	Spar_YKL161C.160599	0	1	0	1	1	0	0	0	0	1	YKL161C	Spar
Spar_Spar_11:153202-153205	Spar_YKL163W.153202	1	0	0	0	1	0	0	0	1	0	YKL163W	Spar
Spar_Spar_11:153241-153244	Spar_YKL163W.153241	0	1	0	1	1	0	0	0	1	0	YKL163W	Spar
Spar_Spar_11:153263-153266	Spar_YKL163W.153263	1	0	0	0	0	1	1	1	1	0	YKL163W	Spar
Spar_Spar_11:153491-153494	Spar_YKL163W.153491	0	1	0	1	1	0	0	0	1	0	YKL163W	Spar
Spar_Spar_11:153990-153993	Spar_YKL163W.153990	0	1	0	1	1	0	0	0	0	1	YKL163W	Spar
Spar_Spar_11:126570-126573	Spar_YKL176C.126573	0	1	0	1	1	0	0	0	0	1	YKL176C	Spar
Spar_Spar_11:126721-126724	Spar_YKL176C.126724	0	1	0	1	1	0	1	0	0	1	YKL176C	Spar
Spar_Spar_11:115543-115546	Spar_YKL181W.115543	0	1	0	1	1	0	0	1	1	0	YKL181W	Spar
Spar_Spar_11:115639-115642	Spar_YKL181W.115639	0	1	0	1	1	0	0	0	0	1	YKL181W	Spar
Spar_Spar_11:115667-115670	Spar_YKL181W.115667	0	1	0	1	0	1	1	1	0	1	YKL181W	Spar
Spar_Spar_11:115687-115690	Spar_YKL181W.115687	0	1	0	1	0	1	1	1	0	1	YKL181W	Spar
Spar_Spar_11:108621-108624	Spar_YKL182W.108621	0	1	0	1	1	0	0	0	1	0	YKL182W	Spar
Spar_Spar_11:108705-108708	Spar_YKL182W.108705	0	1	0	1	1	0	0	0	1	0	YKL182W	Spar
Spar_Spar_11:108816-108819	Spar_YKL182W.108816	0	1	0	1	0	1	1	1	0	1	YKL182W	Spar
Spar_Spar_11:108953-108956	Spar_YKL182W.108953	1	0	0	0	0	1	1	1	0	1	YKL182W	Spar
Spar_Spar_11:109022-109025	Spar_YKL182W.109022	0	1	0	1	1	0	1	1	0	1	YKL182W	Spar
Spar_Spar_11:107124-107127	Spar_YKL183W.107124	0	1	0	1	1	0	1	0	0	1	YKL183W	Spar
Spar_Spar_11:105178-105181	Spar_YKL184W.105178	0	1	0	1	1	0	1	0	0	1	YKL184W	Spar
Spar_Spar_11:102665-102668	Spar_YKL185W.102665	0	1	1	0	1	0	0	0	0	1	YKL185W	Spar
Spar_Spar_11:102698-102701	Spar_YKL185W.102698	0	1	0	1	1	0	0	0	0	1	YKL185W	Spar
Spar_Spar_11:102747-102750	Spar_YKL185W.102747	0	1	0	1	1	0	0	0	0	1	YKL185W	Spar
Spar_Spar_11:102806-102809	Spar_YKL185W.102806	0	1	1	0	1	0	0	0	0	1	YKL185W	Spar
Spar_Spar_11:102907-102910	Spar_YKL185W.102907	0	1	1	0	1	0	0	0	0	1	YKL185W	Spar
Spar_Spar_11:102942-102945	Spar_YKL185W.102942	0	1	0	1	0	1	0	1	0	1	YKL185W	Spar
Spar_Spar_11:102967-102970	Spar_YKL185W.102967	0	1	0	1	0	1	1	0	0	1	YKL185W	Spar
Spar_Spar_11:91036-91039	Spar_YKL190W.91036	1	0	0	0	0	1	1	1	1	0	YKL190W	Spar
Spar_Spar_11:73960-73963	Spar_YKL198C.73963	0	1	0	1	1	0	0	0	0	1	YKL198C	Spar
Spar_Spar_11:71070-71073	Spar_YKL201C.71073	0	1	1	0	1	0	0	0	0	1	YKL201C	Spar
Spar_Spar_11:71116-71119	Spar_YKL201C.71119	0	1	0	1	1	0	0	0	1	0	YKL201C	Spar
Spar_Spar_11:38010-38013	Spar_YKL212W.38010	0	1	1	0	1	0	0	0	0	1	YKL212W	Spar
Spar_Spar_11:38030-38033	Spar_YKL212W.38030	0	1	1	0	1	0	0	0	0	1	YKL212W	Spar
Spar_Spar_11:9474-9477	Spar_YKL222C.9477	1	0	0	0	1	0	0	0	0	1	YKL222C	Spar
Spar_Spar_11:9546-9549	Spar_YKL222C.9549	1	0	0	0	1	0	0	0	0	1	YKL222C	Spar
Spar_Spar_11:457924-457927	Spar_YKR002W.457924	0	1	0	1	1	0	0	0	0	1	YKR002W	Spar
Spar_Spar_11:458056-458059	Spar_YKR002W.458056	0	1	0	1	1	0	0	0	0	1	YKR002W	Spar
Spar_Spar_11:478403-478406	Spar_YKR011C.478406	1	0	0	0	1	0	0	0	1	0	YKR011C	Spar
Spar_Spar_11:481060-481063	Spar_YKR014C.481063	0	1	1	0	1	0	0	0	0	1	YKR014C	Spar
Spar_Spar_11:504611-504614	Spar_YKR026C.504614	0	1	0	1	0	1	0	0	0	1	YKR026C	Spar
Spar_Spar_11:508763-508766	Spar_YKR028W.508763	0	1	0	1	1	0	0	0	0	1	YKR028W	Spar
Spar_Spar_11:508811-508814	Spar_YKR028W.508811	0	1	1	0	1	0	0	0	0	1	YKR028W	Spar
Spar_Spar_11:508850-508853	Spar_YKR028W.508850	0	1	1	0	1	0	0	0	0	1	YKR028W	Spar
Spar_Spar_11:508907-508910	Spar_YKR028W.508907	0	1	0	1	1	0	1	0	0	1	YKR028W	Spar
Spar_Spar_11:508978-508981	Spar_YKR028W.508978	0	1	0	1	1	0	0	0	0	1	YKR028W	Spar
Spar_Spar_11:533946-533949	Spar_YKR042W.533946	0	1	0	1	1	0	0	0	0	1	YKR042W	Spar
Spar_Spar_11:534031-534034	Spar_YKR042W.534031	0	1	0	1	1	0	0	1	0	1	YKR042W	Spar
Spar_Spar_11:534048-534051	Spar_YKR042W.534048	0	1	0	1	1	0	0	0	0	1	YKR042W	Spar
Spar_Spar_11:534096-534099	Spar_YKR042W.534096	0	1	0	1	1	0	0	0	0	1	YKR042W	Spar
Spar_Spar_11:570109-570112	Spar_YKR060W.570109	1	0	0	0	1	0	0	0	1	0	YKR060W	Spar
Spar_Spar_11:570137-570140	Spar_YKR060W.570137	0	1	0	1	1	0	0	0	1	0	YKR060W	Spar
Spar_Spar_11:570176-570179	Spar_YKR060W.570176	0	1	0	1	1	0	0	0	1	0	YKR060W	Spar
Spar_Spar_11:570227-570230	Spar_YKR060W.570227	0	1	0	1	1	0	0	0	1	0	YKR060W	Spar
Spar_Spar_11:570274-570277	Spar_YKR060W.570274	0	1	0	1	1	0	0	0	1	0	YKR060W	Spar
Spar_Spar_11:570352-570355	Spar_YKR060W.570352	0	1	0	1	1	0	0	0	1	0	YKR060W	Spar
Spar_Spar_11:570382-570385	Spar_YKR060W.570382	0	1	0	1	1	0	0	0	1	0	YKR060W	Spar
Spar_Spar_11:570584-570587	Spar_YKR060W.570584	0	1	0	1	1	0	0	0	0	1	YKR060W	Spar
Spar_Spar_11:570999-571002	Spar_YKR060W.570999	0	1	1	0	1	0	0	0	0	1	YKR060W	Spar
Spar_Spar_11:585938-585941	Spar_YKR069W.585938	1	0	0	0	1	0	0	0	0	1	YKR069W	Spar
Spar_Spar_11:603739-603742	Spar_YKR079C.603742	0	1	0	1	1	0	0	1	0	1	YKR079C	Spar
Spar_Spar_11:603773-603776	Spar_YKR079C.603776	0	1	0	1	1	0	0	0	0	1	YKR079C	Spar
Spar_Spar_11:624119-624122	Spar_YKR090W.624119	0	1	1	0	1	0	0	0	0	1	YKR090W	Spar
Spar_Spar_11:626722-626725	Spar_YKR091W.626722	0	1	1	0	0	1	0	1	1	0	YKR091W	Spar
Spar_Spar_11:630874-630877	Spar_YKR093W.630874	0	1	1	0	1	0	0	0	1	0	YKR093W	Spar
Spar_Spar_11:630992-630995	Spar_YKR093W.630992	0	1	0	1	1	0	0	1	0	1	YKR093W	Spar
Spar_Spar_11:641941-641944	Spar_YKR096W.641941	0	1	0	1	1	0	0	0	0	1	YKR096W	Spar
Spar_Spar_11:650915-650918	Spar_YKR099W.650915	0	1	0	1	1	0	0	0	0	1	YKR099W	Spar
Spar_Spar_11:655335-655338	Spar_YKR100C.655338	0	1	1	0	1	0	0	0	0	1	YKR100C	Spar
Spar_Spar_11:655379-655382	Spar_YKR100C.655382	0	1	1	0	1	0	0	0	0	1	YKR100C	Spar
Spar_Spar_12:118223-118226	Spar_YLL010C.118226	0	1	0	1	1	0	0	0	0	1	YLL010C	Spar
Spar_Spar_12:118308-118311	Spar_YLL010C.118311	0	1	0	1	1	0	0	0	0	1	YLL010C	Spar
Spar_Spar_12:118331-118334	Spar_YLL010C.118334	0	1	1	0	1	0	0	0	0	1	YLL010C	Spar
Spar_Spar_12:112442-112445	Spar_YLL013C.112445	0	1	0	1	1	0	0	0	0	1	YLL013C	Spar
Spar_Spar_12:112464-112467	Spar_YLL013C.112467	0	1	0	1	1	0	0	0	0	1	YLL013C	Spar
Spar_Spar_12:112605-112608	Spar_YLL013C.112608	0	1	0	1	1	0	0	0	0	1	YLL013C	Spar
Spar_Spar_12:104085-104088	Spar_YLL015W.104085	0	1	0	1	1	0	0	0	0	1	YLL015W	Spar
Spar_Spar_12:75827-75830	Spar_YLL026W.75827	0	1	0	1	1	0	0	0	0	1	YLL026W	Spar
Spar_Spar_12:74445-74448	Spar_YLL027W.74445	1	0	0	0	0	1	1	0	0	1	YLL027W	Spar
Spar_Spar_12:74579-74582	Spar_YLL027W.74579	0	1	0	1	1	0	0	1	0	1	YLL027W	Spar
Spar_Spar_12:33315-33318	Spar_YLL048C.33318	0	1	0	1	1	0	0	0	0	1	YLL048C	Spar
Spar_Spar_12:33379-33382	Spar_YLL048C.33382	0	1	1	0	1	0	1	0	0	1	YLL048C	Spar
Spar_Spar_12:33490-33493	Spar_YLL048C.33493	0	1	0	1	1	0	0	0	0	1	YLL048C	Spar
Spar_Spar_12:26513-26516	Spar_YLL051C.26516	1	0	0	0	1	0	0	0	0	1	YLL051C	Spar
Spar_Spar_12:26544-26547	Spar_YLL051C.26547	1	0	0	0	0	1	1	1	1	0	YLL051C	Spar
Spar_Spar_12:26797-26800	Spar_YLL051C.26800	0	1	0	1	1	0	0	0	1	0	YLL051C	Spar
Spar_Spar_12:23033-23036	Spar_YLL053C.23036	0	1	0	1	1	0	0	0	0	1	YLL053C	Spar
Spar_Spar_12:23126-23129	Spar_YLL053C.23129	0	1	0	1	0	1	1	0	0	1	YLL053C	Spar
Spar_Spar_12:23174-23177	Spar_YLL053C.23177	1	0	0	0	1	0	1	0	0	1	YLL053C	Spar
Spar_Spar_12:23303-23306	Spar_YLL053C.23306	0	1	0	1	1	0	0	0	0	1	YLL053C	Spar
Spar_Spar_12:151942-151945	Spar_YLR006C.151945	0	1	0	1	1	0	0	0	0	1	YLR006C	Spar
Spar_Spar_12:154421-154424	Spar_YLR009W.154421	0	1	1	0	1	0	0	1	0	1	YLR009W	Spar
Spar_Spar_12:154502-154505	Spar_YLR009W.154502	0	1	0	1	0	1	0	1	0	1	YLR009W	Spar
Spar_Spar_12:165624-165627	Spar_YLR016C.165627	0	1	0	1	1	0	0	0	1	0	YLR016C	Spar
Spar_Spar_12:165644-165647	Spar_YLR016C.165647	0	1	0	1	1	0	0	0	1	0	YLR016C	Spar
Spar_Spar_12:168316-168319	Spar_YLR019W.168316	0	1	1	0	1	0	0	0	0	1	YLR019W	Spar
Spar_Spar_12:168400-168403	Spar_YLR019W.168400	0	1	1	0	0	1	0	0	0	1	YLR019W	Spar
Spar_Spar_12:168433-168436	Spar_YLR019W.168433	0	1	0	1	1	0	0	0	0	1	YLR019W	Spar
Spar_Spar_12:189499-189502	Spar_YLR028C.189502	0	1	0	1	1	0	0	0	0	1	YLR028C	Spar
Spar_Spar_12:189591-189594	Spar_YLR028C.189594	0	1	1	0	1	0	0	0	0	1	YLR028C	Spar
Spar_Spar_12:190076-190079	Spar_YLR028C.190079	0	1	0	1	1	0	0	0	1	0	YLR028C	Spar
Spar_Spar_12:190112-190115	Spar_YLR028C.190115	0	1	1	0	1	0	0	0	1	0	YLR028C	Spar
Spar_Spar_12:200171-200174	Spar_YLR034C.200174	0	1	1	0	1	0	0	0	0	1	YLR034C	Spar
Spar_Spar_12:241729-241732	Spar_YLR058C.241732	0	1	0	1	1	0	0	0	0	1	YLR058C	Spar
Spar_Spar_12:264069-264072	Spar_YLR073C.264072	1	0	0	0	0	1	1	1	1	0	YLR073C	Spar
Spar_Spar_12:302296-302299	Spar_YLR089C.302299	0	1	1	0	1	0	1	0	0	1	YLR089C	Spar
Spar_Spar_12:302365-302368	Spar_YLR089C.302368	0	1	1	0	1	0	0	0	0	1	YLR089C	Spar
Spar_Spar_12:302492-302495	Spar_YLR089C.302495	0	1	0	1	0	1	1	1	0	1	YLR089C	Spar
Spar_Spar_12:302580-302583	Spar_YLR089C.302583	0	1	1	0	1	0	0	0	0	1	YLR089C	Spar
Spar_Spar_12:353782-353785	Spar_YLR113W.353782	0	1	0	1	0	1	1	1	0	1	YLR113W	Spar
Spar_Spar_12:371284-371287	Spar_YLR120C.371287	0	1	1	0	0	1	1	1	0	1	YLR120C	Spar
Spar_Spar_12:371317-371320	Spar_YLR120C.371320	0	1	0	1	1	0	0	0	0	1	YLR120C	Spar
Spar_Spar_12:381996-381999	Spar_YLR128W.381996	0	1	0	1	1	0	0	0	0	1	YLR128W	Spar
Spar_Spar_12:382079-382082	Spar_YLR128W.382079	0	1	0	1	1	0	0	1	0	1	YLR128W	Spar
Spar_Spar_12:387362-387365	Spar_YLR130C.387365	0	1	0	1	1	0	0	0	0	1	YLR130C	Spar
Spar_Spar_12:387398-387401	Spar_YLR130C.387401	0	1	0	1	1	0	0	0	0	1	YLR130C	Spar
Spar_Spar_12:393846-393849	Spar_YLR134W.393846	1	0	0	0	1	0	0	0	1	0	YLR134W	Spar
Spar_Spar_12:423770-423773	Spar_YLR150W.423770	0	1	0	1	0	1	1	1	1	0	YLR150W	Spar
Spar_Spar_12:423796-423799	Spar_YLR150W.423796	0	1	0	1	1	0	0	1	0	1	YLR150W	Spar
Spar_Spar_12:464034-464037	Spar_YLR167W.464034	0	1	0	1	0	1	1	1	0	1	YLR167W	Spar
Spar_Spar_12:464067-464070	Spar_YLR167W.464067	0	1	0	1	1	0	0	0	0	1	YLR167W	Spar
Spar_Spar_12:479038-479041	Spar_YLR178C.479041	1	0	0	0	1	0	0	0	0	1	YLR178C	Spar
Spar_Spar_12:479218-479221	Spar_YLR178C.479221	0	1	0	1	1	0	0	0	1	0	YLR178C	Spar
Spar_Spar_12:479939-479942	Spar_YLR179C.479942	0	1	0	1	1	0	0	0	0	1	YLR179C	Spar
Spar_Spar_12:479985-479988	Spar_YLR179C.479988	0	1	1	0	1	0	0	0	1	0	YLR179C	Spar
Spar_Spar_12:480038-480041	Spar_YLR179C.480041	0	1	0	1	1	0	0	0	1	0	YLR179C	Spar
Spar_Spar_12:480466-480469	Spar_YLR180W.480466	0	1	0	1	1	0	0	0	0	1	YLR180W	Spar
Spar_Spar_12:493500-493503	Spar_YLR188W.493500	1	0	0	0	0	1	1	1	0	1	YLR188W	Spar
Spar_Spar_12:499991-499994	Spar_YLR190W.499991	1	0	0	0	1	0	0	0	1	0	YLR190W	Spar
Spar_Spar_12:500126-500129	Spar_YLR190W.500126	0	1	0	1	1	0	0	0	0	1	YLR190W	Spar
Spar_Spar_12:500295-500298	Spar_YLR190W.500295	0	1	1	0	1	0	1	0	0	1	YLR190W	Spar
[truncated: 2,277 more rows]
