# Supplementary material for: Conserved non-AUG uORFs revealed by a novel regression analysis of ribosome profiling data
Source: Genome Res. 2018 Feb;28(2):214–22. doi: 10.1101/gr.221507.117 (PMC5793785; doi:10.1101/gr.221507.117)
Supplement: Supplemental Material [file supp_gr.221507.117_Supplemental_Table_S7.xlsx]

## Sheet: Sequence conserved homologs
S.uvarum	S. cerevisiae	S.paradoxus
suva=YMR205C.655195(TTG)	scer=YMR205C.674790(TTG)	spar=YMR205C.658181(TTG)
suva=YJL139C.397049(ATG)	scer=YJL139C.153053(ATG)	spar=YJL139C.144951(ATG)
suva=YGL135W.250754(TTG)	scer=YGL135W.254614(TTG)	spar=YGL135W.253853(TTG)
suva=YEL020C-B.111172(GTG)	scer=YEL020C-B.117726(GTG)	spar=YEL020C-B.96157(GTG)
suva=YNL064C.506156(ATA)	scer=YNL064C.507169(TTG)	spar=YNL064C.492721(TTG)
suva=YNL288W.87018(TTG)	scer=YNL288W.90250(TTG)	spar=YNL288W.77753(GTG)
suva=YLR188W.500919(ATT)	scer=YLR188W.528246(ATG)	spar=YLR188W.493500(ATG)
suva=YNL186W.285486(ATG)	scer=YNL186W.289370(ATG)	spar=YNL186W.273649(ATG)
suva=YDR045C.347514(ATG)	scer=YDR045C.548370(ATG)	spar=YDR045C.546868(ATG)
suva=YDR346C.925730(ATT)	scer=YDR346C.1168712(TTG)	spar=YDR346C.1013029(ATT)
suva=YLL027W.91517(ATG)	scer=YLL027W.87215(ATG)	spar=YLL027W.74445(ATG)
suva=YPL016W.523920(CTG)	scer=YPL016W.520728(TTG)	spar=YPL016W.540195(TTG)
suva=YFR049W.11067(ATT)	scer=YFR049W.248431(ATT)	spar=YFR049W.275303(ATT)
suva=YER148W.435249(CTG)	scer=YER148W.465139(CTG)	spar=YER148W.470720(TTG)
suva=YPR165W.859738(TTG)	scer=YPR165W.875304(CTG)	spar=YPR165W.875243(TTG)
suva=YDL081C.299555(TTG)	scer=YDL081C.310172(TTG)	spar=YDL081C.315029(TTG)
suva=YOR342C.709378(ATG)	scer=YOR342C.967716(ATG)	spar=YOR342C.909486(ATG)
suva=YEL013W.100357(TTG)	scer=YEL013W.128688(TTG)	spar=YEL013W.107298(CTG)
suva=YEL013W.100261(CTG)	scer=YEL013W.128787(GTG)	spar=YEL013W.107410(CTG)
suva=YNL094W.446007(ATG)	scer=YNL094W.447456(ATG)	spar=YNL094W.432886(ATG)
suva=YPL145C.289100(CTG)	scer=YPL145C.279869(TTG)	spar=YPL145C.304956(TTG)
suva=YEL026W.75674(TTG)	scer=YEL026W.101901(TTG)	spar=YEL026W.80276(TTG)
suva=YMR145C.536013(ATG)	scer=YMR145C.556639(ATG)	spar=YMR145C.535876(ATG)
suva=YDR381W.987313(ATA)	scer=YDR381W.1236540(ATA)	spar=YDR381W.951099(ATA)
suva=YMR239C.731287(ATG)	scer=YMR239C.749729(ATG)	spar=YMR239C.697872(ATG)
suva=YBL099W.33109(TTG)	scer=YBL099W.36818(TTG)	spar=YBL099W.32119(TTG)
suva=YLR073C.283309(ATG)	scer=YLR073C.281761(ATG)	spar=YLR073C.264072(ATG)
suva=YJL133W.389477(ATG)	scer=YJL133W.160595(ATG)	spar=YJL133W.152435(ATG)
suva=YHR030C.377683(TTG)	scer=YHR030C.170400(TTG)	spar=YHR030C.148748(TTG)
suva=YEL034W.61066(ATA)	scer=YEL034W.85656(ATA)	spar=YEL034W.63516(ATA)
suva=YDL028C.393806(ATG)	scer=YDL028C.403308(ATG)	spar=YDL028C.412002(ATG)
suva=YDL134C.210096(ATC)	scer=YDL134C.221683(ATT)	spar=YDL134C.226560(ATT)
suva=YPL179W.217854(ATT)	scer=YPL179W.208128(TTG)	spar=YPL179W.233584(ATT)
suva=YJR007W.134016(GTG)	scer=YJR007W.450972(TTG)	spar=YJR007W.441762(GTG)
suva=YNL098C.438044(ATC)	scer=YNL098C.440596(TTG)	spar=YNL098C.425176(TTG)
suva=YCR024C-A.77161(TTG)	scer=YCR024C-A.163131(TTG)	spar=YCR024C-A.146771(TTG)
suva=YJL080C.262489(ATA)	scer=YJL080C.289282(TTG)	spar=YJL080C.278132(TTG)
suva=YMR234W.721559(ATG)	scer=YMR234W.740184(ATG)	spar=YMR234W.687834(ATG)
suva=YKL109W.218180(ATA)	scer=YKL109W.231977(ATG)	spar=YKL109W.242448(ATG)
suva=YDR293C.814180(TTG)	scer=YDR293C.1049421(TTG)	spar=YDR293C.1093685(ATT)
suva=YER159C.464426(ATG)	scer=YER159C.492120(ATG)	spar=YER159C.498785(ATG)
suva=YEL009C.115297(ATG)	scer=YEL009C.139939(ATG)	spar=YEL009C.130034(ATG)
suva=YEL009C.115269(ATG)	scer=YEL009C.139914(ATG)	spar=YEL009C.130005(ATG)
suva=YEL009C.115488(ATG)	scer=YEL009C.140124(ATG)	spar=YEL009C.130219(ATG)
suva=YLR378C.842867(CTG)	scer=YLR378C.877260(TTG)	spar=YLR378C.831939(TTG)
suva=YNR055C.715138(ATG)	scer=YNR055C.730401(ATG)	spar=YNR055C.707163(ATG)
suva=YDL141W.190889(ATA)	scer=YDL141W.203018(ATT)	spar=YDL141W.207336(ATT)
suva=YHR051W.413294(ATT)	scer=YHR051W.209669(TTG)	spar=YHR051W.187485(TTG)
suva=YEL036C.59986(ATG)	scer=YEL036C.84572(ATG)	spar=YEL036C.62428(ATG)
suva=YDR074W.394014(ATT)	scer=YDR074W.593866(CTG)	spar=YDR074W.592680(TTG)
suva=YOR153W.368845(ATT)	scer=YOR153W.619756(TTG)	spar=YOR153W.566183(TTG)
suva=YHR162W.626939(TTG)	scer=YHR162W.423015(TTG)	spar=YHR162W.401504(TTG)
suva=YDR280W.785649(TTG)	scer=YDR280W.1020714(TTG)	spar=YDR280W.1065211(TTG)
suva=YLR256W.613347(TTG)	scer=YLR256W.646293(TTG)	spar=YLR256W.605800(TTG)
suva=YGR240C.928264(ATT)	scer=YGR240C.973781(TTG)	spar=YGR240C.939079(TTG)
suva=YKL183W.83410(ATT)	scer=YKL183W.98665(GTG)	spar=NA(NA)
suva=YEL020C-B.110807(GTG)	scer=YEL020C-B.118110(TTG)	spar=NA(NA)
suva=YGL006W.477376(ATG)	scer=YGL006W.485776(ATG)	spar=NA(NA)
suva=YDR380W.984935(ATA)	scer=YDR380W.1234194(ATA)	spar=NA(NA)
suva=YDR346C.925730(ATT)	scer=YDR346C.1168712(TTG)	spar=NA(NA)
suva=YKR042W.502628(GTG)	scer=YKR042W.519399(GTG)	spar=NA(NA)
suva=YER091C.315711(TTG)	scer=YER091C.342222(TTG)	spar=NA(NA)
suva=YMR241W.733511(CTG)	scer=YMR241W.751918(TTG)	spar=NA(NA)
suva=YBR154C.718309(ATA)	scer=YBR154C.549047(ATT)	spar=NA(NA)
suva=YBR086C.592019(TTG)	scer=YBR086C.423103(ATG)	spar=NA(NA)
suva=YPR165W.859738(TTG)	scer=YPR165W.875304(CTG)	spar=NA(NA)
suva=YKL198C.54601(ATG)	scer=YKL198C.70323(ATG)	spar=NA(NA)
suva=YCR045W-A.121656(GTG)	scer=YCR045W-A.208297(ATG)	spar=NA(NA)
suva=YOR118W.304447(ATG)	scer=YOR118W.546671(ATG)	spar=NA(NA)
suva=YIL038C.271316(ATG)	scer=YIL038C.282669(ATG)	spar=NA(NA)
suva=YDL160C.159857(TTG)	scer=YDL160C.172100(TTG)	spar=NA(NA)
suva=YDL160C.159737(ATA)	scer=YDL160C.171977(ATA)	spar=NA(NA)
suva=YML016C.231974(TTG)	scer=YML016C.241591(TTG)	spar=NA(NA)
suva=YDR441C.1096966(GTG)	scer=YDR441C.1345093(ATG)	spar=NA(NA)
suva=YPL023C.509582(TTG)	scer=YPL023C.506377(TTG)	spar=NA(NA)
suva=YER090W.311379(CTG)	scer=YER090W.337918(CTG)	spar=NA(NA)
suva=YAL002W.120642(ATA)	scer=YAL002W.143604(ATG)	spar=NA(NA)
suva=YPL154C.270133(ATT)	scer=YPL154C.260981(GTG)	spar=NA(NA)
suva=YNL090W.455224(TTG)	scer=YNL090W.456529(ACG)	spar=NA(NA)
suva=YDR028C.312028(ATT)	scer=YDR028C.500910(TTG)	spar=NA(NA)
suva=YPL164C.250673(ATG)	scer=YPL164C.241528(ATG)	spar=NA(NA)
suva=YNL053W.522486(ATG)	scer=YNL053W.529838(ATG)	spar=NA(NA)
suva=YBL099W.33294(ATC)	scer=YBL099W.36980(TTG)	spar=NA(NA)
suva=YER129W.391557(ATG)	scer=YER129W.417164(ATG)	spar=NA(NA)
suva=YDL138W.201591(ATG)	scer=YDL138W.213324(ATG)	spar=NA(NA)
suva=YDR382W.990399(CTG)	scer=YDR382W.1239443(CTG)	spar=NA(NA)
suva=YGL090W.336001(ATG)	scer=YGL090W.343295(ATG)	spar=NA(NA)
suva=YDL176W.129225(ATG)	scer=YDL176W.141993(ATG)	spar=NA(NA)
suva=YML023C.218968(GTG)	scer=YML023C.228690(ATG)	spar=NA(NA)
suva=YDR372C.972828(ATT)	scer=YDR372C.1222211(TTG)	spar=NA(NA)
suva=YIL048W.250234(GTG)	scer=YIL048W.261410(GTG)	spar=NA(NA)
suva=YOR043W.173612(TTG)	scer=YOR043W.410841(TTG)	spar=NA(NA)
suva=YJL124C.362183(TTG)	scer=YJL124C.187705(TTG)	spar=NA(NA)
suva=YIL109C.155000(TTG)	scer=YIL109C.160207(TTG)	spar=NA(NA)
suva=YNL098C.438044(ATC)	scer=YNL098C.440596(TTG)	spar=NA(NA)
suva=YNL037C.546392(ATT)	scer=YNL037C.559076(CTG)	spar=NA(NA)
suva=YGL123W.273755(GTG)	scer=YGL123W.277565(GTG)	spar=NA(NA)
suva=YOR061W.204358(CTG)	scer=YOR061W.441475(TTG)	spar=NA(NA)
suva=YBR168W.741749(ATG)	scer=YBR168W.572266(ATG)	spar=NA(NA)
suva=YBR168W.741553(ATG)	scer=YBR168W.572066(ATG)	spar=NA(NA)
suva=YLR340W.766904(CTG)	scer=YLR340W.805848(CTG)	spar=NA(NA)
suva=YDR387C.1000942(ATA)	scer=YDR387C.1249900(ATG)	spar=NA(NA)
suva=YLR353W.793845(ATT)	scer=YLR353W.834294(TTG)	spar=NA(NA)
suva=YDL145C.186049(ATT)	scer=YDL145C.198201(TTG)	spar=NA(NA)
suva=YDR352W.938586(ATA)	scer=YDR352W.1181754(TTG)	spar=NA(NA)
suva=YHR050W.411209(ACG)	scer=YHR050W.207585(TTG)	spar=NA(NA)
suva=YDR148C.550615(ACG)	scer=YDR148C.755108(TTG)	spar=NA(NA)
suva=YLR328W.746071(ATA)	scer=YLR328W.784823(ATG)	spar=NA(NA)
suva=YBR160W.729441(ATA)	scer=NA(NA)	spar=YBR160W.532683(ATA)
suva=YLR089C.325054(GTG)	scer=NA(NA)	spar=YLR089C.302495(GTG)
suva=YMR148W.539662(TTG)	scer=NA(NA)	spar=YMR148W.539568(TTG)
suva=YDR099W.447719(ATA)	scer=NA(NA)	spar=YDR099W.646041(ATC)
suva=YBR121C.652279(ATT)	scer=NA(NA)	spar=YBR121C.456005(ATT)
suva=YBR121C.652255(ATC)	scer=NA(NA)	spar=YBR121C.455981(ATC)
suva=YEL020C-B.111206(ATA)	scer=NA(NA)	spar=YEL020C-B.96139(ATT)
suva=YDR046C.349761(ATG)	scer=NA(NA)	spar=YDR046C.549120(ATG)
suva=YLR220W.549057(ATT)	scer=NA(NA)	spar=YLR220W.542077(CTG)
suva=YOR350C.730603(ATC)	scer=NA(NA)	spar=YOR350C.931754(ATA)
suva=YCR012W.51480(ATC)	scer=NA(NA)	spar=YCR012W.120692(ATC)
suva=YHR039C.394208(ATC)	scer=NA(NA)	spar=YHR039C.165187(ACG)
suva=YOR322C.661728(ATT)	scer=NA(NA)	spar=YOR322C.862847(TTG)
suva=YOR245C.534400(ATA)	scer=NA(NA)	spar=YOR245C.736112(ATA)
suva=YHR206W.719339(TTG)	scer=NA(NA)	spar=YHR206W.492517(CTG)
suva=YMR305C.863113(ACG)	scer=NA(NA)	spar=YMR305C.828512(CTG)
suva=YGR191W.836772(CTG)	scer=NA(NA)	spar=YGR191W.846173(CTG)
suva=YDL003W.441838(ATA)	scer=NA(NA)	spar=YDL003W.452626(TTG)
suva=YOL136C.46585(GTG)	scer=NA(NA)	spar=YOL136C.57996(ATA)
suva=YLR287C.673544(ATG)	scer=NA(NA)	spar=YLR287C.666249(ATG)
suva=YNL190W.278304(TTG)	scer=NA(NA)	spar=YNL190W.266478(TTG)
suva=YNL190W.278270(ATC)	scer=NA(NA)	spar=YNL190W.266445(ATC)
suva=YFR049W.11014(ATA)	scer=NA(NA)	spar=YFR049W.275356(ATA)
suva=YLR342W.771086(TTG)	scer=NA(NA)	spar=YLR342W.763965(TTG)
suva=YOR166C.398960(TTG)	scer=NA(NA)	spar=YOR166C.595207(TTG)
suva=YGR218W.888378(ATC)	scer=NA(NA)	spar=YGR218W.897359(ATC)
suva=YDL235C.21606(ATT)	scer=NA(NA)	spar=YDL235C.39611(ATA)
suva=YDL055C.346437(ATA)	scer=NA(NA)	spar=YDL055C.361732(ATA)
suva=YGL202W.111986(ATA)	scer=NA(NA)	spar=YGL202W.118159(ACG)
suva=YKR026C.473793(ATT)	scer=NA(NA)	spar=YKR026C.504614(ATA)
suva=YER148W.435375(ATA)	scer=NA(NA)	spar=YER148W.470852(GTG)
suva=YKL182W.85150(TTG)	scer=NA(NA)	spar=YKL182W.108816(ATT)
suva=YOL123W.65388(CTG)	scer=NA(NA)	spar=YOL123W.77288(ATA)
suva=YLL053C.39488(ACG)	scer=NA(NA)	spar=YLL053C.23129(ATC)
suva=YBR212W.818136(GTG)	scer=NA(NA)	spar=YBR212W.626619(ATA)
suva=YHR142W.586864(ATC)	scer=NA(NA)	spar=YHR142W.362321(TTG)
suva=YLR403W.891080(ATA)	scer=NA(NA)	spar=YLR403W.880051(CTG)
suva=YNL094W.446060(ATC)	scer=NA(NA)	spar=YNL094W.432936(ATC)
suva=YLR449W.985621(ATA)	scer=NA(NA)	spar=YLR449W.975816(ATG)
suva=YKL185W.79181(ATT)	scer=NA(NA)	spar=YKL185W.102967(ATT)
suva=YKL185W.79165(ATT)	scer=NA(NA)	spar=YKL185W.102942(ATT)
suva=YPL145C.289041(TTG)	scer=NA(NA)	spar=YPL145C.304894(ACG)
suva=YNL068C.497241(ATT)	scer=NA(NA)	spar=YNL068C.483879(GTG)
suva=YOL130W.52301(TTG)	scer=NA(NA)	spar=YOL130W.63770(ATT)
suva=YLR208W.532302(ACG)	scer=NA(NA)	spar=YLR208W.524745(ATC)
suva=YNL183C.291685(ATT)	scer=NA(NA)	spar=YNL183C.279804(ATA)
suva=YDR062W.376639(ATT)	scer=NA(NA)	spar=YDR062W.575170(ATT)
suva=YDR074W.394014(ATT)	scer=NA(NA)	spar=YDR074W.592680(TTG)
suva=YDL140C.198950(ATT)	scer=NA(NA)	spar=YDL140C.215515(CNN)
suva=YOR136W.335351(GTG)	scer=NA(NA)	spar=YOR136W.532267(TTG)
suva=YNL154C.341901(GTG)	scer=NA(NA)	spar=YNL154C.329784(CTG)
suva=YBR140C.695912(TTG)	scer=NA(NA)	spar=YBR140C.499404(TTG)
suva=YBR242W.875621(ATG)	scer=NA(NA)	spar=YBR242W.684541(ATG)
suva=YBL092W.42107(ATG)	scer=NA(NA)	spar=YBL092W.40902(ATG)
suva=YLR167W.471063(ATT)	scer=NA(NA)	spar=YLR167W.464034(ATT)
suva=YDR071C.389798(TTG)	scer=NA(NA)	spar=YDR071C.588332(ATT)
suva=YOR315W.645435(ATG)	scer=NA(NA)	spar=YOR315W.846375(ATG)
suva=YJL138C.395375(GTG)	scer=NA(NA)	spar=YJL138C.146629(CTG)
suva=YGR054W.571904(ATA)	scer=NA(NA)	spar=YGR054W.577327(ATA)
suva=YNL197C.265436(ATT)	scer=NA(NA)	spar=YNL197C.253766(ATC)
suva=YGR156W.769980(TTG)	scer=NA(NA)	spar=YGR156W.776797(CTG)
suva=YNL283C.101132(TTG)	scer=NA(NA)	spar=YNL283C.90233(ATT)
suva=YGL055W.391711(GTG)	scer=NA(NA)	spar=YGL055W.396989(GTG)
suva=YDL006W.437180(CTG)	scer=NA(NA)	spar=YDL006W.447903(CTG)
suva=YFL030W.49775(ATC)	scer=NA(NA)	spar=YFL030W.109437(ATC)
suva=YDL224C.44659(ATC)	scer=NA(NA)	spar=YDL224C.62106(TTG)
suva=YLR388W.863820(ATG)	scer=NA(NA)	spar=YLR388W.852890(ATT)
suva=YPL034W.489622(ATG)	scer=NA(NA)	spar=YPL034W.505503(ATG)
suva=YPL034W.489862(ACG)	scer=NA(NA)	spar=YPL034W.505743(ATG)
suva=YER072W.278309(TTG)	scer=NA(NA)	spar=YER072W.303212(ATT)
suva=YPL082C.414297(CTG)	scer=NA(NA)	spar=YPL082C.429173(ACG)
suva=YOR153W.368845(ATT)	scer=NA(NA)	spar=YOR153W.566183(TTG)
suva=YDL134C.209715(ATG)	scer=NA(NA)	spar=YDL134C.226164(TTG)
suva=YJR045C.195366(ATT)	scer=NA(NA)	spar=YJR045C.497467(ATT)
suva=YNL229C.214340(GTG)	scer=NA(NA)	spar=YNL229C.203900(ATT)
suva=YJL124C.362224(TTG)	scer=NA(NA)	spar=YJL124C.180592(ATC)
suva=YNL219C.231938(TTG)	scer=NA(NA)	spar=YNL219C.221384(TTG)
suva=YGL173C.176178(ATT)	scer=NA(NA)	spar=YGL173C.180216(ACG)
suva=YPR156C.836302(ATC)	scer=NA(NA)	spar=YPR156C.852004(TTG)
suva=YNL299W.63202(TTG)	scer=NA(NA)	spar=YNL299W.53905(ATA)
suva=YMR054W.364526(TTG)	scer=NA(NA)	spar=YMR054W.361305(GTG)
suva=YGL008C.474101(ATT)	scer=NA(NA)	spar=YGL008C.479386(ATT)
suva=YGL008C.474133(TTG)	scer=NA(NA)	spar=YGL008C.479418(TTG)
suva=YJL039C.54875(TTG)	scer=NA(NA)	spar=YJL039C.345679(TTG)
suva=YHR162W.626939(TTG)	scer=NA(NA)	spar=YHR162W.401504(TTG)
suva=YMR166C.574588(ACG)	scer=NA(NA)	spar=YMR166C.575913(ACG)
suva=YNR016C.643265(ATG)	scer=NA(NA)	spar=YNR016C.638199(ATG)
suva=YBR249C.889163(ATA)	scer=NA(NA)	spar=YBR249C.697996(ATA)
suva=YNL287W.89127(GTG)	scer=NA(NA)	spar=YNL287W.79324(GTG)
suva=YDR280W.785649(TTG)	scer=NA(NA)	spar=YDR280W.1065211(TTG)
suva=YGL190C.143063(ATT)	scer=NA(NA)	spar=YGL190C.147656(TTG)
suva=YGL190C.142922(TTG)	scer=NA(NA)	spar=YGL190C.147521(ATC)
suva=YGR027C.526194(ATG)	scer=NA(NA)	spar=YGR027C.531776(ATG)
suva=YGR027C.526235(ATG)	scer=NA(NA)	spar=YGR027C.531815(ATG)
suva=YOR065W.210175(TTG)	scer=NA(NA)	spar=YOR065W.434541(TTG)
suva=YNL156C.338620(TTG)	scer=NA(NA)	spar=YNL156C.326509(TTG)
suva=YNL156C.338441(ATT)	scer=NA(NA)	spar=YNL156C.326351(ATT)
suva=YGR244C.934521(TTG)	scer=NA(NA)	spar=YGR244C.944646(CTG)
suva=YLR256W.613347(TTG)	scer=NA(NA)	spar=YLR256W.605800(TTG)
suva=YHR152W.605443(ATC)	scer=NA(NA)	spar=YHR152W.379893(TTG)
suva=YBR221C.836575(ATT)	scer=NA(NA)	spar=YBR221C.646294(ATT)
suva=YBR221C.836686(ATA)	scer=NA(NA)	spar=YBR221C.646400(TTG)
suva=YER159C.464313(ATT)	scer=NA(NA)	spar=YER159C.498674(ATT)
suva=YEL009C.115506(ATT)	scer=NA(NA)	spar=YEL009C.130246(ATT)
suva=YGR240C.928264(ATT)	scer=NA(NA)	spar=YGR240C.939079(TTG)
suva=YNR055C.715005(ATC)	scer=NA(NA)	spar=YNR055C.707022(TTG)
suva=YPR119W.778814(ATT)	scer=NA(NA)	spar=YPR119W.788709(ATC)
suva=YNL085W.465713(TTG)	scer=NA(NA)	spar=YNL085W.452494(TTG)
suva=YAL029C.68812(ATA)	scer=NA(NA)	spar=YAL029C.67593(TTG)
suva=YGR089W.633542(ATA)	scer=NA(NA)	spar=YGR089W.637739(CTG)
suva=YDR225W.695227(ATT)	scer=NA(NA)	spar=YDR225W.890761(ATT)
suva=YAL023C.84954(CTG)	scer=NA(NA)	spar=YAL023C.83813(CTG)
suva=NA(NA)	scer=YPL076W.410390(ATG)	spar=YPL076W.435483(ATG)
suva=NA(NA)	scer=YMR171C.605683(ATG)	spar=YMR171C.587086(ATG)
suva=NA(NA)	scer=YOR232W.774542(ATT)	spar=YOR232W.714940(GTG)
suva=NA(NA)	scer=YHR007C.121717(TTG)	spar=YHR007C.100402(ATT)
suva=NA(NA)	scer=YKL190W.82906(ATG)	spar=YKL190W.91036(ATG)
suva=NA(NA)	scer=YBR121C.483437(ATT)	spar=YBR121C.456032(ATT)
suva=NA(NA)	scer=YKR091W.611440(ATG)	spar=YKR091W.626722(TTG)
suva=NA(NA)	scer=YKL063C.321540(GTG)	spar=YKL063C.335115(GTG)
suva=NA(NA)	scer=YMR195W.653982(ATG)	spar=YMR195W.637426(ATG)
suva=NA(NA)	scer=YLR009W.166477(GTG)	spar=YLR009W.154502(ACG)
suva=NA(NA)	scer=YLR347C.826451(CTG)	spar=YLR347C.780969(CTG)
suva=NA(NA)	scer=YHR009C.125930(ATG)	spar=YHR009C.104581(ATG)
suva=NA(NA)	scer=YGL006W.485876(GTG)	spar=YGL006W.482491(GTG)
suva=NA(NA)	scer=YGL134W.255638(ATG)	spar=YGL134W.254879(ATG)
suva=NA(NA)	scer=YBR043C.324011(ATA)	spar=YBR043C.295768(ATA)
suva=NA(NA)	scer=YNL164C.326339(ATG)	spar=YNL164C.310635(ATG)
suva=NA(NA)	scer=YDR086C.617228(TTG)	spar=YDR086C.616066(TTG)
suva=NA(NA)	scer=YNL186W.289474(TTG)	spar=YNL186W.273756(TTG)
suva=NA(NA)	scer=YPL239W.99413(TTG)	spar=YPL239W.124157(TTG)
suva=NA(NA)	scer=YJL159W.120409(ATA)	spar=YJL159W.112443(ATA)
suva=NA(NA)	scer=YDR077W.600773(ATA)	spar=YDR077W.599585(ATA)
suva=NA(NA)	scer=YER094C.349389(TTG)	spar=YER094C.360287(TTG)
suva=NA(NA)	scer=YPL148C.272859(ATG)	spar=YPL148C.297933(TTG)
suva=NA(NA)	scer=YFL009W.116081(TTG)	spar=YFL009W.150194(TTG)
suva=NA(NA)	scer=YMR010W.284871(ATG)	spar=YMR010W.273638(ATG)
suva=NA(NA)	scer=YKL064W.317662(ATG)	spar=YKL064W.331273(ATG)
suva=NA(NA)	scer=YLR229C.604808(ACG)	spar=YLR229C.563482(ACG)
suva=NA(NA)	scer=YHR011W.127570(ATG)	spar=YHR011W.106213(ATG)
suva=NA(NA)	scer=YPL125W.313348(CTG)	spar=YPL125W.338491(CTG)
suva=NA(NA)	scer=YNL190W.282294(ATT)	spar=YNL190W.266554(ATT)
suva=NA(NA)	scer=YNL190W.282332(TTG)	spar=YNL190W.266590(TTG)
suva=NA(NA)	scer=YGL206C.107562(TTG)	spar=YGL206C.107949(TTG)
suva=NA(NA)	scer=YOL112W.106577(ATG)	spar=YOL112W.96077(ATG)
suva=NA(NA)	scer=YLR342W.809945(ATT)	spar=YLR342W.764014(ATT)
suva=NA(NA)	scer=YLR342W.809968(ATC)	spar=YLR342W.764037(ATA)
suva=NA(NA)	scer=YMR258C.784308(ATG)	spar=YMR258C.732603(ATG)
suva=NA(NA)	scer=YGL044C.417062(TTG)	spar=YGL044C.413778(ATC)
suva=NA(NA)	scer=YDL132W.224201(TTG)	spar=YDL132W.229086(TTG)
suva=NA(NA)	scer=YPR016C.593110(TTG)	spar=YPR016C.607518(ATA)
suva=NA(NA)	scer=YPR016C.593153(TTG)	spar=YPR016C.607574(TTG)
suva=NA(NA)	scer=YHL011C.81639(ATA)	spar=YHL011C.72590(CTG)
suva=NA(NA)	scer=YKL182W.100529(ATG)	spar=YKL182W.108953(ATG)
suva=NA(NA)	scer=YGR093W.670337(ATG)	spar=YGR093W.651775(ATG)
suva=NA(NA)	scer=YCR045W-A.208217(TTG)	spar=YCR045W-A.191813(TTG)
suva=NA(NA)	scer=YPL221W.132856(TTG)	spar=YPL221W.157678(TTG)
suva=NA(NA)	scer=YBR270C.744595(ATG)	spar=YBR270C.724510(ATG)
suva=NA(NA)	scer=YPR149W.829891(ATA)	spar=YPR149W.842092(ATA)
suva=NA(NA)	scer=YCR084C.262572(ATT)	spar=YCR084C.246859(ATT)
suva=NA(NA)	scer=YER089C.337382(ATT)	spar=YER089C.347993(TTG)
suva=NA(NA)	scer=YER089C.337583(TTG)	spar=YER089C.348187(TTG)
suva=NA(NA)	scer=YBR158W.556332(ATG)	spar=YBR158W.528913(ATG)
suva=NA(NA)	scer=YDL020C.416748(TTG)	spar=YDL020C.425312(TTG)
suva=NA(NA)	scer=YDL160C.172029(ATT)	spar=YDL160C.176367(ATC)
suva=NA(NA)	scer=YML016C.241728(ATG)	spar=YML016C.229707(ATG)
suva=NA(NA)	scer=YPL057C.453201(ATG)	spar=YPL057C.472965(ATG)
suva=NA(NA)	scer=YPL227C.121257(ATG)	spar=YPL227C.146046(ATG)
suva=NA(NA)	scer=YPR024W.610375(TTG)	spar=YPR024W.624852(TTG)
suva=NA(NA)	scer=YLR120C.388259(GTG)	spar=YLR120C.371287(TTG)
suva=NA(NA)	scer=YDL198C.104619(ATG)	spar=YDL198C.110283(ATG)
suva=NA(NA)	scer=YOL130W.74297(ATG)	spar=YOL130W.63700(ATG)
suva=NA(NA)	scer=YOL130W.74118(ATG)	spar=YOL130W.63531(ATG)
suva=NA(NA)	scer=YPL265W.41007(GTG)	spar=YPL265W.62865(CTG)
suva=NA(NA)	scer=YMR145C.556513(TTG)	spar=YMR145C.535749(TTG)
suva=NA(NA)	scer=YDR074W.593866(CTG)	spar=YDR074W.592680(TTG)
suva=NA(NA)	scer=YDR074W.593836(TTG)	spar=YDR074W.592646(TTG)
suva=NA(NA)	scer=YNR044W.703593(ATG)	spar=YNR044W.680017(ATG)
suva=NA(NA)	scer=YCR027C.168099(TTG)	spar=YCR027C.151719(TTG)
suva=NA(NA)	scer=YDR206W.862021(TTG)	spar=YDR206W.849101(TTG)
suva=NA(NA)	scer=YBR242W.704493(ATG)	spar=YBR242W.684473(ATG)
suva=NA(NA)	scer=YBL045C.135552(CTG)	spar=YBL045C.130751(TTG)
suva=NA(NA)	scer=YLR360W.846073(ATT)	spar=YLR360W.800641(ATT)
suva=NA(NA)	scer=YLR407W.932912(TTG)	spar=YLR407W.889072(ATA)
suva=NA(NA)	scer=YKL181W.107246(ACG)	spar=YKL181W.115667(ATT)
suva=NA(NA)	scer=YKL181W.107269(CTG)	spar=YKL181W.115687(CTG)
suva=NA(NA)	scer=YJL098W.241979(ATG)	spar=YJL098W.230863(ATG)
suva=NA(NA)	scer=YGL028C.443363(ATG)	spar=YGL028C.440006(TTG)
suva=NA(NA)	scer=YHR183W.470909(TTG)	spar=YHR183W.450805(TTG)
suva=NA(NA)	scer=YBR008C.254856(ATG)	spar=YBR008C.232180(ATG)
suva=NA(NA)	scer=YDR232W.927361(TTG)	spar=YDR232W.902480(TTG)
suva=NA(NA)	scer=YGL169W.186021(ATG)	spar=YGL169W.186075(ATG)
suva=NA(NA)	scer=YBR187W.602519(ATG)	spar=YBR187W.579728(ATG)
suva=NA(NA)	scer=YNL201C.263266(TTG)	spar=YNL201C.247389(TTG)
suva=NA(NA)	scer=YDR153C.768006(ACG)	spar=YDR153C.758294(ATA)
suva=NA(NA)	scer=YDR043C.543541(ATG)	spar=YDR043C.542134(ATG)
suva=NA(NA)	scer=YPR013C.585704(ATG)	spar=YPR013C.599986(ATG)
suva=NA(NA)	scer=YGL167C.190550(ATA)	spar=YGL167C.190612(ATA)
suva=NA(NA)	scer=YLR019W.180218(TTG)	spar=YLR019W.168400(TTG)
suva=NA(NA)	scer=YPL260W.49268(TTG)	spar=YPL260W.71061(TTG)
suva=NA(NA)	scer=YER057C.271161(ATT)	spar=YER057C.272156(ATA)
suva=NA(NA)	scer=YKL163W.143644(ATG)	spar=YKL163W.153263(ATG)
suva=NA(NA)	scer=YMR089C.448236(TTG)	spar=YMR089C.427365(ATT)
suva=NA(NA)	scer=YDR276C.1013673(TTG)	spar=YDR276C.1059057(TTG)
suva=NA(NA)	scer=YDL084W.305187(TTG)	spar=YDL084W.310033(TTG)
suva=NA(NA)	scer=YDL028C.403370(TTG)	spar=YDL028C.412058(TTG)
suva=NA(NA)	scer=YOR153W.619756(TTG)	spar=YOR153W.566183(TTG)
suva=NA(NA)	scer=YLR372W.867330(TTG)	spar=YLR372W.821979(TTG)
suva=NA(NA)	scer=YIL125W.122519(TTG)	spar=YIL125W.103276(TTG)
suva=NA(NA)	scer=YKL054C.338808(ATT)	spar=YKL054C.352401(ATT)
suva=NA(NA)	scer=YDL171C.155819(TTG)	spar=YDL171C.160202(CTG)
suva=NA(NA)	scer=YCR011C.136911(TTG)	spar=YCR011C.119882(TTG)
suva=NA(NA)	scer=YNL125C.392303(ATG)	spar=YNL125C.376760(ATG)
suva=NA(NA)	scer=YAR015W.169336(TTG)	spar=YAR015W.138760(ATA)
suva=NA(NA)	scer=YPR156C.839904(TTG)	spar=YPR156C.851953(TTG)
suva=NA(NA)	scer=YDR266C.1002080(TTG)	spar=YDR266C.1047451(CTG)
suva=NA(NA)	scer=YDR395W.1263282(TTG)	spar=YDR395W.1228923(TTG)
suva=NA(NA)	scer=YIL122W.130562(ATT)	spar=YIL122W.111279(TTG)
suva=NA(NA)	scer=YDR065W.580669(ATG)	spar=YDR065W.579549(ATG)
suva=NA(NA)	scer=YKL032C.381896(GTG)	spar=YKL032C.395292(GTG)
suva=NA(NA)	scer=YJL026W.392380(ACG)	spar=YJL026W.382958(ATT)
suva=NA(NA)	scer=YPR072W.690083(ATG)	spar=YPR072W.706509(ATG)
suva=NA(NA)	scer=YMR108W.484042(TTG)	spar=YMR108W.463671(TTG)
suva=NA(NA)	scer=YOR061W.441431(ATG)	spar=YOR061W.428638(ATG)
suva=NA(NA)	scer=YLR113W.371547(ATT)	spar=YLR113W.353782(ATT)
suva=NA(NA)	scer=YHR162W.423015(TTG)	spar=YHR162W.401504(TTG)
suva=NA(NA)	scer=YML038C.204197(ATT)	spar=YML038C.192273(ATT)
suva=NA(NA)	scer=YOR233W.775730(GTG)	spar=YOR233W.716115(ATT)
suva=NA(NA)	scer=YNR016C.661888(TTG)	spar=YNR016C.638371(TTG)
suva=NA(NA)	scer=YPL235W.103203(TTG)	spar=YPL235W.127955(TTG)
suva=NA(NA)	scer=YDR280W.1020714(TTG)	spar=YDR280W.1065211(TTG)
suva=NA(NA)	scer=YLL051C.39525(ATG)	spar=YLL051C.26547(ATG)
suva=NA(NA)	scer=YDR033W.508104(ATC)	spar=YDR033W.516816(ATT)
suva=NA(NA)	scer=YDR033W.508062(TTG)	spar=YDR033W.516773(TTG)
suva=NA(NA)	scer=YML056C.164275(ATG)	spar=YML056C.164150(ATG)
suva=NA(NA)	scer=YOR272W.832743(ATG)	spar=YOR272W.773230(ATG)
suva=NA(NA)	scer=YPR103W.732298(TTG)	spar=YPR103W.748964(TTG)
suva=NA(NA)	scer=YGR209C.913264(ACG)	spar=YGR209C.878673(ATA)
suva=NA(NA)	scer=YML068W.137529(ATG)	spar=YML068W.137343(ATG)
suva=NA(NA)	scer=YGR057C.605526(ATG)	spar=YGR057C.586225(ATG)
suva=NA(NA)	scer=YML106W.56727(ATG)	spar=YML106W.56359(ATG)
suva=NA(NA)	scer=YML106W.56697(TTG)	spar=YML106W.56329(TTG)
suva=NA(NA)	scer=YKL109W.232165(ATG)	spar=YKL109W.242638(ATG)
suva=NA(NA)	scer=YFR033C.224816(ATA)	spar=YFR033C.251787(ATA)
suva=NA(NA)	scer=YLR150W.440422(GTG)	spar=YLR150W.423770(GTG)
suva=NA(NA)	scer=YPL140C.289170(ATG)	spar=YPL140C.314270(ATG)
suva=NA(NA)	scer=YLR256W.646293(TTG)	spar=YLR256W.605800(TTG)
suva=NA(NA)	scer=YEL009C.140194(ATA)	spar=YEL009C.130290(ATA)
suva=NA(NA)	scer=YEL009C.140056(ATG)	spar=YEL009C.130152(ATG)
suva=NA(NA)	scer=YDR034C.512137(TTG)	spar=YDR034C.520816(TTG)
suva=NA(NA)	scer=YGR240C.973781(TTG)	spar=YGR240C.939079(TTG)
suva=NA(NA)	scer=YNL076W.483398(ATG)	spar=YNL076W.468902(ATG)
suva=NA(NA)	scer=YOL125W.83787(ATG)	spar=YOL125W.73267(ATG)
suva=NA(NA)	scer=YPR036W-A.645906(CTG)	spar=YPR036W-A.660946(CTG)
suva=NA(NA)	scer=YDR237W.936585(TTG)	spar=YDR237W.911724(TTG)
suva=NA(NA)	scer=YHR135C.374390(ATG)	spar=YHR135C.353250(ATG)
suva=NA(NA)	scer=YDL177C.141749(ATG)	spar=YDL177C.146210(ATG)
suva=NA(NA)	scer=YDR346C.1168712(TTG)	spar=YDR346C.1013029(ATT)
suva=NA(NA)	scer=YPR165W.875304(CTG)	spar=YPR165W.875243(TTG)
suva=NA(NA)	scer=YNL098C.440596(TTG)	spar=YNL098C.425176(TTG)

## Sheet: Position conserved homologs
S. uvarum	S. cerevisiae	S. paradoxus
suva=YMR205C.655195(TTG)	scer=YMR205C.674790(TTG)	spar=YMR205C.658181(TTG)
suva=YNL094W.446007(ATG)	scer=YNL094W.447456(ATG)	spar=YNL094W.432886(ATG)
suva=YBL099W.33109(TTG)	scer=YBL099W.36818(TTG)	spar=YBL099W.32119(TTG)
suva=YGR175C.806139(ATT)	scer=YGR175C.848466(TTG)	spar=YGR175C.815077(CTG)
suva=YML106W.56521(ATT)	scer=YML106W.56727(ATG)	spar=YML106W.56359(ATG)
suva=YOR136W.335308(ATG)	scer=YOR136W.580152(ATG)	spar=YOR136W.532228(ATG)
suva=YFL009W.88397(ATT)	scer=YFL009W.116081(TTG)	spar=YFL009W.150194(TTG)
suva=YDR352W.938586(ATA)	scer=YDR352W.1181754(TTG)	spar=YDR352W.1000582(ATC)
suva=YNL125C.388843(ATG)	scer=YNL125C.392303(ATG)	spar=YNL125C.376760(ATG)
suva=YJL159W.429780(ATT)	scer=YJL159W.120409(ATA)	spar=YJL159W.112443(ATA)
suva=YGL135W.250754(TTG)	scer=YGL135W.254614(TTG)	spar=YGL135W.253853(TTG)
suva=YDR346C.925730(ATT)	scer=YDR346C.1168712(TTG)	spar=YDR346C.1013029(ATT)
suva=YMR258C.763620(ATA)	scer=YMR258C.784308(ATG)	spar=YMR258C.732603(ATG)
suva=YEL026W.75674(TTG)	scer=YEL026W.101901(TTG)	spar=YEL026W.80276(TTG)
suva=YMR145C.536013(ATG)	scer=YMR145C.556639(ATG)	spar=YMR145C.535876(ATG)
suva=YIL122W.125320(ATC)	scer=YIL122W.130562(ATT)	spar=YIL122W.111279(TTG)
suva=YDR381W.987313(ATA)	scer=YDR381W.1236540(ATA)	spar=YDR381W.951099(ATA)
suva=YPL034W.489622(ATG)	scer=YPL034W.486410(ATG)	spar=YPL034W.505503(ATG)
suva=YPR156C.836226(ATT)	scer=YPR156C.839904(TTG)	spar=YPR156C.851953(TTG)
suva=YKL109W.218389(ATT)	scer=YKL109W.232165(ATG)	spar=YKL109W.242638(ATG)
suva=YGL202W.111986(ATA)	scer=YGL202W.116018(TTG)	spar=YGL202W.118159(ACG)
suva=YDL028C.393806(ATG)	scer=YDL028C.403308(ATG)	spar=YDL028C.412002(ATG)
suva=YJR007W.134016(GTG)	scer=YJR007W.450972(TTG)	spar=YJR007W.441762(GTG)
suva=YER107C.347674(CTG)	scer=YER107C.374593(ATT)	spar=YER107C.385693(ATT)
suva=YHR030C.377683(TTG)	scer=YHR030C.170400(TTG)	spar=YHR030C.148748(TTG)
suva=YPL179W.217854(ATT)	scer=YPL179W.208128(TTG)	spar=YPL179W.233584(ATT)
suva=YJL133W.389477(ATG)	scer=YJL133W.160595(ATG)	spar=YJL133W.152435(ATG)
suva=YLR188W.500919(ATT)	scer=YLR188W.528246(ATG)	spar=YLR188W.493500(ATG)
suva=YJL139C.397049(ATG)	scer=YJL139C.153053(ATG)	spar=YJL139C.144951(ATG)
suva=YNR016C.643265(ATG)	scer=YNR016C.661737(ATC)	spar=YNR016C.638228(ATT)
suva=YHR051W.413294(ATT)	scer=YHR051W.209669(TTG)	spar=YHR051W.187485(TTG)
suva=YPL164C.250673(ATG)	scer=YPL164C.241528(ATG)	spar=YPL164C.266585(ATG)
suva=YMR234W.721559(ATG)	scer=YMR234W.740184(ATG)	spar=YMR234W.687834(ATG)
suva=YDR293C.814180(TTG)	scer=YDR293C.1049421(TTG)	spar=YDR293C.1093685(ATT)
suva=YEL009C.115472(ATT)	scer=YEL009C.140124(ATG)	spar=YEL009C.130219(ATG)
suva=YEL034W.61066(ATA)	scer=YEL034W.85656(ATA)	spar=YEL034W.63516(ATA)
suva=YEL036C.59986(ATG)	scer=YEL036C.84572(ATG)	spar=YEL036C.62428(ATG)
suva=YEL013W.100357(TTG)	scer=YEL013W.128688(TTG)	spar=YEL013W.107298(CTG)
suva=YFR049W.11067(ATT)	scer=YFR049W.248431(ATT)	spar=YFR049W.275303(ATT)
suva=YDR046C.349761(ATG)	scer=YDR046C.550629(ATG)	spar=YDR046C.549120(ATG)
suva=YDR045C.347514(ATG)	scer=YDR045C.548370(ATG)	spar=YDR045C.546868(ATG)
suva=YDL081C.299555(TTG)	scer=YDL081C.310172(TTG)	spar=YDL081C.315029(TTG)
suva=YKL064W.300408(ATA)	scer=YKL064W.317662(ATG)	spar=YKL064W.331273(ATG)
suva=YDL134C.210096(ATC)	scer=YDL134C.221683(ATT)	spar=YDL134C.226560(ATT)
suva=YER123W.379119(TTG)	scer=YER123W.404718(ATT)	spar=YER123W.415745(TTG)
suva=YMR305C.862992(CTG)	scer=YMR305C.880276(TTG)	spar=YMR305C.828470(ATT)
suva=YLL027W.91517(ATG)	scer=YLL027W.87215(ATG)	spar=YLL027W.74445(ATG)
suva=YNL190W.278304(TTG)	scer=YNL190W.282221(TTG)	spar=YNL190W.266478(TTG)
suva=YML106W.56489(CTG)	scer=YML106W.56697(TTG)	spar=YML106W.56329(TTG)
suva=YER094C.322864(CTG)	scer=YER094C.349376(ATT)	spar=YER094C.360287(TTG)
suva=YPL145C.289100(CTG)	scer=YPL145C.279869(TTG)	spar=YPL145C.304956(TTG)
suva=YOR232W.513593(TTG)	scer=YOR232W.774542(ATT)	spar=YOR232W.714940(GTG)
suva=YDL047W.357592(CTG)	scer=YDL047W.369719(GTG)	spar=YDL047W.374908(GTG)
suva=YKL182W.85150(TTG)	scer=YKL182W.100394(TTG)	spar=YKL182W.108816(ATT)
suva=YER081W.295547(ATG)	scer=YER081W.322234(ATG)	spar=YER081W.332814(ATA)
suva=YNR055C.715138(ATG)	scer=YNR055C.730401(ATG)	spar=YNR055C.707163(ATG)
suva=YPR103W.739811(GTG)	scer=YPR103W.732298(TTG)	spar=YPR103W.748964(TTG)
suva=YDR326C.882419(ACG)	scer=YDR326C.1124984(TTG)	spar=YDR326C.1163125(TTG)
suva=YMR010W.275691(ATA)	scer=YMR010W.284871(ATG)	spar=YMR010W.273638(ATG)
suva=YDL141W.190889(ATA)	scer=YDL141W.203018(ATT)	spar=YDL141W.207336(ATT)
suva=YER094C.322864(CTG)	scer=YER094C.349389(TTG)	spar=YER094C.360287(TTG)
suva=YBR168W.741749(ATG)	scer=YBR168W.572266(ATG)	spar=NA(NA)
suva=YHL027W.53040(ATA)	scer=YHL027W.51071(CTG)	spar=NA(NA)
suva=YKR042W.502628(GTG)	scer=YKR042W.519399(GTG)	spar=NA(NA)
suva=YLR414C.913973(ATT)	scer=YLR414C.954208(TTG)	spar=NA(NA)
suva=YER159C.464426(ATG)	scer=YER159C.492120(ATG)	spar=NA(NA)
suva=YIL109C.155000(TTG)	scer=YIL109C.160207(TTG)	spar=NA(NA)
suva=YNL076W.482257(ATA)	scer=YNL076W.483521(ATT)	spar=NA(NA)
suva=YNR016C.643144(ATT)	scer=YNR016C.661615(TTG)	spar=NA(NA)
suva=YDL133W.210812(ATA)	scer=YDL133W.222371(ATG)	spar=NA(NA)
suva=YDL138W.201591(ATG)	scer=YDL138W.213324(ATG)	spar=NA(NA)
suva=YDR266C.768700(ATT)	scer=YDR266C.1002080(TTG)	spar=NA(NA)
suva=YDR346C.925730(ATT)	scer=YDR346C.1168712(TTG)	spar=NA(NA)
suva=YNL098C.438044(ATC)	scer=YNL098C.440596(TTG)	spar=NA(NA)
suva=YIL038C.271316(ATG)	scer=YIL038C.282669(ATG)	spar=NA(NA)
suva=YDR382W.990399(CTG)	scer=YDR382W.1239443(CTG)	spar=NA(NA)
suva=YGR267C.980588(TTG)	scer=YGR267C.1025793(GTG)	spar=NA(NA)
suva=YLR242C.590745(GTG)	scer=YLR242C.623923(ATG)	spar=NA(NA)
suva=YML016C.231974(TTG)	scer=YML016C.241591(TTG)	spar=NA(NA)
suva=YLR048W.243834(ATA)	scer=YLR048W.242207(ATA)	spar=NA(NA)
suva=YMR108W.465159(ACG)	scer=YMR108W.484031(ATC)	spar=NA(NA)
suva=YNL186W.285486(ATG)	scer=YNL186W.289370(ATG)	spar=NA(NA)
suva=YLR407W.898608(TTG)	scer=YLR407W.932912(TTG)	spar=NA(NA)
suva=YER107C.347674(CTG)	scer=YER107C.374593(ATT)	spar=NA(NA)
suva=YOL123W.65259(ATT)	scer=YOL123W.87681(TTG)	spar=NA(NA)
suva=YOL123W.65388(CTG)	scer=YOL123W.87812(CTG)	spar=NA(NA)
suva=YPR021C.608018(CTG)	scer=YPR021C.603398(ATG)	spar=NA(NA)
suva=YBR078W.560064(ACG)	scer=YBR078W.393071(ACG)	spar=NA(NA)
suva=YER090W.311379(CTG)	scer=YER090W.337918(CTG)	spar=NA(NA)
suva=YOR061W.204358(CTG)	scer=YOR061W.441475(TTG)	spar=NA(NA)
suva=YPR165W.859738(TTG)	scer=YPR165W.875304(CTG)	spar=NA(NA)
suva=YOR043W.173500(TTG)	scer=YOR043W.410739(TTG)	spar=NA(NA)
suva=YER091C.315711(TTG)	scer=YER091C.342222(TTG)	spar=NA(NA)
suva=YOR118W.304585(CTG)	scer=YOR118W.546804(CTG)	spar=NA(NA)
suva=YGL123W.273755(GTG)	scer=YGL123W.277565(GTG)	spar=NA(NA)
suva=YBR154C.718309(ATA)	scer=YBR154C.549047(ATT)	spar=NA(NA)
suva=YIL048W.250234(GTG)	scer=YIL048W.261410(GTG)	spar=NA(NA)
suva=YOL100W.102195(ATG)	scer=YOL100W.129156(ATG)	spar=NA(NA)
suva=YNL037C.546392(ATT)	scer=YNL037C.559076(CTG)	spar=NA(NA)
suva=YJL101C.315562(TTG)	scer=YJL101C.236396(GTG)	spar=NA(NA)
suva=YOR267C.563961(TTG)	scer=YOR267C.824916(ATA)	spar=NA(NA)
suva=YNL156C.338620(TTG)	scer=YNL156C.342176(ATG)	spar=NA(NA)
suva=YNL063W.506677(ATA)	scer=YNL063W.507720(ATG)	spar=NA(NA)
suva=YMR241W.733511(CTG)	scer=YMR241W.751918(TTG)	spar=NA(NA)
suva=YDR389W.1003365(GTG)	scer=YDR389W.1252305(TTG)	spar=NA(NA)
suva=YLR340W.766904(CTG)	scer=YLR340W.805848(CTG)	spar=NA(NA)
suva=YEL020C-B.111172(GTG)	scer=YEL020C-B.117686(ATT)	spar=NA(NA)
suva=YDL176W.129225(ATG)	scer=YDL176W.141993(ATG)	spar=NA(NA)
suva=YER129W.391557(ATG)	scer=YER129W.417164(ATG)	spar=NA(NA)
suva=YEL013W.100261(CTG)	scer=YEL013W.128787(GTG)	spar=NA(NA)
suva=YPR085C.717204(ATG)	scer=YPR085C.709872(ATG)	spar=NA(NA)
suva=YER094C.322864(CTG)	scer=YER094C.349376(ATT)	spar=NA(NA)
suva=YER159C.464313(ATT)	scer=YER159C.492014(ATA)	spar=NA(NA)
suva=YPL154C.270133(ATT)	scer=YPL154C.260981(GTG)	spar=NA(NA)
suva=YML023C.218968(GTG)	scer=YML023C.228690(ATG)	spar=NA(NA)
suva=YOL109W.88230(ATT)	scer=YOL109W.110277(ACG)	spar=NA(NA)
suva=YJL124C.362183(TTG)	scer=YJL124C.187705(TTG)	spar=NA(NA)
suva=YKL053C-A.322315(TTG)	scer=YKL053C-A.339484(GTG)	spar=NA(NA)
suva=YNL053W.522486(ATG)	scer=YNL053W.529838(ATG)	spar=NA(NA)
suva=YHR162W.626939(TTG)	scer=YHR162W.423015(TTG)	spar=NA(NA)
suva=YOR043W.173612(TTG)	scer=YOR043W.410841(TTG)	spar=NA(NA)
suva=YOR118W.304447(ATG)	scer=YOR118W.546671(ATG)	spar=NA(NA)
suva=YNL085W.465778(ATT)	scer=YNL085W.467082(TTG)	spar=NA(NA)
suva=YNL161W.328827(TTG)	scer=YNL161W.332563(CTG)	spar=NA(NA)
suva=YOR232W.513593(TTG)	scer=YOR232W.774542(ATT)	spar=NA(NA)
suva=YDL047W.357592(CTG)	scer=YDL047W.369719(GTG)	spar=NA(NA)
suva=YKL182W.85150(TTG)	scer=YKL182W.100394(TTG)	spar=NA(NA)
suva=YER081W.295547(ATG)	scer=YER081W.322234(ATG)	spar=NA(NA)
suva=YNR055C.715138(ATG)	scer=YNR055C.730401(ATG)	spar=NA(NA)
suva=YPR103W.739811(GTG)	scer=YPR103W.732298(TTG)	spar=NA(NA)
suva=YNL156C.338441(ATT)	scer=NA(NA)	spar=YNL156C.326351(ATT)
suva=YGL190C.142922(TTG)	scer=NA(NA)	spar=YGL190C.147521(ATC)
suva=YGR240C.928351(TTG)	scer=NA(NA)	spar=YGR240C.939180(ATA)
suva=YNL287W.89127(GTG)	scer=NA(NA)	spar=YNL287W.79324(GTG)
suva=YGL008C.474133(TTG)	scer=NA(NA)	spar=YGL008C.479418(TTG)
suva=YDR225W.695227(ATT)	scer=NA(NA)	spar=YDR225W.890761(ATT)
suva=YGR191W.836772(CTG)	scer=NA(NA)	spar=YGR191W.846173(CTG)
suva=YPR024W.616021(GTG)	scer=NA(NA)	spar=YPR024W.624927(GTG)
suva=YNL283C.101132(TTG)	scer=NA(NA)	spar=YNL283C.90233(ATT)
suva=YNR055C.715246(TTG)	scer=NA(NA)	spar=YNR055C.707269(GTG)
suva=YBR121C.652255(ATC)	scer=NA(NA)	spar=YBR121C.455981(ATC)
suva=YER125W.384463(ATA)	scer=NA(NA)	spar=YER125W.421072(GTG)
suva=YNL094W.446060(ATC)	scer=NA(NA)	spar=YNL094W.432936(ATC)
suva=YJL138C.395375(GTG)	scer=NA(NA)	spar=YJL138C.146629(CTG)
suva=YDR251W.740071(TTG)	scer=NA(NA)	spar=YDR251W.935810(GTG)
suva=YDR303C.836234(CTG)	scer=NA(NA)	spar=YDR303C.1115671(ATT)
suva=YOR375C.780774(ATA)	scer=NA(NA)	spar=YOR375C.980432(ATC)
suva=YPR119W.778604(ACG)	scer=NA(NA)	spar=YPR119W.788495(CTG)
suva=YGR244C.934521(TTG)	scer=NA(NA)	spar=YGR244C.944646(CTG)
suva=YOR335C.690992(ATA)	scer=NA(NA)	spar=YOR335C.890995(ATC)
suva=YNR051C.700080(ATT)	scer=NA(NA)	spar=YNR051C.694849(ATT)
suva=YGR026W.524308(ATC)	scer=NA(NA)	spar=YGR026W.529969(TTG)
suva=YBR121C.652279(ATT)	scer=NA(NA)	spar=YBR121C.456005(ATT)
suva=YDL117W.236993(ATC)	scer=NA(NA)	spar=YDL117W.253435(ATT)
suva=YDR346C.925730(ATT)	scer=NA(NA)	spar=YDR346C.1013029(ATT)
suva=YOR209C.476594(ATT)	scer=NA(NA)	spar=YOR209C.678161(TTG)
suva=YDR071C.389798(TTG)	scer=NA(NA)	spar=YDR071C.588332(ATT)
suva=YDL140C.199346(CTG)	scer=NA(NA)	spar=YDL140C.215916(TTG)
suva=YLR332W.751767(ATT)	scer=NA(NA)	spar=YLR332W.744566(TTG)
suva=YPR108W.750264(ATA)	scer=NA(NA)	spar=YPR108W.759044(ATT)
suva=YLR220W.549057(ATT)	scer=NA(NA)	spar=YLR220W.542077(CTG)
suva=YGR156W.769980(TTG)	scer=NA(NA)	spar=YGR156W.776797(CTG)
suva=YKL112W.212638(TTG)	scer=NA(NA)	spar=YKL112W.236969(CTG)
suva=YDL134C.210059(ATG)	scer=NA(NA)	spar=YDL134C.226529(ATC)
suva=YGL190C.143063(ATT)	scer=NA(NA)	spar=YGL190C.147656(TTG)
suva=YHR071W.438564(ATC)	scer=NA(NA)	spar=YHR071W.212699(ATG)
suva=YLR089C.325054(GTG)	scer=NA(NA)	spar=YLR089C.302495(GTG)
suva=YGR054W.571904(ATA)	scer=NA(NA)	spar=YGR054W.577327(ATA)
suva=YDR062W.376639(ATT)	scer=NA(NA)	spar=YDR062W.575170(ATT)
suva=YER107C.347674(CTG)	scer=NA(NA)	spar=YER107C.385693(ATT)
suva=YKR079C.573897(ATT)	scer=NA(NA)	spar=YKR079C.603742(ATT)
suva=YDL134C.209242(ATT)	scer=NA(NA)	spar=YDL134C.225705(GTG)
suva=YPL154C.270266(CTG)	scer=NA(NA)	spar=YPL154C.286216(ATA)
suva=YGR229C.905415(ATA)	scer=NA(NA)	spar=YGR229C.915905(ATA)
suva=YDR169C.587997(ATA)	scer=NA(NA)	spar=YDR169C.784152(ATC)
suva=YDL006W.437180(CTG)	scer=NA(NA)	spar=YDL006W.447903(CTG)
suva=YPL034W.489862(ACG)	scer=NA(NA)	spar=YPL034W.505743(ATG)
suva=YOL130W.52301(TTG)	scer=NA(NA)	spar=YOL130W.63770(ATT)
suva=YMR305C.863051(ATT)	scer=NA(NA)	spar=YMR305C.828529(TTG)
suva=YHR206W.719339(TTG)	scer=NA(NA)	spar=YHR206W.492517(CTG)
suva=YCR024C-A.77161(TTG)	scer=NA(NA)	spar=YCR024C-A.146771(TTG)
suva=YLR208W.532302(ACG)	scer=NA(NA)	spar=YLR208W.524745(ATC)
suva=YKL182W.85347(ATC)	scer=NA(NA)	spar=YKL182W.109022(ATT)
suva=YFR049W.11014(ATA)	scer=NA(NA)	spar=YFR049W.275356(ATA)
suva=YBL099W.33177(ATA)	scer=NA(NA)	spar=YBL099W.32184(ATA)
suva=YOR095C.261532(ATT)	scer=NA(NA)	spar=YOR095C.491730(TTG)
suva=YMR241W.733488(ATT)	scer=NA(NA)	spar=YMR241W.700045(TTG)
suva=YDR121W.488233(ACG)	scer=NA(NA)	spar=YDR121W.685410(CTG)
suva=YER148W.435249(CTG)	scer=NA(NA)	spar=YER148W.470720(TTG)
suva=YNL287W.89203(GTG)	scer=NA(NA)	spar=YNL287W.79398(GTG)
suva=YBR160W.729441(ATA)	scer=NA(NA)	spar=YBR160W.532683(ATA)
suva=YOR043W.173552(ATA)	scer=NA(NA)	spar=YOR043W.399303(TTG)
suva=YGL008C.473975(TTG)	scer=NA(NA)	spar=YGL008C.479260(ATT)
suva=YNL068C.497241(ATT)	scer=NA(NA)	spar=YNL068C.483879(GTG)
suva=YPL145C.289041(TTG)	scer=NA(NA)	spar=YPL145C.304894(ACG)
suva=YDR326C.882521(CTG)	scer=NA(NA)	spar=YDR326C.1163225(ATT)
suva=YNL298W.65461(ATG)	scer=NA(NA)	spar=YNL298W.56162(TTG)
suva=YJL039C.54875(TTG)	scer=NA(NA)	spar=YJL039C.345679(TTG)
suva=YGL055W.391711(GTG)	scer=NA(NA)	spar=YGL055W.396989(GTG)
suva=YMR119W.484775(ACG)	scer=NA(NA)	spar=YMR119W.484143(ATT)
suva=YDL061C.330614(ATA)	scer=NA(NA)	spar=YDL061C.345950(ATT)
suva=YOR020C.132397(ATT)	scer=NA(NA)	spar=YOR020C.356703(TTG)
suva=YKL183W.83410(ATT)	scer=NA(NA)	spar=YKL183W.107124(ATT)
suva=YML075C.120416(ATT)	scer=NA(NA)	spar=YML075C.118361(TTG)
suva=YDL140C.198950(ATT)	scer=NA(NA)	spar=YDL140C.215515(CNN)
suva=YGL008C.474101(ATT)	scer=NA(NA)	spar=YGL008C.479386(ATT)
suva=YDR477W.1164188(TTG)	scer=NA(NA)	spar=YDR477W.1389969(TTG)
suva=YJL124C.362224(TTG)	scer=NA(NA)	spar=YJL124C.180592(ATC)
suva=YEL042W.49289(TTG)	scer=NA(NA)	spar=YEL042W.51597(ATC)
suva=YLR167W.471063(ATT)	scer=NA(NA)	spar=YLR167W.464034(ATT)
suva=YDL145C.186099(CTG)	scer=NA(NA)	spar=YDL145C.202564(GTG)
suva=YOR136W.335351(GTG)	scer=NA(NA)	spar=YOR136W.532267(TTG)
suva=YHR152W.605443(ATC)	scer=NA(NA)	spar=YHR152W.379893(TTG)
suva=YKL185W.79181(ATT)	scer=NA(NA)	spar=YKL185W.102967(ATT)
suva=YJR045C.195366(ATT)	scer=NA(NA)	spar=YJR045C.497467(ATT)
suva=YLR342W.771086(TTG)	scer=NA(NA)	spar=YLR342W.763965(TTG)
suva=YBR249C.889163(ATA)	scer=NA(NA)	spar=YBR249C.697996(ATA)
suva=YLR403W.891190(ATT)	scer=NA(NA)	spar=YLR403W.880154(ATT)
suva=YFL024C.63979(ATC)	scer=NA(NA)	spar=YFL024C.123858(GTG)
suva=YDR099W.447719(ATA)	scer=NA(NA)	spar=YDR099W.646041(ATC)
suva=YGL189C.144357(ATG)	scer=NA(NA)	spar=YGL189C.148945(ATA)
suva=YPL016W.523920(CTG)	scer=NA(NA)	spar=YPL016W.540195(TTG)
suva=YKL139W.169043(ATT)	scer=NA(NA)	spar=YKL139W.193431(ATT)
suva=YAL053W.22993(ACG)	scer=NA(NA)	spar=YAL053W.21265(TTG)
suva=YKL109W.218350(ATT)	scer=NA(NA)	spar=YKL109W.242600(ATA)
suva=YLR332W.751908(ATA)	scer=NA(NA)	spar=YLR332W.744715(ATA)
suva=YDL235C.21606(ATT)	scer=NA(NA)	spar=YDL235C.39611(ATA)
suva=YNL190W.278270(ATC)	scer=NA(NA)	spar=YNL190W.266445(ATC)
suva=YGL189C.144291(TTG)	scer=NA(NA)	spar=YGL189C.148883(ATG)
suva=YLR332W.751582(ATA)	scer=NA(NA)	spar=YLR332W.744381(TTG)
suva=YLR190W.507708(CTG)	scer=NA(NA)	spar=YLR190W.500295(TTG)
suva=YOR350C.730603(ATC)	scer=NA(NA)	spar=YOR350C.931754(ATA)
suva=YGR014W.508818(ATT)	scer=NA(NA)	spar=YGR014W.513371(ATT)
suva=YGL173C.176226(CTG)	scer=NA(NA)	spar=YGL173C.180251(ATC)
suva=YBR140C.695912(TTG)	scer=NA(NA)	spar=YBR140C.499404(TTG)
suva=YNL197C.265436(ATT)	scer=NA(NA)	spar=YNL197C.253766(ATC)
suva=YBR221C.836575(ATT)	scer=NA(NA)	spar=YBR221C.646294(ATT)
suva=YNL220W.228631(TTG)	scer=NA(NA)	spar=YNL220W.218075(ACG)
suva=YDR524C.1242042(TTG)	scer=NA(NA)	spar=YDR524C.1467074(TTG)
suva=YLR257W.619746(TTG)	scer=NA(NA)	spar=YLR257W.611923(ATT)
suva=YOR166C.398942(TTG)	scer=NA(NA)	spar=YOR166C.595207(TTG)
suva=YCR012W.51480(ATC)	scer=NA(NA)	spar=YCR012W.120692(ATC)
suva=YDL134C.209343(ATA)	scer=NA(NA)	spar=YDL134C.225811(ATA)
suva=YBR221C.836686(ATA)	scer=NA(NA)	spar=YBR221C.646400(TTG)
suva=YGR267C.980565(ATT)	scer=NA(NA)	spar=YGR267C.990894(TTG)
suva=YDR372C.972828(ATT)	scer=NA(NA)	spar=YDR372C.965459(ATA)
suva=YGR090W.637958(ATC)	scer=NA(NA)	spar=YGR090W.643624(TTG)
suva=YPL023C.509582(TTG)	scer=NA(NA)	spar=YPL023C.525775(ATT)
suva=YOR065W.210175(TTG)	scer=NA(NA)	spar=YOR065W.434541(TTG)
suva=YKR028W.477557(TTG)	scer=NA(NA)	spar=YKR028W.508907(ATT)
suva=YNR055C.715005(ATC)	scer=NA(NA)	spar=YNR055C.707022(TTG)
suva=YDL132W.212703(ATT)	scer=NA(NA)	spar=YDL132W.229145(ATA)
suva=YPR119W.778814(ATT)	scer=NA(NA)	spar=YPR119W.788709(ATC)
suva=YDR326C.882419(ACG)	scer=NA(NA)	spar=YDR326C.1163125(TTG)
suva=YMR010W.275691(ATA)	scer=NA(NA)	spar=YMR010W.273638(ATG)
suva=YDL141W.190889(ATA)	scer=NA(NA)	spar=YDL141W.207336(ATT)
suva=NA(NA)	scer=YNL190W.282294(ATT)	spar=YNL190W.266554(ATT)
suva=NA(NA)	scer=YPR072W.690083(ATG)	spar=YPR072W.706509(ATG)
suva=NA(NA)	scer=YML068W.137529(ATG)	spar=YML068W.137343(ATG)
suva=NA(NA)	scer=YKL181W.107269(CTG)	spar=YKL181W.115687(CTG)
suva=NA(NA)	scer=YDR237W.936585(TTG)	spar=YDR237W.911724(TTG)
suva=NA(NA)	scer=YPR013C.585704(ATG)	spar=YPR013C.599986(ATG)
suva=NA(NA)	scer=YOR232W.774542(ATT)	spar=YOR232W.714940(GTG)
suva=NA(NA)	scer=YDR232W.927361(TTG)	spar=YDR232W.902480(TTG)
suva=NA(NA)	scer=YPL227C.121257(ATG)	spar=YPL227C.146046(ATG)
suva=NA(NA)	scer=YEL020C-B.117952(GTG)	spar=YEL020C-B.96383(GTG)
suva=NA(NA)	scer=YNL076W.483398(ATG)	spar=YNL076W.468902(ATG)
suva=NA(NA)	scer=YEL009C.139914(ATG)	spar=YEL009C.130005(ATG)
suva=NA(NA)	scer=YDR043C.543541(ATG)	spar=YDR043C.542134(ATG)
suva=NA(NA)	scer=YGL206C.107562(TTG)	spar=YGL206C.107949(TTG)
suva=NA(NA)	scer=YLR073C.281761(ATG)	spar=YLR073C.264072(ATG)
suva=NA(NA)	scer=YEL037C.82665(ATA)	spar=YEL037C.60513(ATA)
suva=NA(NA)	scer=YMR195W.653982(ATG)	spar=YMR195W.637426(ATG)
suva=NA(NA)	scer=YJL080C.289282(TTG)	spar=YJL080C.278132(TTG)
suva=NA(NA)	scer=YEL020C-B.117726(GTG)	spar=YEL020C-B.96157(GTG)
suva=NA(NA)	scer=YOR270C.830617(TTG)	spar=YOR270C.771086(TTG)
suva=NA(NA)	scer=YDR206W.862021(TTG)	spar=YDR206W.849101(TTG)
suva=NA(NA)	scer=YKL054C.338808(ATT)	spar=YKL054C.352401(ATT)
suva=NA(NA)	scer=YDL177C.141749(ATG)	spar=YDL177C.146210(ATG)
suva=NA(NA)	scer=YDL134C.220841(TTG)	spar=YDL134C.225725(TTG)
suva=NA(NA)	scer=YNL251C.174535(ATT)	spar=YNL251C.158021(TTG)
suva=NA(NA)	scer=YKL181W.107246(ACG)	spar=YKL181W.115667(ATT)
suva=NA(NA)	scer=YCR045W-A.208217(TTG)	spar=YCR045W-A.191813(TTG)
suva=NA(NA)	scer=YOL112W.106577(ATG)	spar=YOL112W.96077(ATG)
suva=NA(NA)	scer=YLR150W.440422(GTG)	spar=YLR150W.423770(GTG)
suva=NA(NA)	scer=YOL130W.74297(ATG)	spar=YOL130W.63700(ATG)
suva=NA(NA)	scer=YKL182W.100529(ATG)	spar=YKL182W.108953(ATG)
suva=NA(NA)	scer=YBR158W.556332(ATG)	spar=YBR158W.528913(ATG)
suva=NA(NA)	scer=YOR370C.1031148(TTG)	spar=YOR370C.968568(ATT)
suva=NA(NA)	scer=YPL221W.133007(TTG)	spar=YPL221W.157826(CTG)
suva=NA(NA)	scer=YFR033C.224816(ATA)	spar=YFR033C.251787(ATA)
suva=NA(NA)	scer=YER148W.465207(CTG)	spar=YER148W.470777(ATC)
suva=NA(NA)	scer=YDR062W.576221(TTG)	spar=YDR062W.575073(ACG)
suva=NA(NA)	scer=YHR135C.374390(ATG)	spar=YHR135C.353250(ATG)
suva=NA(NA)	scer=YLR256W.646167(TTG)	spar=YLR256W.605671(ATT)
suva=NA(NA)	scer=YOR272W.832743(ATG)	spar=YOR272W.773230(ATG)
suva=NA(NA)	scer=YBR242W.704563(ATG)	spar=YBR242W.684541(ATG)
suva=NA(NA)	scer=YML056C.164275(ATG)	spar=YML056C.164150(ATG)
suva=NA(NA)	scer=YMR148W.560277(TTG)	spar=YMR148W.539518(TTG)
suva=NA(NA)	scer=YBR270C.744595(ATG)	spar=YBR270C.724510(ATG)
suva=NA(NA)	scer=YCR027C.168099(TTG)	spar=YCR027C.151719(TTG)
suva=NA(NA)	scer=YIL125W.122519(TTG)	spar=YIL125W.103276(TTG)
suva=NA(NA)	scer=YPL140C.289170(ATG)	spar=YPL140C.314270(ATG)
suva=NA(NA)	scer=YDL020C.416748(TTG)	spar=YDL020C.425312(TTG)
suva=NA(NA)	scer=YBR283C.770479(TTG)	spar=YBR283C.750346(ATT)
suva=NA(NA)	scer=YPL190C.187781(TTG)	spar=YPL190C.212580(TTG)
suva=NA(NA)	scer=YNL190W.282332(TTG)	spar=YNL190W.266590(TTG)
suva=NA(NA)	scer=YKL190W.82906(ATG)	spar=YKL190W.91036(ATG)
suva=NA(NA)	scer=YDR047W.551677(ATG)	spar=YDR047W.550174(ACG)
suva=NA(NA)	scer=YMR239C.749729(ATG)	spar=YMR239C.697872(ATG)
suva=NA(NA)	scer=YMR145C.556513(TTG)	spar=YMR145C.535749(TTG)
suva=NA(NA)	scer=YML016C.241728(ATG)	spar=YML016C.229707(ATG)
suva=NA(NA)	scer=YHR183W.470909(TTG)	spar=YHR183W.450805(TTG)
suva=NA(NA)	scer=YER057C.271161(ATT)	spar=YER057C.272156(ATA)
suva=NA(NA)	scer=YLR372W.867330(TTG)	spar=YLR372W.821979(TTG)
suva=NA(NA)	scer=YGL134W.255638(ATG)	spar=YGL134W.254879(ATG)
suva=NA(NA)	scer=YDR334W.1135879(ATG)	spar=YDR334W.1173984(ATT)
suva=NA(NA)	scer=YDR153C.768006(ACG)	spar=YDR153C.758294(ATA)
suva=NA(NA)	scer=YNL201C.263266(TTG)	spar=YNL201C.247389(TTG)
suva=NA(NA)	scer=YOR061W.441431(ATG)	spar=YOR061W.428638(ATG)
suva=NA(NA)	scer=YOR153W.619756(TTG)	spar=YOR153W.566183(TTG)
suva=NA(NA)	scer=YER125W.410027(GTG)	spar=YER125W.421028(ATA)
suva=NA(NA)	scer=YIL002C.353457(ATG)	spar=YIL002C.329649(ATG)
suva=NA(NA)	scer=YKL163W.143644(ATG)	spar=YKL163W.153263(ATG)
suva=NA(NA)	scer=YJL026W.392380(ACG)	spar=YJL026W.382958(ATT)
suva=NA(NA)	scer=YOR198C.720134(TTG)	spar=YOR198C.661262(CTG)
suva=NA(NA)	scer=YHR009C.125930(ATG)	spar=YHR009C.104581(ATG)
suva=NA(NA)	scer=YDR065W.580669(ATG)	spar=YDR065W.579549(ATG)
suva=NA(NA)	scer=YDR086C.617228(TTG)	spar=YDR086C.616066(TTG)
suva=NA(NA)	scer=YBL099W.36980(TTG)	spar=YBL099W.32284(ATT)
suva=NA(NA)	scer=YLR342W.809945(ATT)	spar=YLR342W.764014(ATT)
suva=NA(NA)	scer=YLR378C.877260(TTG)	spar=YLR378C.831939(TTG)
suva=NA(NA)	scer=YCR084C.262572(ATT)	spar=YCR084C.246859(ATT)
suva=NA(NA)	scer=YDL047W.369719(GTG)	spar=YDL047W.374908(GTG)
suva=NA(NA)	scer=YLL051C.39525(ATG)	spar=YLL051C.26547(ATG)
suva=NA(NA)	scer=YDR074W.593866(CTG)	spar=YDR074W.592680(TTG)
suva=NA(NA)	scer=YGR057C.605526(ATG)	spar=YGR057C.586225(ATG)
suva=NA(NA)	scer=YLR120C.388259(GTG)	spar=YLR120C.371287(TTG)
suva=NA(NA)	scer=YKL182W.100394(TTG)	spar=YKL182W.108816(ATT)
suva=NA(NA)	scer=YER081W.322234(ATG)	spar=YER081W.332814(ATA)
suva=NA(NA)	scer=YDR077W.600773(ATA)	spar=YDR077W.599585(ATA)
suva=NA(NA)	scer=YLR113W.371547(ATT)	spar=YLR113W.353782(ATT)
suva=NA(NA)	scer=YNL229C.220234(TTG)	spar=YNL229C.203900(ATT)
suva=NA(NA)	scer=YNR074C.778796(TTG)	spar=YNR074C.34784(ATG)
suva=NA(NA)	scer=YNR055C.730401(ATG)	spar=YNR055C.707163(ATG)
suva=NA(NA)	scer=YAL029C.92346(TTG)	spar=YAL029C.67593(TTG)
suva=NA(NA)	scer=YGR065C.619968(ATG)	spar=YGR065C.600586(ATG)
suva=NA(NA)	scer=YPR149W.829891(ATA)	spar=YPR149W.842092(ATA)
suva=NA(NA)	scer=YOR233W.775730(GTG)	spar=YOR233W.716115(ATT)
suva=NA(NA)	scer=YOR342C.967716(ATG)	spar=YOR342C.909486(ATG)
suva=NA(NA)	scer=YPR024W.610375(TTG)	spar=YPR024W.624852(TTG)
suva=NA(NA)	scer=YOR247W.797592(TTG)	spar=YOR247W.738298(TTG)
suva=NA(NA)	scer=YDL198C.104619(ATG)	spar=YDL198C.110283(ATG)
suva=NA(NA)	scer=YBR043C.324011(ATA)	spar=YBR043C.295768(ATA)
suva=NA(NA)	scer=YMR108W.484042(TTG)	spar=YMR108W.463671(TTG)
suva=NA(NA)	scer=YGR093W.670337(ATG)	spar=YGR093W.651775(ATG)
suva=NA(NA)	scer=YBL045C.135552(CTG)	spar=YBL045C.130751(TTG)
suva=NA(NA)	scer=YOR261C.816987(TTG)	spar=YOR261C.757574(ATT)
suva=NA(NA)	scer=YGR218W.932497(TTG)	spar=YGR218W.897359(ATC)
suva=NA(NA)	scer=YLR286C.710175(TTG)	spar=YLR286C.663998(ATT)
suva=NA(NA)	scer=YLR229C.604808(ACG)	spar=YLR229C.563482(ACG)
suva=NA(NA)	scer=YNL156C.342014(ACG)	spar=YNL156C.326373(ACG)
suva=NA(NA)	scer=YCR011C.136911(TTG)	spar=YCR011C.119882(TTG)
suva=NA(NA)	scer=YPR103W.732298(TTG)	spar=YPR103W.748964(TTG)
suva=NA(NA)	scer=YLR360W.846073(ATT)	spar=YLR360W.800641(ATT)
suva=NA(NA)	scer=YOL125W.83787(ATG)	spar=YOL125W.73267(ATG)
suva=NA(NA)	scer=YNL207W.255293(TTG)	spar=YNL207W.239379(TTG)
suva=NA(NA)	scer=YFL038C.56017(TTG)	spar=YFL038C.89347(ATT)
suva=NA(NA)	scer=YLR256W.646293(TTG)	spar=YLR256W.605800(TTG)
suva=NA(NA)	scer=YML106W.56630(TTG)	spar=YML106W.56261(TTG)
suva=NA(NA)	scer=YBR121C.483437(ATT)	spar=YBR121C.456032(ATT)
suva=NA(NA)	scer=YPL125W.313348(CTG)	spar=YPL125W.338491(CTG)
suva=NA(NA)	scer=YDR395W.1263282(TTG)	spar=YDR395W.1228923(TTG)
suva=NA(NA)	scer=YNL064C.507169(TTG)	spar=YNL064C.492721(TTG)
suva=NA(NA)	scer=YDR033W.508062(TTG)	spar=YDR033W.516773(TTG)
suva=NA(NA)	scer=YER089C.337382(ATT)	spar=YER089C.347993(TTG)
suva=NA(NA)	scer=YPR036W-A.645906(CTG)	spar=YPR036W-A.660946(CTG)
suva=NA(NA)	scer=YGR038W.560603(TTG)	spar=YGR038W.552196(TTG)
suva=NA(NA)	scer=YNL164C.326339(ATG)	spar=YNL164C.310635(ATG)
suva=NA(NA)	scer=YDL134C.221113(TTG)	spar=YDL134C.225992(TTG)
suva=NA(NA)	scer=YGL006W.485876(GTG)	spar=YGL006W.482491(GTG)
suva=NA(NA)	scer=YDR034C.512137(TTG)	spar=YDR034C.520816(TTG)
suva=NA(NA)	scer=YKL032C.381896(GTG)	spar=YKL032C.395292(GTG)
suva=NA(NA)	scer=YDL171C.155819(TTG)	spar=YDL171C.160202(CTG)
suva=NA(NA)	scer=YDL132W.224201(TTG)	spar=YDL132W.229086(TTG)
suva=NA(NA)	scer=YHR050W.207585(TTG)	spar=YHR050W.185397(TTG)
suva=NA(NA)	scer=YLR347C.826451(CTG)	spar=YLR347C.780969(CTG)
suva=NA(NA)	scer=YOR360C.1014865(TTG)	spar=YOR360C.951658(TTG)
suva=NA(NA)	scer=YPL221W.132856(TTG)	spar=YPL221W.157678(TTG)
suva=NA(NA)	scer=YPL076W.410390(ATG)	spar=YPL076W.435483(ATG)
suva=NA(NA)	scer=YNR044W.703593(ATG)	spar=YNR044W.680017(ATG)
suva=NA(NA)	scer=YLR342W.809968(ATC)	spar=YLR342W.764037(ATA)
suva=NA(NA)	scer=YPL239W.99413(TTG)	spar=YPL239W.124157(TTG)
suva=NA(NA)	scer=YKL184W.96700(TTG)	spar=YKL184W.105178(CTG)
suva=NA(NA)	scer=YBR187W.602519(ATG)	spar=YBR187W.579728(ATG)
suva=NA(NA)	scer=YOR326W.925676(ATT)	spar=YOR326W.867429(ATA)
suva=NA(NA)	scer=YDL084W.305187(TTG)	spar=YDL084W.310033(TTG)
suva=NA(NA)	scer=YDR280W.1020714(TTG)	spar=YDR280W.1065211(TTG)
suva=NA(NA)	scer=YPL235W.103203(TTG)	spar=YPL235W.127955(TTG)
suva=NA(NA)	scer=YER089C.337583(TTG)	spar=YER089C.348187(TTG)
suva=NA(NA)	scer=YNL142W.357226(ATG)	spar=YNL142W.341679(ATG)
suva=NA(NA)	scer=YKL063C.321540(GTG)	spar=YKL063C.335115(GTG)
suva=NA(NA)	scer=YDR033W.508104(ATC)	spar=YDR033W.516816(ATT)
suva=NA(NA)	scer=YOL103W.123898(TTG)	spar=YOL103W.108168(TTG)
suva=NA(NA)	scer=YGR240C.973781(TTG)	spar=YGR240C.939079(TTG)
suva=NA(NA)	scer=YGL044C.417062(TTG)	spar=YGL044C.413778(ATC)
suva=NA(NA)	scer=YBR242W.704493(ATG)	spar=YBR242W.684473(ATG)
suva=NA(NA)	scer=YEL009C.139939(ATG)	spar=YEL009C.130034(ATG)
suva=NA(NA)	scer=YKL109W.231977(ATG)	spar=YKL109W.242448(ATG)
suva=NA(NA)	scer=YNL288W.90250(TTG)	spar=YNL288W.77753(GTG)
suva=NA(NA)	scer=YDR276C.1013673(TTG)	spar=YDR276C.1059057(TTG)
suva=NA(NA)	scer=YPL260W.49268(TTG)	spar=YPL260W.71061(TTG)
suva=NA(NA)	scer=YNL186W.289393(TTG)	spar=YNL186W.273677(CTG)
suva=NA(NA)	scer=YDR206W.861806(ATG)	spar=YDR206W.848882(ATG)
suva=NA(NA)	scer=YHL016C.74994(ATG)	spar=YHL016C.65914(ATG)
suva=NA(NA)	scer=YPR016C.593153(TTG)	spar=YPR016C.607574(TTG)
suva=NA(NA)	scer=YDR326C.1124984(TTG)	spar=YDR326C.1163125(TTG)
suva=NA(NA)	scer=YMR010W.284871(ATG)	spar=YMR010W.273638(ATG)
suva=NA(NA)	scer=YDL141W.203018(ATT)	spar=YDL141W.207336(ATT)
suva=NA(NA)	scer=YER094C.349389(TTG)	spar=YER094C.360287(TTG)
